# Supplementary material for: Synthesis of indolo- and pyrrolo[1,2-a]quinoxalinones through a palladium-catalyzed oxidative carbonylation of the C2 position of indole
Source: Royal Society of Chemistry journal article supplement (doi:10.1039/c9ob02703c), 2020-01-01

## Synthesis of Indolo- and Pyrrolo[1,2-a]quinoxalinones through Palladium-Catalyzed Oxidative Carbonylation of C<sub>2</sub> Position of Indole

Attoor Chandrasekhar and Sethuraman Sankararaman\*

Department of Chemistry, Indian Institute of Technology Madras, Chennai 600036, India

### Supporting information:

| S.No | CONTENT                                                                                                                                                                                        | PAGE No   |
|------|------------------------------------------------------------------------------------------------------------------------------------------------------------------------------------------------|-----------|
| I    | General procedure for the synthesis of 2-(1 <i>H</i> -indol-1-yl)anilines ( <b>1-5</b> )                                                                                                       | SI2       |
| II   | Spectral data of <b>1-4</b>                                                                                                                                                                    | SI2       |
| III  | Spectral data of <b>5- 7</b>                                                                                                                                                                   | SI3       |
| IV   | Methylation of iodoanilines                                                                                                                                                                    | SI3       |
| V    | General procedure for the synthesis of 2-(1 <i>H</i> -indol-1-yl)- <i>N</i> -methylanilines and <i>N</i> -methyl-2-(1 <i>H</i> -pyrrol-1-yl)anilines                                           | SI3       |
| VI   | Spectral data of <b>8-30 &amp; 34-39</b>                                                                                                                                                       | SI5-SI11  |
| VII  | Synthesis and Spectral data of 2-(1 <i>H</i> -indol-1-yl)- <i>N</i> -phenylaniline ( <b>31</b> ) and spectra                                                                                   | SI11      |
| VIII | Synthesis and Spectral data of 2-(1 <i>H</i> -imidazol-1-yl)- <i>N</i> -methylaniline ( <b>32</b> ) & 2-(1 <i>H</i> -benzo[d]imidazol-1-yl)- <i>N</i> -methylaniline ( <b>33</b> ) and spectra | SI12      |
| IX   | References                                                                                                                                                                                     | SI13      |
| X    | NMR Spectra of the reaction products                                                                                                                                                           | SI14-SI52 |
| XI   | NMR Spectra of the substrates                                                                                                                                                                  | SI53-SI85 |
| XII  | Crystal data and structure refinement for ' <b>3a</b> '                                                                                                                                        | SI86      |
| XIII | Crystal data and structure refinement for ' <b>8a</b> '                                                                                                                                        | SI87      |
| XIV  | Crystal data and structure refinement for ' <b>35a</b> '                                                                                                                                       | SI88      |

## General procedure for Synthesis of 2-(1*H*-indol-1-yl)anilines (1-5): <sup>A1</sup>

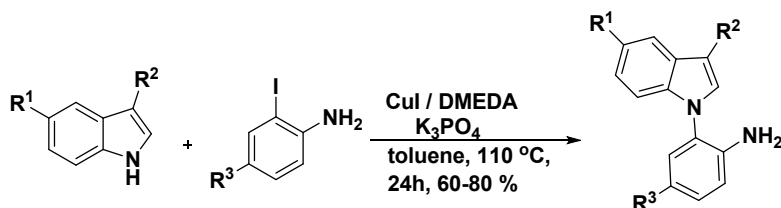

To a 20 mL oven dried reaction tube were added Indole (1 equiv.), *N,N'*-Dimethylethylenediamine (DMEDA) (0.2 equiv.), aryl halide (1.1 equiv.) and CuI (0.1 equiv.). Then toluene was added to the reaction mixture followed by K<sub>3</sub>PO<sub>4</sub> (2.5equiv.). The reaction mixture was stirred under N<sub>2</sub> atmosphere at 110 °C for 24h. The reaction mixture was cooled to room temperature, diluted with ethyl acetate (5 mL), filtered through a Celite pad and washed with additional ethyl acetate (10-20 mL). The filtrate was concentrated and the resulting residue was purified by column chromatography.

### Spectral data

#### 2-(1*H*-indol-1-yl)aniline (1): <sup>A2</sup>

Pale yellow liquid, <sup>1</sup>H NMR (400 MHz, CDCl<sub>3</sub>): δ 7.62-7.60 (m, 1H), 7.19-7.06 (m, 6H), 6.81-6.75 (m, 2H), 6.61 (d, *J* = 2.8 Hz, 1H), 3.16 (br, 2H); <sup>13</sup>C NMR (100 MHz, CDCl<sub>3</sub>): δ 143.0, 136.5, 129.3, 128.76, 128.73, 128.6, 125.0, 122.3, 121.0, 120.2, 118.8, 116.4, 110.8, 103.3.

#### 2-(1*H*-indol-1-yl)-4-methylaniline (2): <sup>A2</sup>

Light brown liquid, <sup>1</sup>H NMR (400 MHz, CDCl<sub>3</sub>): δ 7.62-7.59 (m, 1H), 7.12-7.05 (m, 4H), 6.99-6.97 (m, 1H), 6.93 (d, *J* = 1.6 Hz, 1H), 6.71 (d, *J* = 8.4 Hz, 1H), 6.60 (dd, *J* = 0.4 Hz 3.2 Hz, 1H), 3.00 (br, 2H), 2.20 (s, 3H); <sup>13</sup>C NMR (100 MHz, CDCl<sub>3</sub>): δ 140.4, 136.5, 129.8, 129.0, 128.7, 128.6, 128.3, 125.0, 122.2, 121.0, 120.2, 116.5, 110.8, 103.2, 20.4.

#### 4-*tert*-butyl-2-(1*H*-indol-1-yl)aniline (3):

Brownish yellow liquid, <sup>1</sup>H NMR (400 MHz, CDCl<sub>3</sub>): δ 7.63-7.60 (m, 1H), 7.20 (dd, *J* = 2.4 Hz 8.4 Hz, 1H), 7.168-7.161 (m, 1H), 7.13-7.06 (m, 4H), 6.75 (d, *J* = 8.4 Hz, 1H), 6.61 (d, *J* = 3.2 Hz, 1H), 3.04 (br, 2H), 1.22 (s, 9H); <sup>13</sup>C NMR (100 MHz, CDCl<sub>3</sub>): δ 142.1, 140.3, 136.5, 128.8, 128.6, 126.1, 125.5, 124.7, 122.3, 121.0, 120.2, 116.2, 110.9, 103.1, 34.2, 31.6.

#### 2-(5-chloro-1*H*-indol-1-yl)aniline (4): <sup>A2</sup>

Pale yellow liquid,  $^1\text{H}$  NMR (400 MHz,  $\text{CDCl}_3$ ):  $\delta$  7.56 (s, 1H), 7.19-7.14 (m, 2H), 7.09-7.04 (m, 2H), 6.98-6.96 (m, 1H), 6.80-6.75 (m, 2H), 6.54 (d,  $J = 2.4$  Hz, 1H), 3.14 (br, 2H);  $^{13}\text{C}$  NMR (100 MHz,  $\text{CDCl}_3$ ):  $\delta$  143.0, 134.9, 130.0, 129.7, 129.6, 128.6, 126.0, 124.5, 122.6, 120.4, 118.8, 116.5, 111.9, 102.9.

**2-(3-methyl-1*H*-indol-1-yl)aniline (5):** <sup>A2</sup>

Colorless liquid,  $^1\text{H}$  NMR (400 MHz,  $\text{CDCl}_3$ ):  $\delta$  7.55 (d,  $J = 6.8$  Hz, 1H), 7.151-7.01 (m, 5H), 6.90 (s, 1H), 6.78-6.72 (m, 2H), 3.13 (br, 2H), 2.30 (s, 3H);  $^{13}\text{C}$  NMR (100 MHz,  $\text{CDCl}_3$ ):  $\delta$  143.1, 136.8, 129.1, 128.9, 128.7, 126.2, 125.3, 122.3, 119.6, 119.1, 118.7, 116.3, 112.5, 110.7, 9.76.

***N*-(2-(1*H*-indol-1-yl)phenyl)acetamide (6):** <sup>A2</sup>

Colorless liquid;  $^1\text{H}$  NMR (400 MHz,  $\text{CDCl}_3$ ):  $\delta$  8.34 (d,  $J = 6.8$  Hz, 1H), 7.65-7.63 (m, 1H), 7.38(t,  $J = 7.2$ Hz, 1H), 7.18-7.10 (m, 4H), 7.0 (d,  $J = 4.8$ Hz, 1H) , 6.76 (s,1H), 6.68(d,  $J = 2$ Hz, 1H), 1.81 (s, 3H);  $^{13}\text{C}$  NMR (100 MHz,  $\text{CDCl}_3$ ):  $\delta$  168.6, 136.8, 134.5, 129.2, 128.8, 128.6, 128.1, 124.7, 123.0, 122.3, 121.4, 120.9, 110.4, 104.5, 24.7.

***N*-(2-(1*H*-indol-1-yl)phenyl)tosylamide (7):** <sup>A3</sup>

Colorless oil;  $^1\text{H}$  NMR (400 MHz,  $\text{CDCl}_3$ ):  $\delta$  7.87 (dd,  $J = 0.8$  Hz, 8.3Hz, 1H), 7.68 (d,  $J = 7.7$  Hz, 1H), 7.46-7.40 (m, 3H), 7.23-7.07 (m, 6H), 6.67-6.62 (m, 3H), 6.34 (s, 1H), 2.39 (s, 3H);  $^{13}\text{C}$  NMR (100 MHz,  $\text{CDCl}_3$ ):  $\delta$  144.2, 136.8, 135.7, 133.9, 129.7, 129.6, 128.9, 128.6, 128.0, 127.2, 125.5, 123.0, 121.8, 121.3, 120.9, 109.8, 104.6, 21.7.

**Methylation of iodoanilines:** Reported procedure is followed.<sup>B</sup>

**General procedure for Synthesis of 2-(1*H*-indol-1-yl)-*N*-methylanilines and *N*-methyl-2-(1*H*-pyrrol-1-yl)anilines :**

To a 20 mL oven dried reaction tube were added Indole or pyrrole (1 equiv.), *N,N*-dimethylethylenediamine (DMEDA) (0.2 equiv.), 2-iodo-*N*-methylaniline (1.2 equiv.) and CuI (0.1 equiv). Then toluene was added to the reaction mixture followed by  $\text{K}_3\text{PO}_4$  (2.5equiv.). The reaction mixture was stirred under  $\text{N}_2$  atmosphere at 110 °C for 24h. The reaction mixture was cooled to room temperature, diluted with ethyl acetate (5mL), filtered through a celite pad and

washed with additional ethyl acetate (10-20 mL). The filtrate was concentrated and the resulting residue was purified by column chromatography.

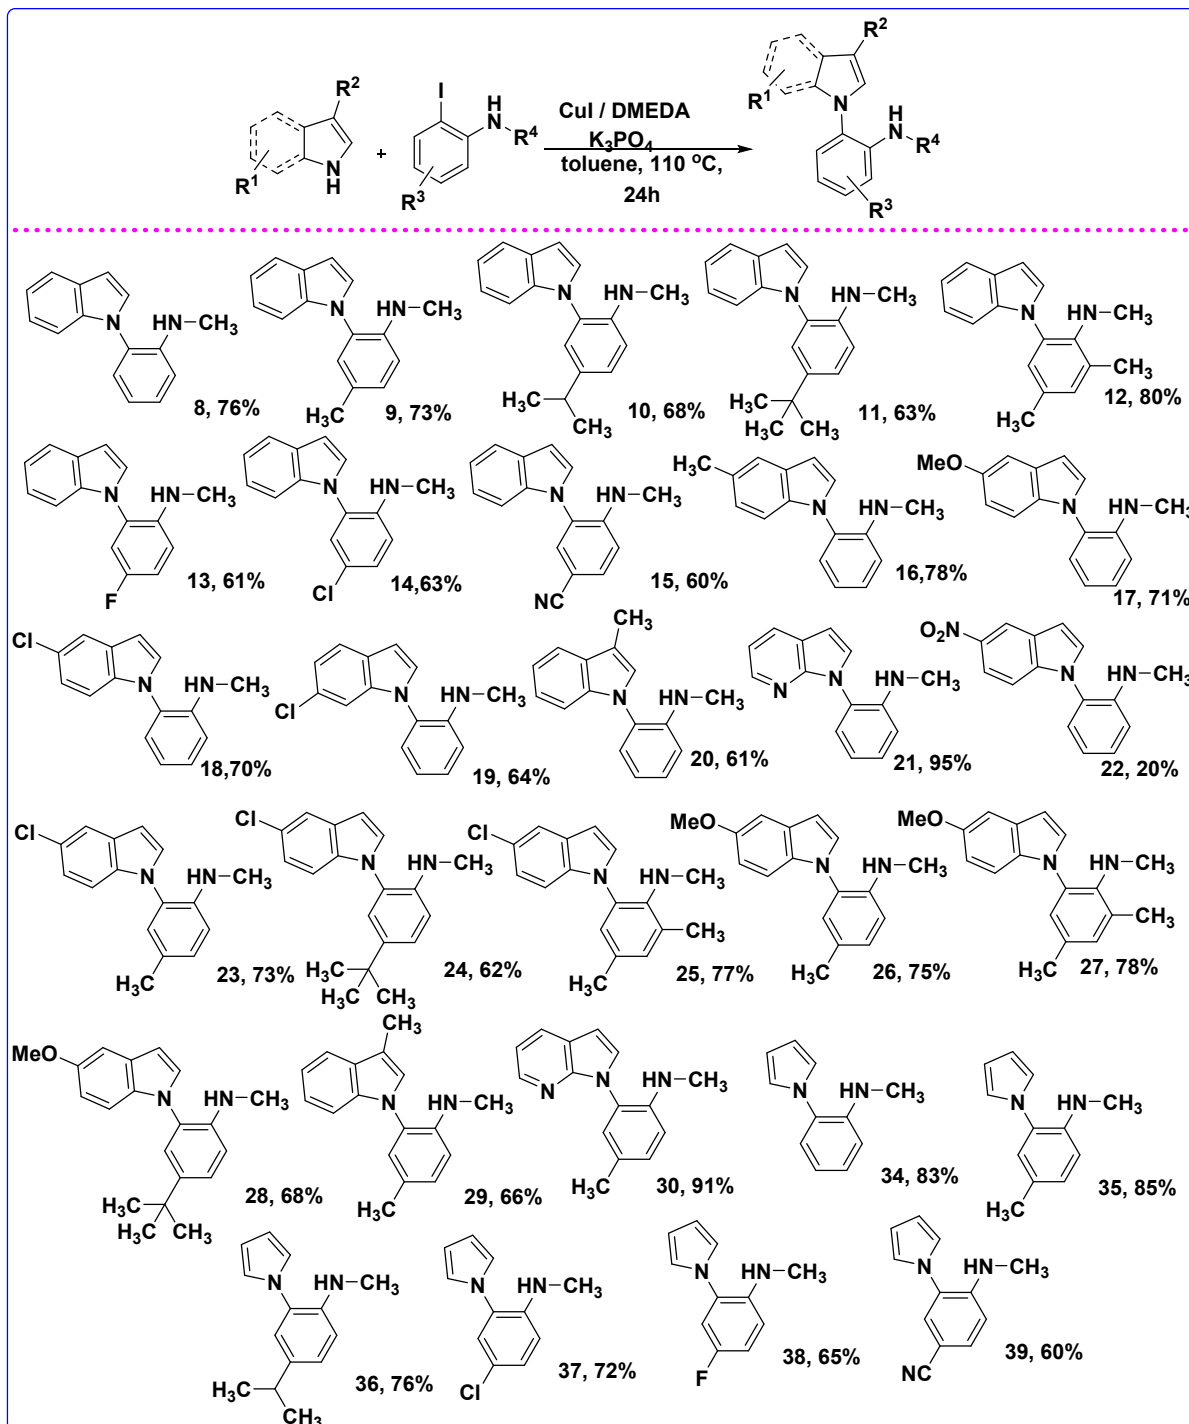

(3-iodo-4-(methylamino)benzonitrile: 4-aminonitrile is converted into 4-(methylamino)benzonitrile<sup>B</sup> followed by iodination).<sup>C</sup>

## Spectral data

### **2-(1*H*-indol-1-yl)-*N*-methylaniline (8):**

Color less oil, <sup>1</sup>H NMR (400 MHz, CDCl<sub>3</sub>): δ 7.62-7.60 (m, 1H), 7.29-7.24 (m, 1H), 7.10-7.07 (m, 4H), 7.03-7.00 (m, 1H), 6.71-6.67 (m, 2H), 6.61 (d, *J* = 2.8 Hz, 1H), 3.50 (br, 1H), 2.66 (s, 3H); <sup>13</sup>C NMR (100 MHz, CDCl<sub>3</sub>): δ 145.7, 136.6, 129.6, 128.9, 128.6, 128.4, 124.5, 122.3, 121.0, 120.2, 116.6, 110.89, 110.86, 103.2, 30.3; HRMS (ESI, *m/z*) Calcd for C<sub>15</sub>H<sub>14</sub>N<sub>2</sub>Na 245.1049 (M+Na), found 245.1058.

### **2-(1*H*-indol-1-yl)-*N*,4-dimethylaniline (9):**

Colorless liquid, <sup>1</sup>H NMR (400 MHz, CDCl<sub>3</sub>): δ 7.61 (d, *J* = 6.8 Hz, 1H), 7.10-7.01 (m, 5H), 6.92 (s, 1H), 6.63 (d, *J* = 8.4 Hz, 1H), 6.60 (d, *J* = 2.8 Hz, 1H), 3.35 (br, 1H), 2.65 (s, 3H), 2.21 (s, 3H); <sup>13</sup>C NMR (100 MHz, CDCl<sub>3</sub>): δ 143.4, 136.6, 130.0, 129.0, 128.9, 128.6, 126.0, 124.5, 122.2, 121.0, 120.2, 111.0, 110.8, 103.1, 30.6, 20.3; HRMS (ESI, *m/z*) Calcd for C<sub>16</sub>H<sub>17</sub>N<sub>2</sub> 237.1386 (M+H), found 237.1386.

### **2-(1*H*-indol-1-yl)-4-isopropyl-*N*-methylaniline (10):**

Pale orange oil, <sup>1</sup>H NMR (400 MHz, CDCl<sub>3</sub>): δ 7.61 (d, *J* = 7.2 Hz, 1H), 7.16-7.04 (m, 5H), 6.97 (s, 1H), 6.66 (d, *J* = 8.4 Hz, 1H), 6.60 (d, *J* = 2.8 Hz, 1H), 3.37 (br, 1H), 2.78 (m, 1H), 2.66 (s, 3H), 1.16 (d, *J* = 6.8 Hz, 6H); <sup>13</sup>C NMR (100 MHz, CDCl<sub>3</sub>): δ 143.6, 137.5, 136.7, 129.0, 128.6, 127.4, 126.3, 124.5, 122.2, 121.0, 120.2, 111.0, 110.9, 103.1, 33.1, 30.6, 24.36, 24.30; HRMS (ESI, *m/z*) Calcd for C<sub>18</sub>H<sub>21</sub>N<sub>2</sub> 265.1705 (M+H), found 265.1697.

### **4-*tert*-butyl-2-(1*H*-indol-1-yl)-*N*-methylaniline (11):**

Colorless liquid, <sup>1</sup>H NMR (400 MHz, CDCl<sub>3</sub>): δ 7.62 (d, *J* = 6.8 Hz, 1H), 7.30 (dd, *J* = 2.0 Hz, 8.4 Hz, 1H), 7.17-7.03 (m, 5H), 6.68 (d, *J* = 8.8 Hz, 1H), 6.61 (d, *J* = 2.8 Hz, 1H), 3.39 (br, 1H), 2.67 (s, 3H), 1.22 (s, 9H); <sup>13</sup>C NMR (100 MHz, CDCl<sub>3</sub>): δ 143.3, 139.8, 136.7, 129.0, 128.6, 126.2, 125.5, 124.2, 122.2, 121.0, 120.2, 110.9, 110.6, 103.1, 34.0, 31.6, 30.5; HRMS (ESI, *m/z*) Calcd for C<sub>19</sub>H<sub>23</sub>N<sub>2</sub> 280.1888 (M+H), found 280.1887.

### **2-(1*H*-indol-1-yl)-*N*,4,6-trimethylaniline (12):**

Pale red oil,  $^1\text{H}$  NMR (400 MHz,  $\text{CDCl}_3$ ):  $\delta$  7.59 (d,  $J = 8.0$  Hz, 1H), 7.12-7.04 (m, 4H), 6.94 (s, 1H), 6.82 (s, 1H), 6.58 (d,  $J = 2.8$  Hz, 1H), (br, 1H), 2.25-2.24 (m, 6H), 2.19 (s, 3H);  $^{13}\text{C}$  NMR (100 MHz,  $\text{CDCl}_3$ ):  $\delta$  143.5, 137.4, 131.9, 129.9, 129.2, 128.8, 128.6, 128.4, 127.3, 122.2, 120.8, 120.1, 110.8, 102.9, 34.7, 20.4, 18.8; HRMS (ESI,  $m/z$ ) Calcd for  $\text{C}_{17}\text{H}_{19}\text{N}_2$  251.1548 (M+H), found 251.1563.

**4-fluoro-2-(1H-indol-1-yl)-N-methylaniline (13):**

Pale yellow liquid,  $^1\text{H}$  NMR (400 MHz,  $\text{CDCl}_3$ ):  $\delta$  7.61 (d,  $J = 8.0$  Hz, 1H), 7.13-7.08 (m, 3H), 7.03-6.98 (m, 2H), 6.88 (dd,  $J = 8.8$  Hz, 2.8 Hz, 1H), 6.64-6.61 (m, 2H), 3.36 (br, 1H), 2.66 (s, 3H);  $^{13}\text{C}$  NMR (100 MHz,  $\text{CDCl}_3$ ):  $\delta$  155.7, 153.3, 142.4, 136.4, 128.7, 128.6, 124.7, 124.6, 122.6, 121.1, 120.5, 116.0, 115.8, 115.6, 115.4, 111.3, 111.2, 110.7, 103.8, 30.8; HRMS (ESI,  $m/z$ ) Calcd for  $\text{C}_{15}\text{H}_{14}\text{N}_2\text{F}$  241.1141 (M+H), found 241.1145.

**4-chloro-2-(1H-indol-1-yl)-N-methylaniline (14):**

Colorless liquid,  $^1\text{H}$  NMR (400 MHz,  $\text{CDCl}_3$ ):  $\delta$  7.62-7.60 (m, 1H), 7.23 (dd,  $J = 8.8$  Hz, 2.8 Hz, 1H), 7.14-7.06 (m, 4H), 7.02-7.00 (m, 1H), 6.63-6.61 (m, 2H), 3.51 (d,  $J = 3.6$  Hz, 1H), 2.66 (d,  $J = 4.8$  Hz, 1H);  $^{13}\text{C}$  NMR (100 MHz,  $\text{CDCl}_3$ ):  $\delta$  144.4, 136.4, 129.4, 128.7, 128.5, 128.3, 125.1, 122.6, 121.1, 120.7, 120.5, 111.7, 110.7, 103.9, 30.4; HRMS (ESI,  $m/z$ ) Calcd for  $\text{C}_{15}\text{H}_{14}\text{N}_2\text{Cl}$  257.0846 (M+H), found 257.0873.

**3-(1H-indol-1-yl)-4-(methylamino)benzotrile (15):**

Colorless oil,  $^1\text{H}$  NMR (400 MHz,  $\text{CDCl}_3$ ):  $\delta$  7.719-7.69 (m, 1H), 7.62 (d,  $J = 8.4$  Hz, 1H), 7.44 (s, 1H), 7.21-7.19 (m, 2H), 7.11 (d,  $J = 8.4$  Hz, 1H), 7.04 (d,  $J = 8.4$  Hz, 1H), 6.77 (d,  $J = 8.8$  Hz, 1H), 6.73 (d,  $J = 3.2$  Hz, 1H), 4.18 (d,  $J = 3.6$  Hz, 1H), 2.82 (d,  $J = 5.2$  Hz, 3H),  $^{13}\text{C}$  NMR (100 MHz,  $\text{CDCl}_3$ ):  $\delta$  148.9, 136.3, 134.1, 132.2, 128.8, 128.2, 124.3, 122.9, 121.3, 120.8, 119.5, 110.6, 110.4, 104.5, 98.4, 29.8; HRMS (ESI,  $m/z$ ) Calcd for  $\text{C}_{16}\text{H}_{13}\text{N}_3\text{Na}$  270.1002 (M+Na), found 270.1009.

**N-methyl-2-(5-methyl-1H-indol-1-yl)aniline (16):**

Colorless oil,  $^1\text{H}$  NMR (400 MHz,  $\text{CDCl}_3$ ):  $\delta$  7.40 (s, 1H), 7.28-7.24 (m, 1H), 7.09-7.05 (m, 2H), 6.92 (s, 2H), 6.71-6.67 (m, 2H), 6.52 (d,  $J = 2.8$  Hz, 1H), 3.53 (br, 1H), 2.67 (s, 3H), 2.38 (s, 3H);

<sup>13</sup>C NMR (100 MHz, CDCl<sub>3</sub>): δ 145.7, 135.0, 129.5, 129.0, 128.4, 128.2, 127.8, 124.7, 123.9, 120.6, 116.6, 110.8, 110.5, 102.7, 30.3, 21.5; HRMS (ESI, m/z) Calcd for C<sub>16</sub>H<sub>17</sub>N<sub>2</sub> 237.1386 (M+H), found 237.1396.

**2-(5-methoxy-1*H*-indol-1-yl)-*N*-methylaniline (17):**

Colorless oil, <sup>1</sup>H NMR (400 MHz, CDCl<sub>3</sub>): δ 7.26-7.22 (m, 1H), 7.07-7.05 (m, 3H), 6.90 (d, *J* = 8.8 Hz, 1H), 6.75-6.67 (m, 3H), 6.51 (d, *J* = 2.8 Hz, 1H), 3.76 (s, 3H), 2.64 (s, 3H); <sup>13</sup>C NMR (100 MHz, CDCl<sub>3</sub>): δ 154.6, 145.5, 131.8, 129.5, 129.4, 129.0, 128.4, 124.8, 116.8, 112.5, 111.6, 111.1, 102.9, 102.6, 55.9, 30.4; HRMS (ESI, m/z) Calcd for C<sub>16</sub>H<sub>17</sub>N<sub>2</sub>O 253.1337 (M+H), found 237.1343.

**2-(5-chloro-1*H*-indol-1-yl)-*N*-methylaniline (18):**

Colorless oil, <sup>1</sup>H NMR (400 MHz, CDCl<sub>3</sub>): δ 7.56 (d, *J* = 2.0 Hz, 1H), 7.30-7.26 (m, 1H), 7.11 (d, *J* = 2.0 Hz, 1H), 7.07-7.02 (m, 2H), 6.92 (d, *J* = 8.4 Hz, 1H), 6.73-6.69 (m, 2H), 6.54 (d, *J* = 3.2 Hz, 1H), 2.67 (s, 3H); <sup>13</sup>C NMR (100 MHz, CDCl<sub>3</sub>): δ 145.4, 135.0, 130.2, 129.9, 129.6, 128.4, 126.0, 124.1, 122.6, 120.4, 116.8, 111.9, 111.2, 102.9, 30.4; HRMS (ESI, m/z) Calcd for C<sub>15</sub>H<sub>14</sub>N<sub>2</sub>Cl 257.0841 (M+H), found 257.0839.

**2-(6-chloro-1*H*-indol-1-yl)-*N*-methylaniline (19):**

Light brown oil, <sup>1</sup>H NMR (400 MHz, CDCl<sub>3</sub>): δ 7.50 (d, *J* = 8.4 Hz, 1H), 7.32-7.27 (m, 1H), 7.10-7.01 (m, 4H), 6.77-6.71 (m, 2H), 6.58 (d, *J* = 3.2 Hz, 1H), 2.68 (s, 3H); <sup>13</sup>C NMR (100 MHz, CDCl<sub>3</sub>): δ 145.3, 137.1, 130.0, 129.6, 128.5, 128.4, 127.1, 124.1, 121.8, 121.0, 117.1, 111.4, 110.8, 103.4, 30.5; HRMS (ESI, m/z) Calcd for C<sub>15</sub>H<sub>14</sub>N<sub>2</sub>Cl 257.0840 (M+H), found 257.0842.

***N*-methyl-2-(3-methyl-1*H*-indol-1-yl)aniline (20):**

Pale yellow oil, <sup>1</sup>H NMR (400 MHz, CDCl<sub>3</sub>): δ 7.56-7.54 (m, 1H), 7.27-7.23 (m, 1H), 7.10-7.06 (m, 3H), 6.99-6.97 (m, 1H), 6.88 (s, 1H), 6.73-6.68 (m, 2H), 2.67 (s, 3H), 2.31 (s, 3H); <sup>13</sup>C NMR (100 MHz, CDCl<sub>3</sub>): δ 145.6, 136.9, 129.3, 129.0, 128.4, 126.4, 124.9, 122.2, 119.6, 116.1, 116.8, 112.5, 111.0, 110.7, 30.4, 9.7; HRMS (ESI, m/z) Calcd for C<sub>16</sub>H<sub>17</sub>N<sub>2</sub> 237.1386 (M+H), found 237.1387.

***N*-methyl-2-(1*H*-pyrrolo[2,3-*b*]pyridin-1-yl)aniline (21):**

White solid, Mp: 75-80 °C, <sup>1</sup>H NMR (400 MHz, CDCl<sub>3</sub>): δ 8.34 (d, *J* = 4.4 Hz, 1H), 7.99 (d, *J* = 7.6 Hz, 1H), 7.38-7.31 (m, 2H), 7.19 (d, *J* = 7.6 Hz, 1H), 7.14-7.11 (m, 1H), 6.87-6.81 (m, 2H), 6.66-6.65 (d, *J* = 3.6 Hz, 1H), 3.98 (br, 1H), 2.79 (s, 3H); <sup>13</sup>C NMR (100 MHz, CDCl<sub>3</sub>): δ 148.1, 145.5, 143.9, 129.8, 129.7, 129.3, 128.4, 124.3, 120.9, 117.2, 116.5, 111.7, 101.6, 30.5; HRMS (ESI, m/z) Calcd for C<sub>14</sub>H<sub>13</sub>N<sub>3</sub>Na 246.1002 (M+H), found 246.1009.

***N*-methyl-2-(5-nitro-1*H*-indol-1-yl)aniline (22):**

Yellow solid, Mp: 136-138 °C, <sup>1</sup>H NMR (400 MHz, CDCl<sub>3</sub>): δ 8.54 (s, 1H), 7.97 (d, *J* = 9.2 Hz, 1H), 7.34-7.32 (m, 1H), 7.25 (d, *J* = 3.2 Hz, 1H), 7.07 (d, *J* = 7.6 Hz, 1H), 7.03 (d, *J* = 9.2 Hz, 1H), 6.78-6.72 (m, 3H), 2.70 (s, 3H); <sup>13</sup>C NMR (100 MHz, CDCl<sub>3</sub>): δ 145.3, 142.3, 139.5, 132.2, 130.4, 128.2, 127.8, 123.2, 118.2, 117.9, 116.9, 111.3, 110.9, 105.6, 30.3; HRMS (ESI, m/z) Calcd for C<sub>15</sub>H<sub>14</sub>N<sub>3</sub>O<sub>2</sub> 268.1081 (M+H), found 268.1084.

**2-(5-chloro-1*H*-indol-1-yl)-*N*,4-dimethylaniline (23):**

Pale yellow oil, <sup>1</sup>H NMR (400 MHz, CDCl<sub>3</sub>): δ 7.56 (s, 1H), 7.13-7.03 (m, 3H), 6.94-6.90 (m, 2H), 6.68 (d, *J* = 8.4 Hz, 1H), 6.53 (d, *J* = 3.2 Hz, 1H), 2.65 (s, 3H), 2.21 (s, 3H); <sup>13</sup>C NMR (100 MHz, CDCl<sub>3</sub>): δ 142.8, 135.0, 130.35, 130.32, 129.6, 128.9, 126.8, 126.0, 124.3, 122.6, 120.3, 111.9, 111.7, 102.8, 30.8, 20.3; HRMS (ESI, m/z) Calcd for C<sub>16</sub>H<sub>15</sub>N<sub>2</sub>Cl 271.0997 (M+H), found 271.0996.

**4-*tert*-butyl-2-(5-chloro-1*H*-indol-1-yl)-*N*-methylaniline (24):**

Light orange oil, <sup>1</sup>H NMR (400 MHz, CDCl<sub>3</sub>): δ 7.56 (s, 1H), 7.30 (dd, *J* = 1.2 Hz, 8.4 Hz, 1H), 7.14-7.13 (m, 1H), 7.08 (s, 1H), 7.03 (d, *J* = 8.8 Hz, 1H), 6.93 (d, *J* = 8.8 Hz, 1H), 6.68 (d, *J* = 8.4 Hz, 1H), 6.53 (d, *J* = 2.8 Hz, 1H), 3.51 (br, 1H), 2.64 (s, 3H), 1.21 (s, 9H); <sup>13</sup>C NMR (100 MHz, CDCl<sub>3</sub>): δ 142.9, 140.2, 135.1, 130.3, 129.6, 126.5, 125.9, 125.3, 123.9, 122.6, 120.3, 112.0, 111.1, 102.7, 34.0, 31.6, 30.6; HRMS (ESI, m/z) Calcd for C<sub>19</sub>H<sub>22</sub>N<sub>2</sub>Cl 313.1486 (M+H), found 313.1479.

**2-(5-chloro-1*H*-indol-1-yl)-*N*,4,6-trimethylaniline (25):**

Orange oil, <sup>1</sup>H NMR (400 MHz, CDCl<sub>3</sub>): δ 7.55 (s, 1H), 7.14 (d, *J* = 3.2 Hz, 1H), 7.057-7.031 (m, 1H), 6.98-6.95 (m, 2H), 6.80 (s, 1H), 6.52 (d, *J* = 2.8 Hz, 1H), 2.25 (s, 3H), 2.19 (s, 6H); <sup>13</sup>C NMR



(100 MHz, CDCl<sub>3</sub>):  $\delta$  135.8, 132.1, 130.5, 130.4, 129.4, 128.9, 128.1, 127.7, 127.3, 125.8, 122.5, 120.2, 111.9, 102.6, 34.5, 20.4, 18.7; HRMS (ESI, m/z) Calcd for C<sub>17</sub>H<sub>18</sub>N<sub>2</sub>Cl 285.1153 (M+H), found 285.1155.

**2-(5-methoxy-1*H*-indol-1-yl)-*N*,4-dimethylaniline (26):**

Colorless oil, <sup>1</sup>H NMR (400 MHz, CDCl<sub>3</sub>):  $\delta$  7.085-7.064 (m, 3H), 6.92-6.90 (m, 2H), 6.75 (d, *J* = 8.8 Hz, 1H), 6.62 (d, *J* = 8 Hz, 1H), 6.51 (d, *J* = 2.8 Hz, 1H), 3.78 (s, 3H), 3.38 (br, 1H), 2.66 (s, 3H), 2.20 (s, 3H); <sup>13</sup>C NMR (100 MHz, CDCl<sub>3</sub>):  $\delta$  154.6, 143.4, 131.9, 129.9, 129.5, 129.0, 128.8, 126.0, 124.6, 112.4, 111.6, 111.0, 102.8, 102.6, 56.0, 30.6, 20.2; HRMS (ESI, m/z) Calcd for C<sub>17</sub>H<sub>19</sub>N<sub>2</sub>O 267.1492 (M+H), found 267.1497.

**2-(5-methoxy-1*H*-indol-1-yl)-*N*,4,6-trimethylaniline (27):**

Colorless oil, <sup>1</sup>H NMR (400 MHz, CDCl<sub>3</sub>):  $\delta$  7.08 (d, *J* = 2.8 Hz, 1H), 7.05 (s, 1H), 6.97-6.93 (m, 2H), 6.81 (s, 1H), 6.75 (s, 1H), 6.50 (d, *J* = 2.8 Hz, 1H), 3.78 (s, 3H), 2.71 (br, 1H), 2.25 (d, *J* = 2.0 Hz, 6H), 2.18 (s, 3H); <sup>13</sup>C NMR (100 MHz, CDCl<sub>3</sub>):  $\delta$  154.5, 143.1, 132.7, 131.8, 130.1, 129.6, 128.8, 128.7, 127.7, 127.3, 112.4, 111.5, 102.6, 102.4, 55.9, 34.7, 20.4, 18.8; HRMS (ESI, m/z) Calcd for C<sub>18</sub>H<sub>21</sub>N<sub>2</sub>O 281.1648 (M+H), found 281.1663.

**4-*tert*-butyl-2-(5-methoxy-1*H*-indol-1-yl)-*N*-methylaniline (28):**

Light brown oil, <sup>1</sup>H NMR (400 MHz, CDCl<sub>3</sub>):  $\delta$  7.37 (dd, *J* = 1.6 Hz, 8.4 Hz 1H), 7.19-7.16 (m, 3H), 7.02 (d, *J* = 8.8 Hz, 1H), 6.86-6.84 (m, 1H), 6.75 (d, *J* = 8.4 Hz, 1H), 6.61 (d, *J* = 2.4 Hz, 1H), 3.88 (s, 3H), 3.50 (br, 1H), 2.76 (s, 3H), 1.30 (s, 9H); <sup>13</sup>C NMR (100 MHz, CDCl<sub>3</sub>):  $\delta$  154.6, 143.2, 139.8, 131.9, 129.5, 129.0, 126.1, 125.4, 124.3, 112.5, 111.7, 110.6, 102.7, 102.6, 56.0, 34.0, 31.6, 30.6; HRMS (ESI, m/z) Calcd for C<sub>20</sub>H<sub>25</sub>N<sub>2</sub>O 309.1961 (M+H), found 309.1964.

***N*,4-dimethyl-2-(3-methyl-1*H*-indol-1-yl)aniline (29):**

White solid, Mp: 55-57 °C, <sup>1</sup>H NMR (400 MHz, CDCl<sub>3</sub>):  $\delta$  7.54 (d, *J* = 7.6 Hz, 1H), 7.09-7.05 (m, 3H), 6.99-6.97 (m, 1H), 6.89 (s, 1H), 6.86 (s, 1H), 6.62 (d, *J* = 8 Hz, 1H), 3.40 (br, 1H), 2.65 (s, 3H), 2.30 (s, 3H), 2.19 (s, 3H); <sup>13</sup>C NMR (100 MHz, CDCl<sub>3</sub>):  $\delta$  143.5, 136.9, 129.7, 129.0, 128.9, 126.4, 126.0, 124.8, 122.2, 119.5, 119.0, 112.3, 111.0, 110.7, 30.6, 20.3, 9.7; HRMS (ESI, m/z) Calcd for C<sub>17</sub>H<sub>19</sub>N<sub>2</sub> 251.1543 (M+H), found 251.1543.

***N*,4-dimethyl-2-(1*H*-pyrrolo[2,3-*b*]pyridin-1-yl)aniline (30):**

Colorless oil, <sup>1</sup>H NMR (400 MHz, CDCl<sub>3</sub>): δ 8.33 (d, *J* = 4.4 Hz, 1H), 7.98 (d, *J* = 8 Hz, 1H), 7.29 (d, *J* = 3.4 Hz, 1H), 7.17 (d, *J* = 8 Hz, 1H), 7.13-7.10 (m, 1H), 7.01 (s, 1H), 6.77 (d, *J* = 8.4 Hz, 1H), 6.63 (d, *J* = 3.6 Hz, 1H), 3.74 (br, 1H), 2.77 (s, 3H), 2.30 (s, 3H); <sup>13</sup>C NMR (100 MHz, CDCl<sub>3</sub>): δ 148.1, 143.9, 143.4, 130.2, 129.8, 129.2, 129.0, 126.6, 124.2, 120.9, 116.4, 111.8, 101.4, 30.8, 20.3; HRMS (ESI, *m/z*) Calcd for C<sub>15</sub>H<sub>16</sub>N<sub>3</sub> 238.1349 (M+H), found 251.1339.

***N*-methyl-2-(1*H*-pyrrol-1-yl)aniline (34):**

Colorless oil, <sup>1</sup>H NMR (400 MHz, CDCl<sub>3</sub>): δ 7.30-7.26 (m, 1H), 7.14 (d, *J* = 8 Hz, 1H), 6.80 (s, 2H), 6.75-6.71 (m, 2H), 6.34 (s, 2H), 3.84 (br, 1H), 2.80 (s, 3H); <sup>13</sup>C NMR (100 MHz, CDCl<sub>3</sub>): δ 144.9, 129.1, 127.2, 127.0, 122.0, 116.3, 110.6, 109.4, 30.4; HRMS (ESI, *m/z*) Calcd for C<sub>11</sub>H<sub>13</sub>N<sub>2</sub> 173.1073 (M+H), found 173.1077.

***N*,4-dimethyl-2-(1*H*-pyrrol-1-yl)aniline (35):**

Colorless oil, <sup>1</sup>H NMR (400 MHz, CDCl<sub>3</sub>): δ 7.01 (d, *J* = 8 Hz, 1H), 6.88 (s, 1H), 6.70 (d, *J* = 1.2 Hz, 2H), 6.55 (d, *J* = 8.4 Hz, 1H), 6.25 (s, 2H), 3.60 (br, 1H), 2.69 (s, 3H), 2.19 (s, 3H); <sup>13</sup>C NMR (100 MHz, CDCl<sub>3</sub>): δ 142.6, 129.4, 127.6, 127.2, 125.9, 122.0, 110.8, 109.3, 30.7, 20.2; HRMS (ESI, *m/z*) Calcd for C<sub>12</sub>H<sub>15</sub>N<sub>2</sub> 187.1232 (M+H), found 187.1230.

**4-isopropyl-*N*-methyl-2-(1*H*-pyrrol-1-yl)aniline (36):**

Pale orange oil, <sup>1</sup>H NMR (400 MHz, CDCl<sub>3</sub>): δ 7.15 (dd, *J* = 2.4 Hz, 8.8 Hz, 1H), 7.02 (d, *J* = 2 Hz, 1H), 6.81 (t, *J* = 2 Hz, 2H), 6.67 (d, *J* = 8.4 Hz, 1H), 6.34 (t, *J* = 2 Hz, 2H), 3.71 (br, 1H), 2.86 (m, 1H), 2.81 (s, 3H), 1.24 (s, 3H), 1.22 (s, 3H); <sup>13</sup>C NMR (100 MHz, CDCl<sub>3</sub>): δ 142.8, 137.3, 128.2, 126.8, 125.0, 122.0, 110.7, 109.3, 33.1, 30.6, 24.3; HRMS (ESI, *m/z*) Calcd for C<sub>14</sub>H<sub>19</sub>N<sub>2</sub> 215.1543 (M+H), found 215.1553.

**4-chloro-*N*-methyl-2-(1*H*-pyrrol-1-yl)aniline (37):**

Pale yellow oil, <sup>1</sup>H NMR (400 MHz, CDCl<sub>3</sub>): δ 7.23 (dd, *J* = 2.4 Hz, 8.8 Hz, 1H), 7.12 (d, *J* = 2 Hz, 1H), 6.77 (t, *J* = 2 Hz, 2H), 6.62 (d, *J* = 8.4 Hz, 1H), 6.34 (t, *J* = 2 Hz, 2H), 3.85 (br, 1H), 2.78 (s, 3H); <sup>13</sup>C NMR (100 MHz, CDCl<sub>3</sub>): δ 143.6, 128.8, 127.8, 126.9, 121.8, 120.7, 111.4, 109.9, 30.4; HRMS (ESI, *m/z*) Calcd for C<sub>11</sub>H<sub>12</sub>N<sub>2</sub>Cl 207.0684 (M+H), found 207.0687.

#### 4-fluoro-*N*-methyl-2-(1*H*-pyrrol-1-yl)aniline (38):

Colorless oil, <sup>1</sup>H NMR (400 MHz, CDCl<sub>3</sub>): δ 7.03-6.98 (m, 1H), 6.91 (dd, *J* = 2.8 Hz, 8.8 Hz, 1H), 6.79 (t, *J* = 2 Hz, 2H), 6.64-6.60 (m, 1H), 6.34 (t, *J* = 2 Hz, 2H), 3.70 (br, 1H), 2.77 (s, 3H); <sup>13</sup>C NMR (100 MHz, CDCl<sub>3</sub>): δ 155.6, 153.3, 141.4, 127.3, 127.2, 121.8, 115.3, 115.1, 114.4, 114.1, 111.1, 111.0, 109.8, 30.9; HRMS (ESI, *m/z*) Calcd for C<sub>11</sub>H<sub>12</sub>N<sub>2</sub>F 191.0979 (M+H), found 191.0979.

#### 4-(methylamino)-3-(1*H*-pyrrol-1-yl)benzonitrile (39):

Light orange oil, <sup>1</sup>H NMR (400 MHz, CDCl<sub>3</sub>): δ 7.53 (dd, *J* = 2.0 Hz, 8.8 Hz, 1H), 7.37 (d, *J* = 2 Hz, 1H), 6.73 (t, *J* = 2 Hz, 2H), 6.67 (d, *J* = 8.8 Hz, 1H), 6.36 (t, *J* = 2 Hz, 2H), 4.42 (br, 1H), 2.84 (d, *J* = 5.2 Hz, 3H); <sup>13</sup>C NMR (100 MHz, CDCl<sub>3</sub>): δ 148.3, 133.6, 130.6, 126.8, 121.7, 119.6, 110.5, 110.3, 98.1, 29.9; HRMS (ESI, *m/z*) Calcd for C<sub>12</sub>H<sub>11</sub>N<sub>3</sub>Na 220.0851 (M+H), found 207.0862.

#### Synthesis of 2-(1*H*-indol-1-yl)-*N*-phenylaniline (31):

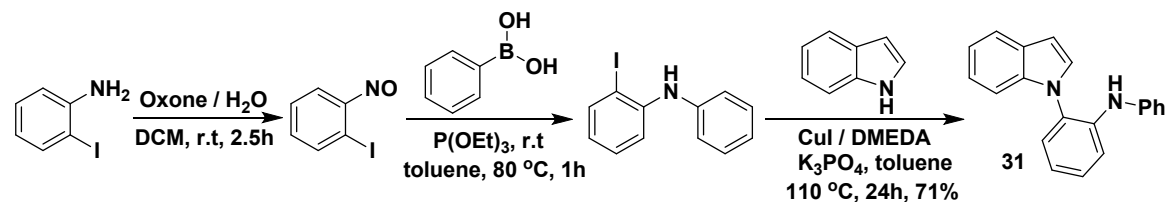

First 2-iodoaniline converted into 1-iodo-2-nitrosobenzene.<sup>D</sup> 1-iodo-2-nitrosobenzene treated with phenylboronic acid to get 2-iodo-*N*-phenylaniline.<sup>E</sup> 2-(1*H*-indol-1-yl)-*N*-phenylaniline was synthesized from 2-iodo-*N*-phenylaniline using general procedure IV.<sup>A</sup>

#### Spectral data of 31:

Light orange oil, <sup>1</sup>H NMR (400 MHz, CDCl<sub>3</sub>): δ 7.61 (d, *J* = 6.4 Hz, 1H), 7.34 (d, *J* = 8.4 Hz, 1H), 7.23-7.07 (m, 8H), 6.93 (d, *J* = 8.0 Hz, 2H), 6.89-6.85 (m, 2H), 6.61 (d, *J* = 2.4 Hz, 1H), 5.33 (br, 1H); <sup>13</sup>C NMR (100 MHz, CDCl<sub>3</sub>): δ 141.7, 140.5, 136.7, 129.4, 128.9, 128.8, 127.1, 122.6, 122.5, 121.1, 120.5, 120.2, 120.0, 116.1, 110.7, 103.8; HRMS (ESI, *m/z*) Calcd for C<sub>15</sub>H<sub>16</sub>N<sub>3</sub> 285.1392 (M+H), found 285.1397.

**Synthesis of 2-(1H-imidazol-1-yl)-N-methylaniline (32) & 2-(1H-benzo[d]imidazol-1-yl)-N-methylaniline (33):**

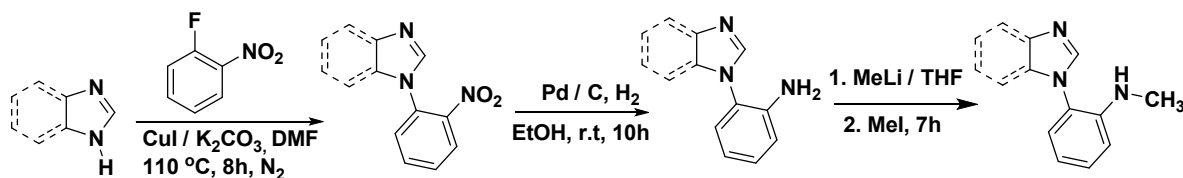

Compound **32** and **33** are synthesized by methylation<sup>B</sup> of corresponding anilines. 2-(1H-imidazol-1-yl)aniline and 2-(1H-benzo[d]imidazol-1-yl)aniline were prepared using reported procedure.<sup>F</sup>

**Spectral data**

**2-(1H-imidazol-1-yl)-N-methylaniline (32):**

White solid, Mp: 78-80 °C, <sup>1</sup>H NMR (400 MHz, CDCl<sub>3</sub>): δ 7.59 (s, 1H), 7.35-7.31 (m, 1H), 7.26-7.23 (m, 1H), 7.09-7.08 (m, 2H), 6.76-6.73 (m, 2H), 3.65 (br, 1H), 2.79 (d, *J* = 3.6 Hz, 3H); <sup>13</sup>C NMR (100 MHz, CDCl<sub>3</sub>): δ 144.6, 130.3, 130.1, 127.1, 127.0, 123.0, 120.5, 116.6, 111.0, 30.3; HRMS (ESI, *m/z*) Calcd for C<sub>10</sub>H<sub>12</sub>N<sub>3</sub> 174.1031 (M+H), found 174.1053.

**2-(1H-benzo[d]imidazol-1-yl)-N-methylaniline (33):**

White crystalline solid, Mp: 157-159 °C, <sup>1</sup>H NMR (400 MHz, CDCl<sub>3</sub>): δ 7.97 (s, 1H), 7.88 (d, *J* = 8.4 Hz, 1H), 7.43-7.39 (m, 1H), 7.35-7.28 (m, 2H), 7.20-7.15 (m, 2H), 6.84-6.79 (m, 2H), 3.54 (br, 1H), 2.78 (d, *J* = 4.8 Hz, 3H); 145.2, 143.68, 143.62, 134.2, 130.7, 128.1, 123.7, 122.8, 120.9, 120.6, 116.8, 111.2, 110.9, 30.2; HRMS (ESI, *m/z*) Calcd for C<sub>14</sub>H<sub>14</sub>N<sub>3</sub> 224.1188 (M+H), found 224.1187.

**References:**

- A. 1) Antilla, J. C.; Klapars, A.; Buchwald, S. L. *J. Am. Chem. Soc.* **2002**, *124*, 11684. 2) Wang, X.; Li, N.; Li, Z.; Rao, H. *J. Org. Chem.* **2017**, *82*, 10158. 3) Wang, L.; Guo, W.; Zhang, X. X.; Xia, X.-D.; Xiao, W. –*J. Org. Lett.* **2012**, *14*, 740.
- B. Nakamura, I.; Sato, Y.; Konta, S.; Terada, M. *Tetrahedron Letters.* **2009**, *50*, 2075.
- C. Baumann, M.; Baxendale, I. R. *J. Org. Chem.* **2015**, *80*, 10806.
- D. Purkait, A.; Roy, S. K.; Srivastava, H. K.; Jana, C. K. *Org. Lett.* **2017**, *19*, 2540.
- E. Roscales, S.; Csaky, A. G.; *Org. Lett.* **2018**, *20*, 1667.
- F. Wang, X.; Jin, Y.; Zhao, Y.; Zhu, L.; Fu, H. *Org. Lett.* **2012**, *14*, 452.

## X. NMR Spectra of the reaction products

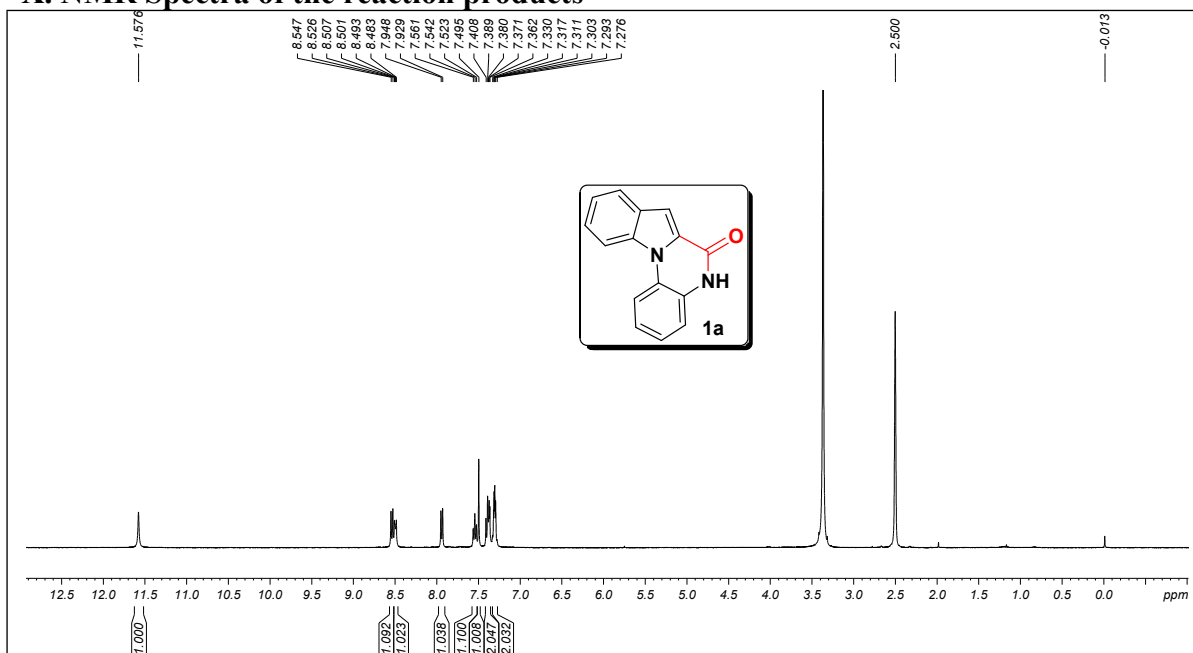

Figure S1. 400 MHz <sup>1</sup>H NMR spectrum of **1a** in DMSO-d<sub>6</sub>

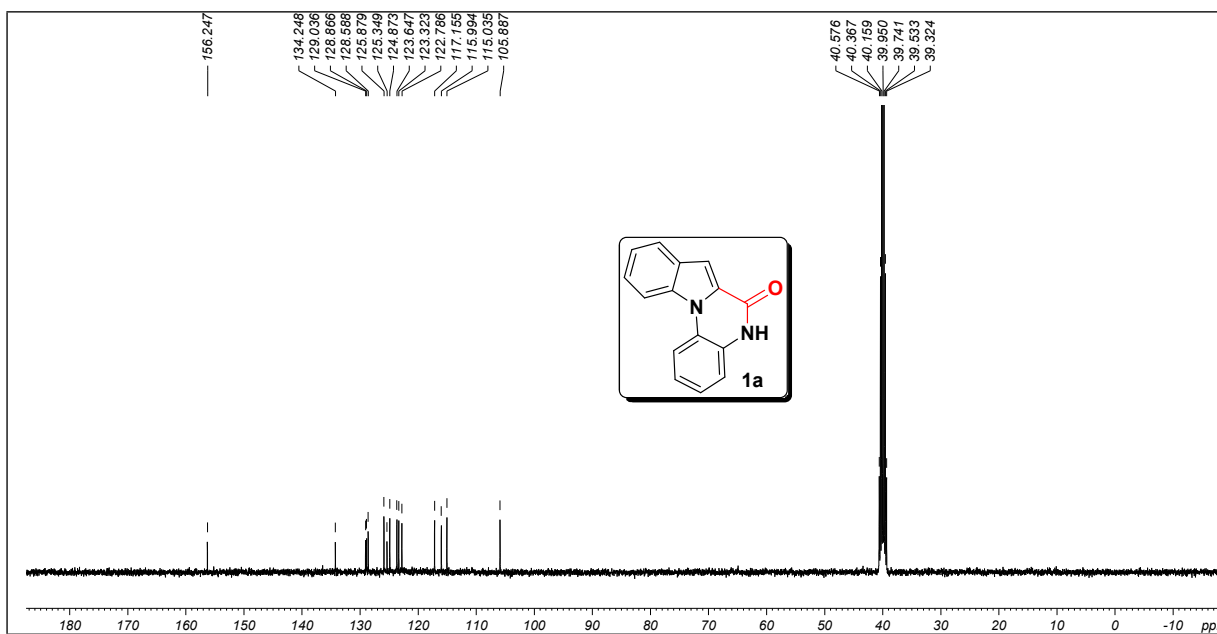

Figure S2. 100 MHz <sup>13</sup>C NMR spectrum of **1a** in DMSO-d<sub>6</sub>

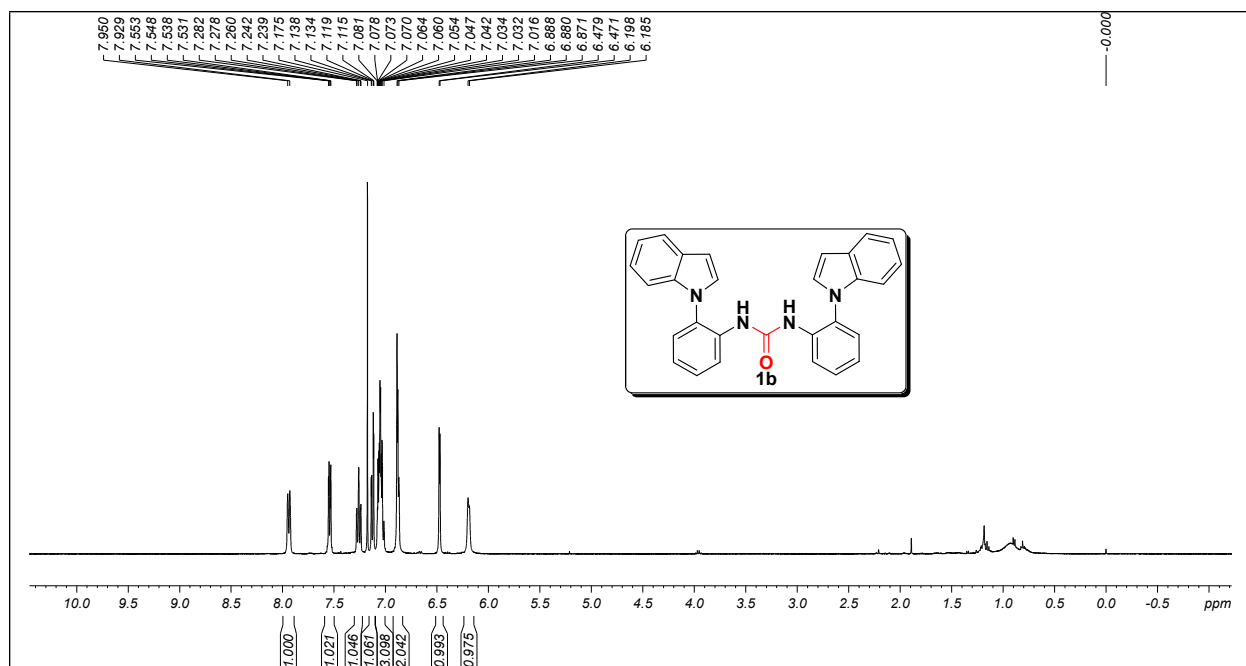

Figure S3. 400 MHz  $^1\text{H}$  NMR spectrum of **1b** in  $\text{CDCl}_3$

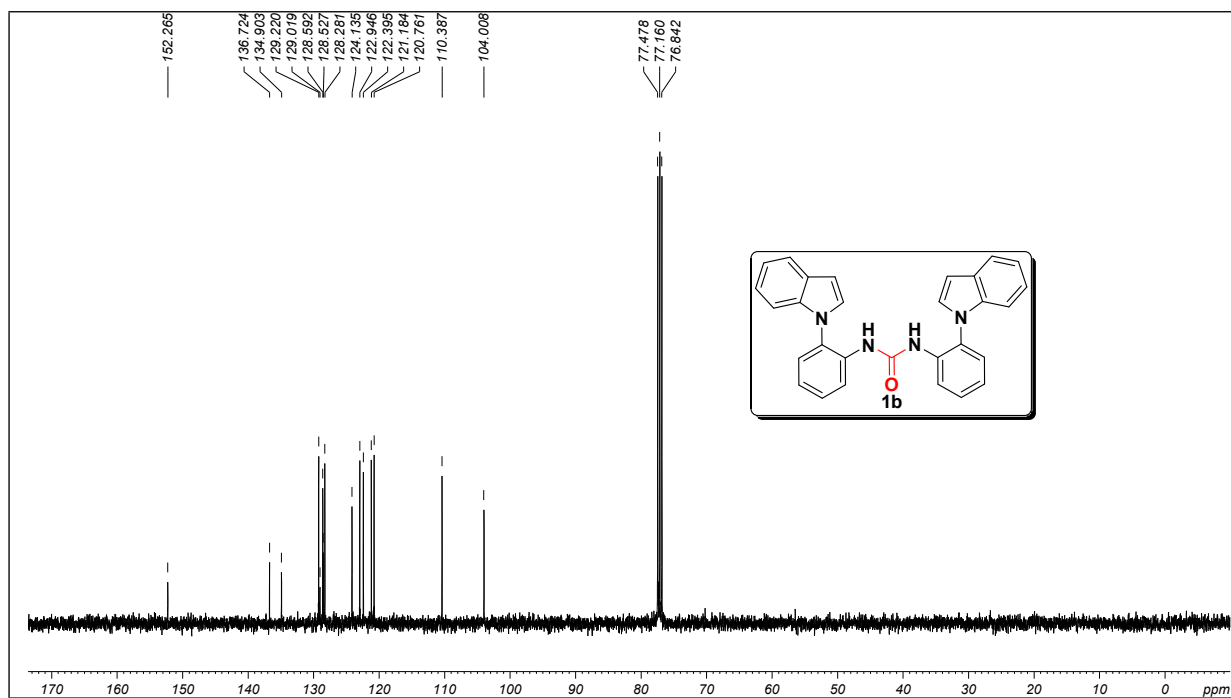

Figure S4. 100 MHz  $^{13}\text{C}$  NMR spectrum of **1b** in  $\text{CDCl}_3$

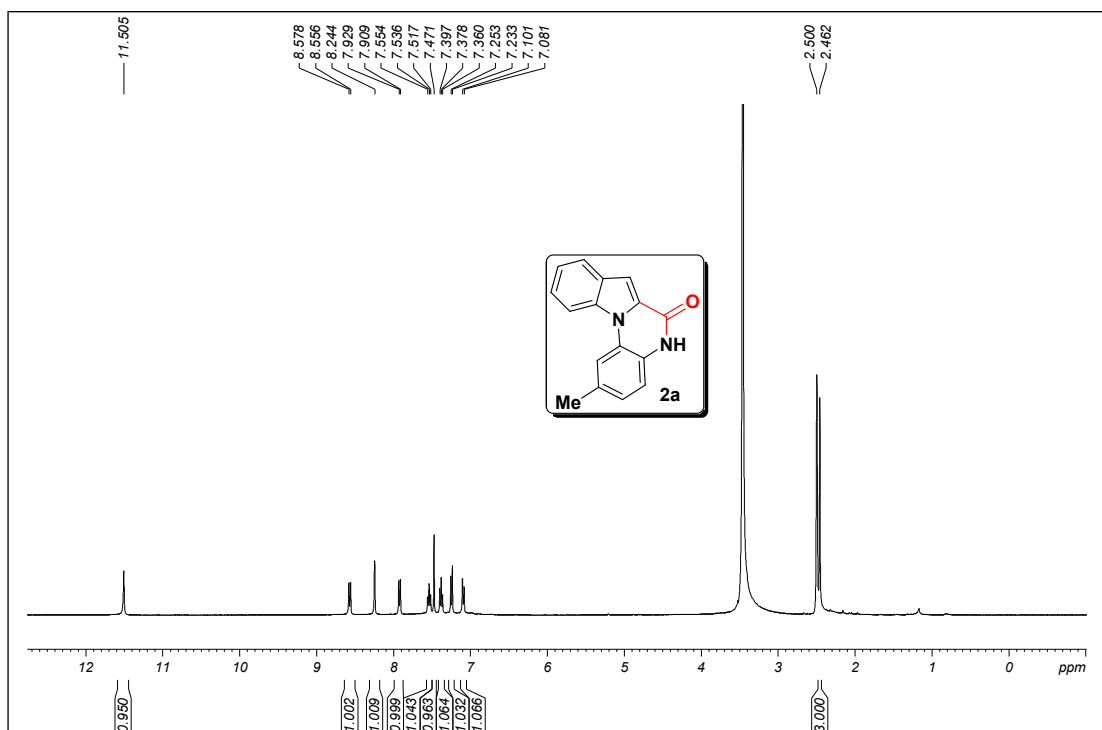

Figure S5. 400 MHz  $^1\text{H}$  NMR spectrum of **2a** in  $\text{DMSO-d}_6$

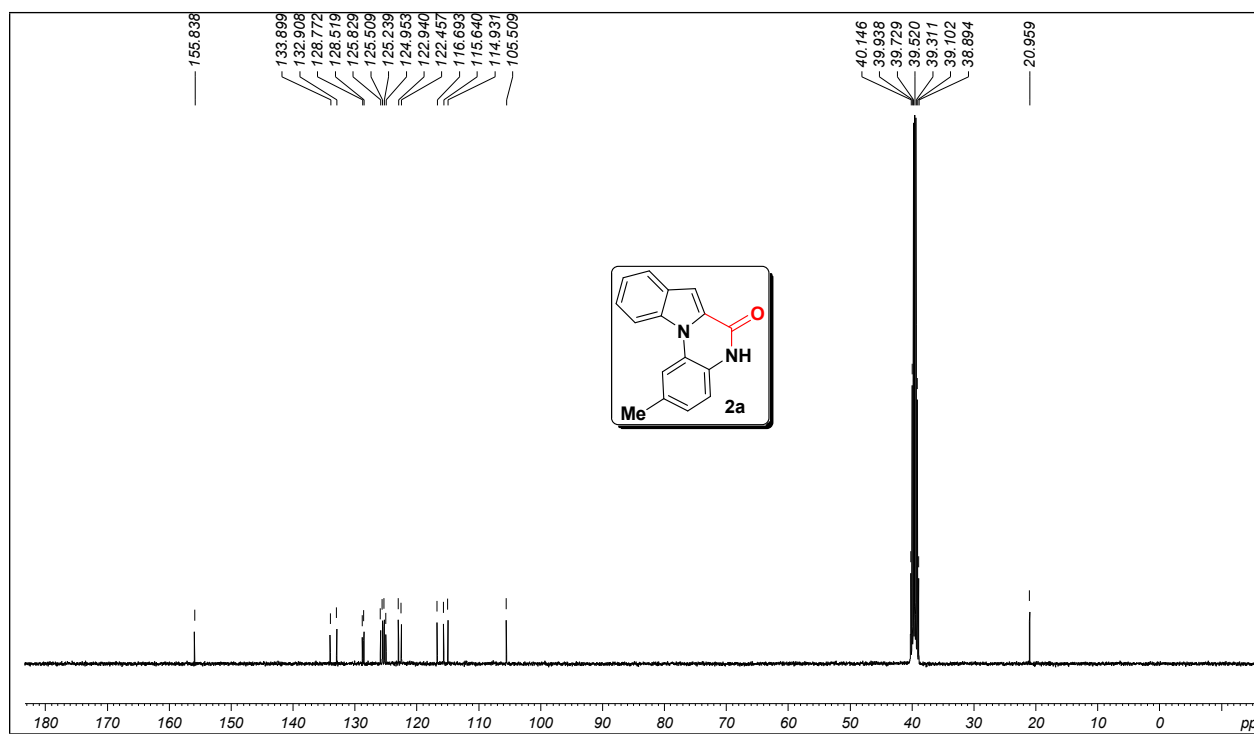

Figure S6. 100 MHz  $^{13}\text{C}$  NMR spectrum of **2a** in  $\text{DMSO-d}_6$

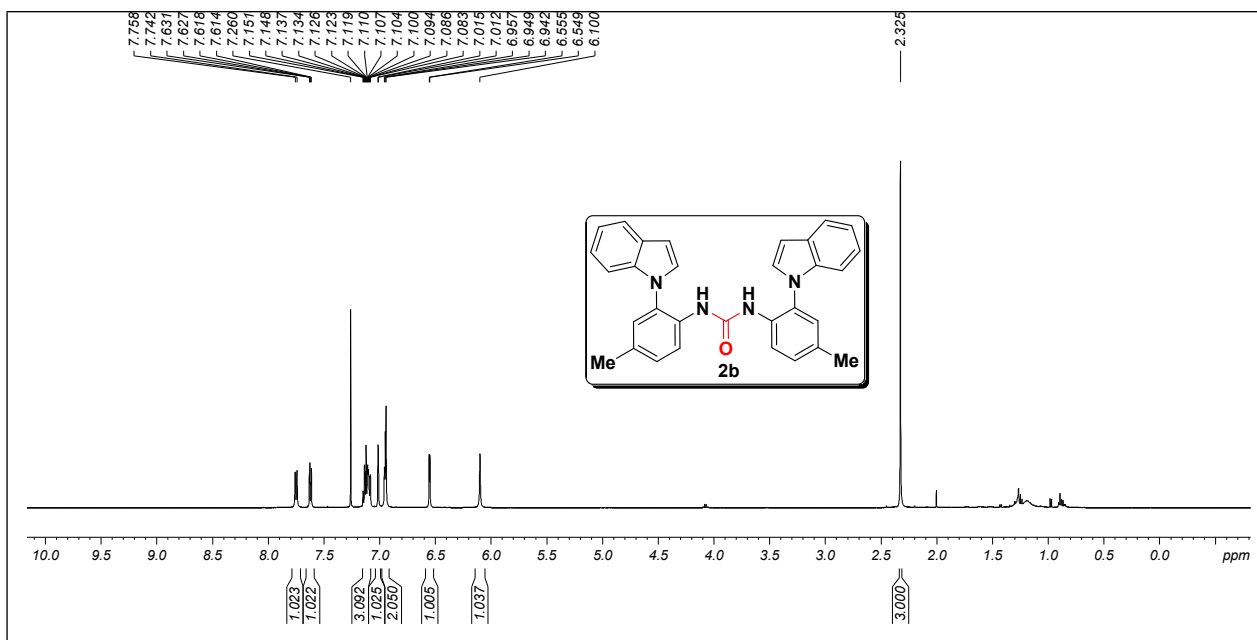

**Figure S7.** 500 MHz  $^1\text{H}$  NMR spectrum of **2b** in  $\text{CDCl}_3$

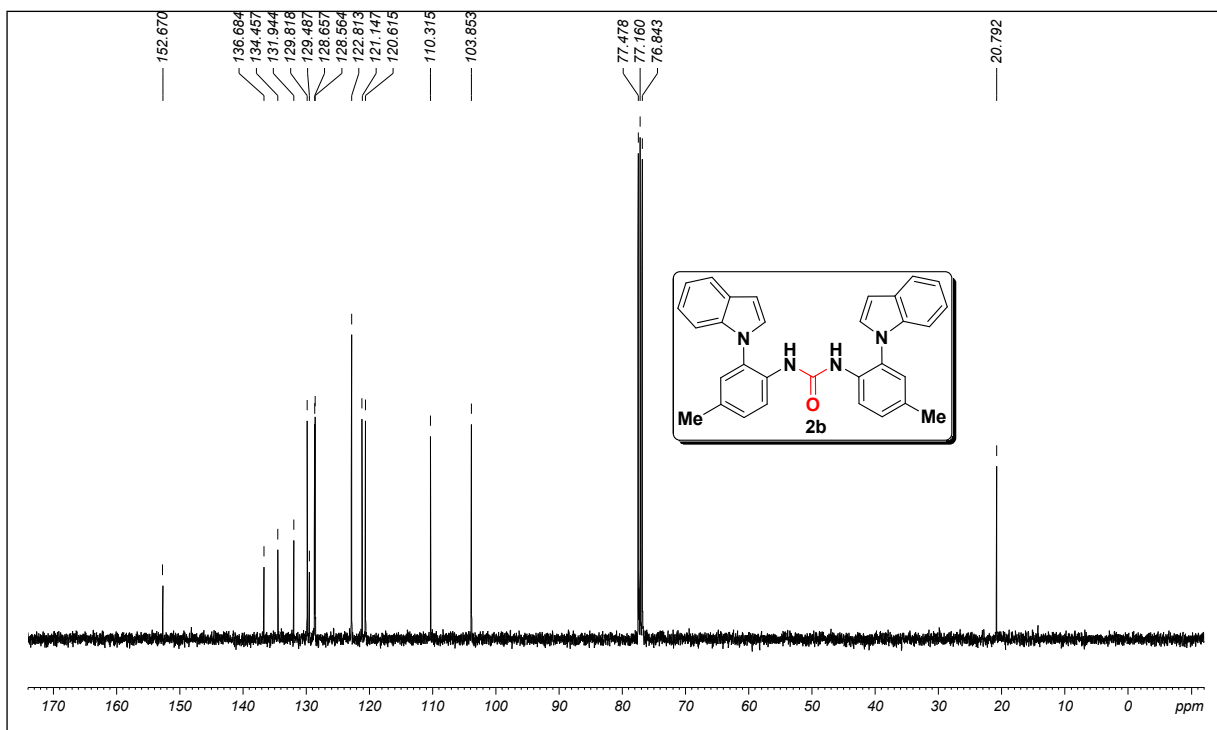

**Figure S8.** 100 MHz  $^{13}\text{C}$  NMR spectrum of **2b** in  $\text{CDCl}_3$



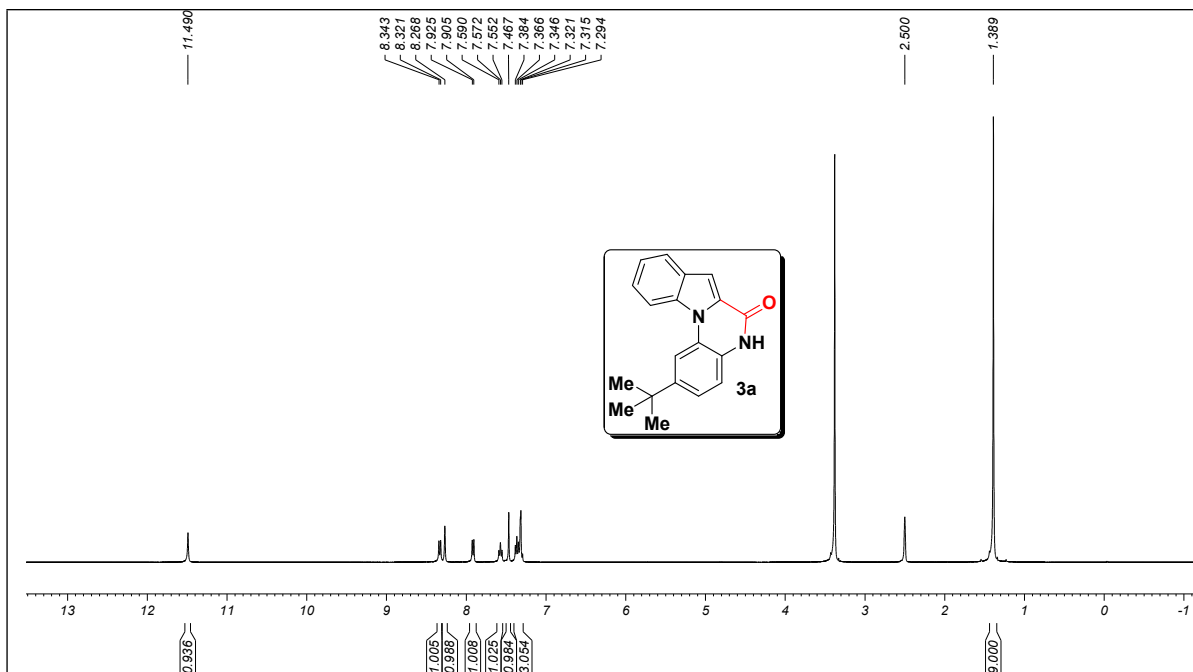

Figure S9. 400 MHz  $^1\text{H}$  NMR spectrum of **3a** in  $\text{DMSO-d}_6$

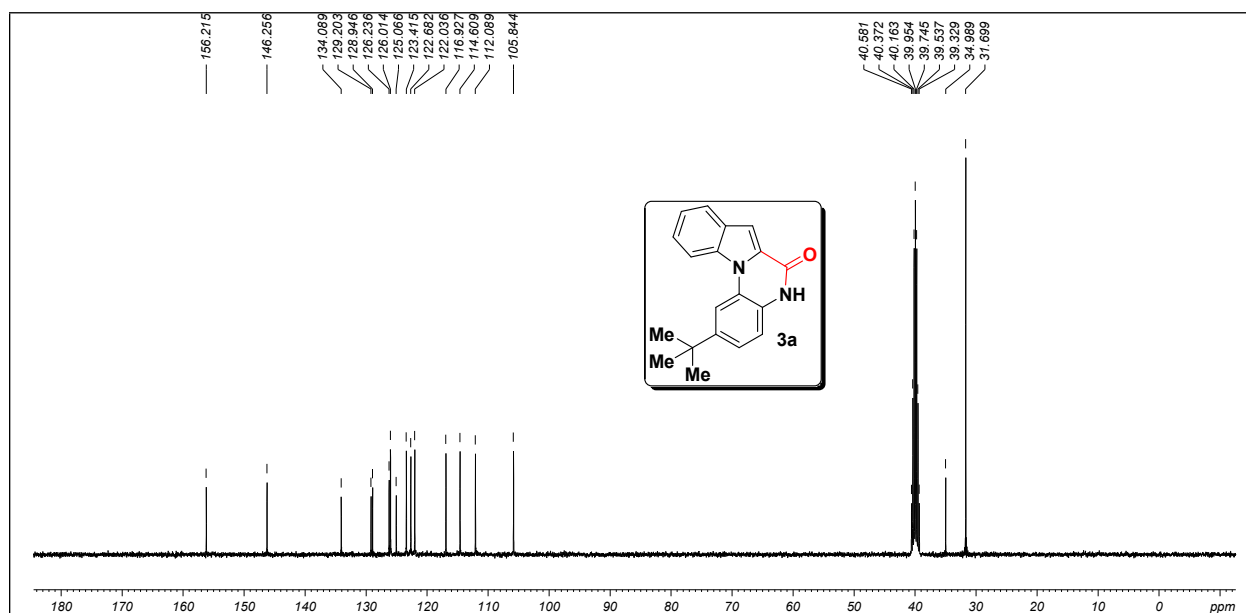

Figure S10. 100 MHz  $^{13}\text{C}$  NMR spectrum of **3a** in  $\text{DMSO-d}_6$

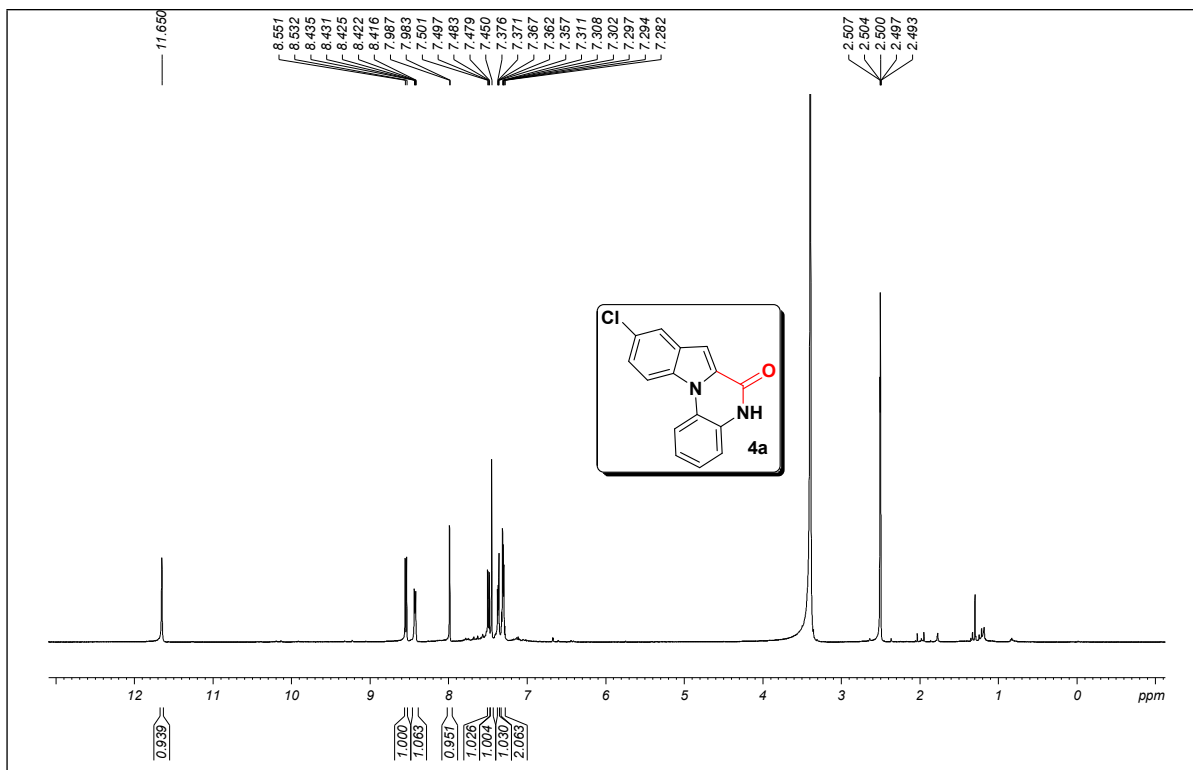

Figure S11. 500 MHz  $^1\text{H}$  NMR spectrum of **4a** in  $\text{DMSO-d}_6$

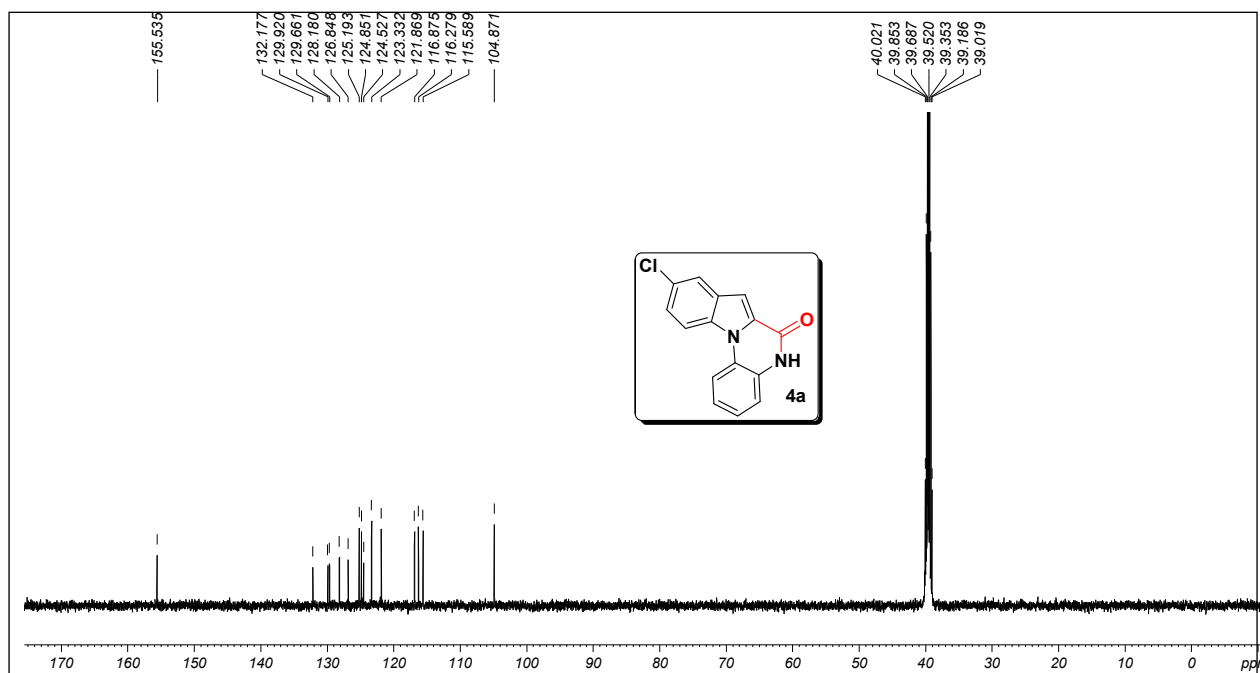

Figure S12. 125 MHz  $^{13}\text{C}$  NMR spectrum of **4a** in  $\text{DMSO-d}_6$

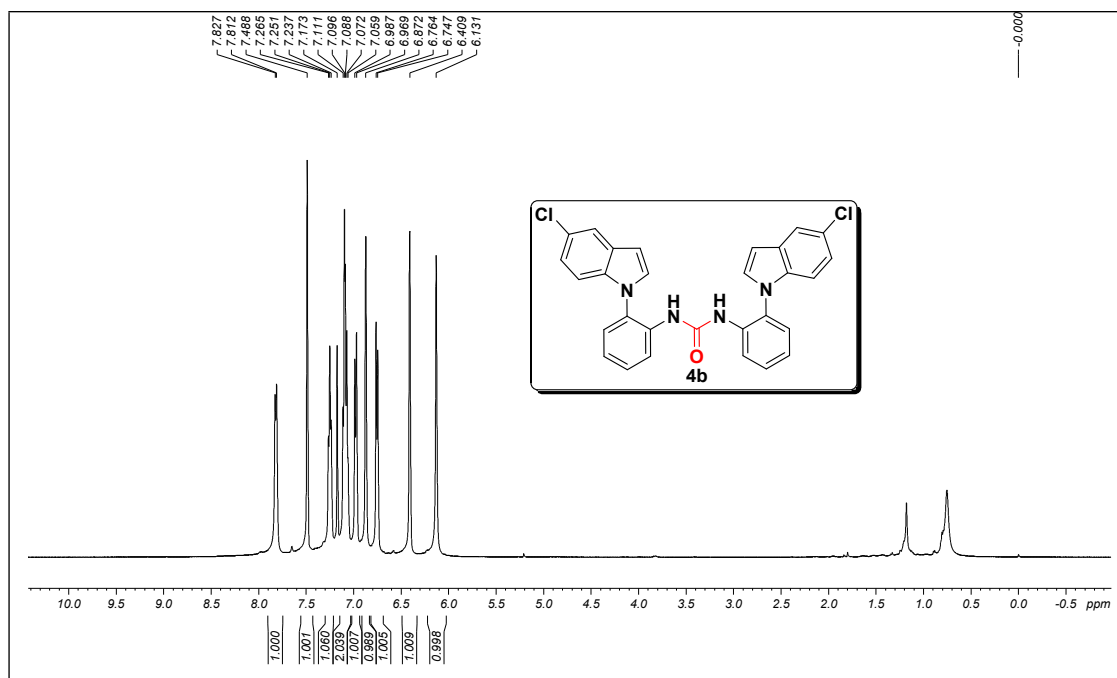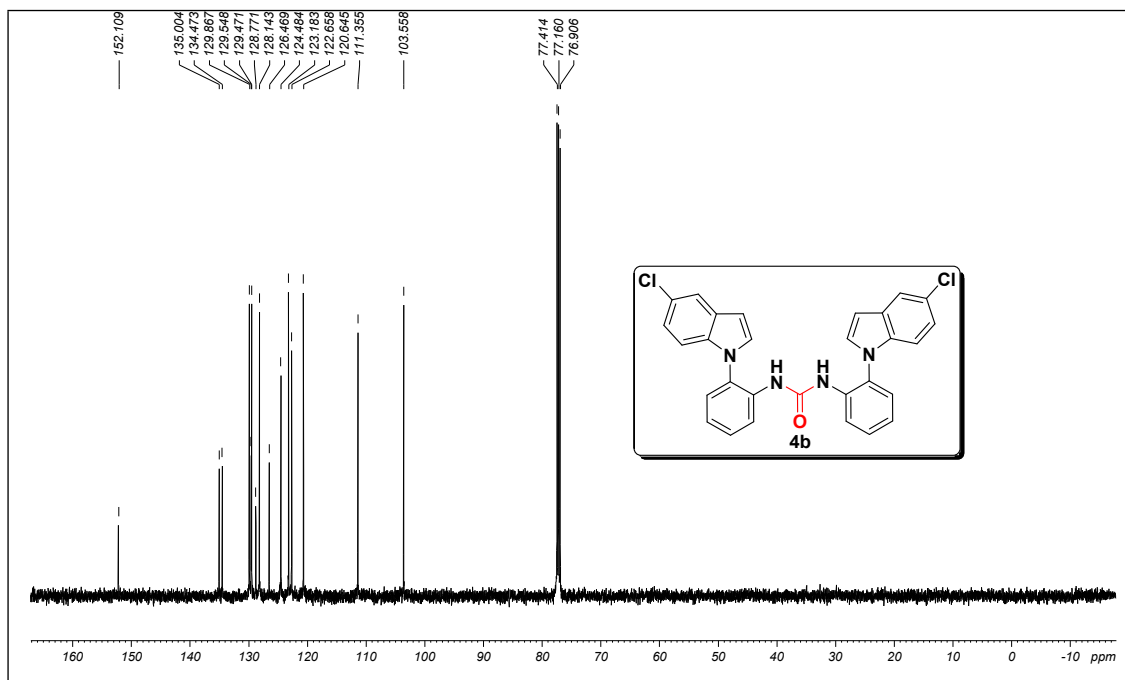

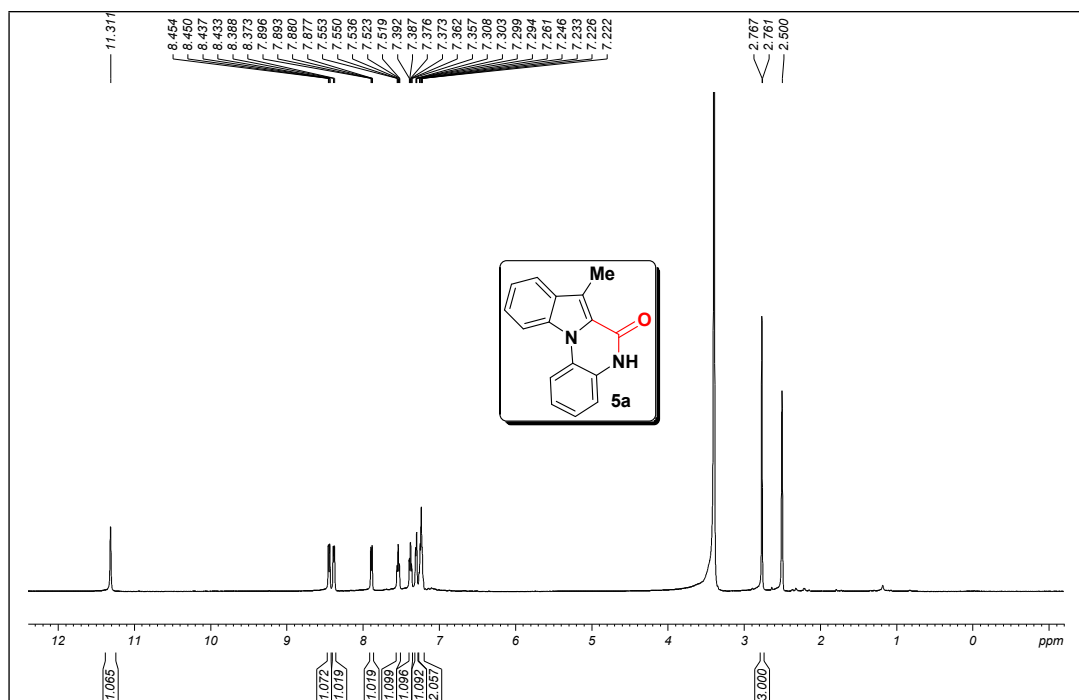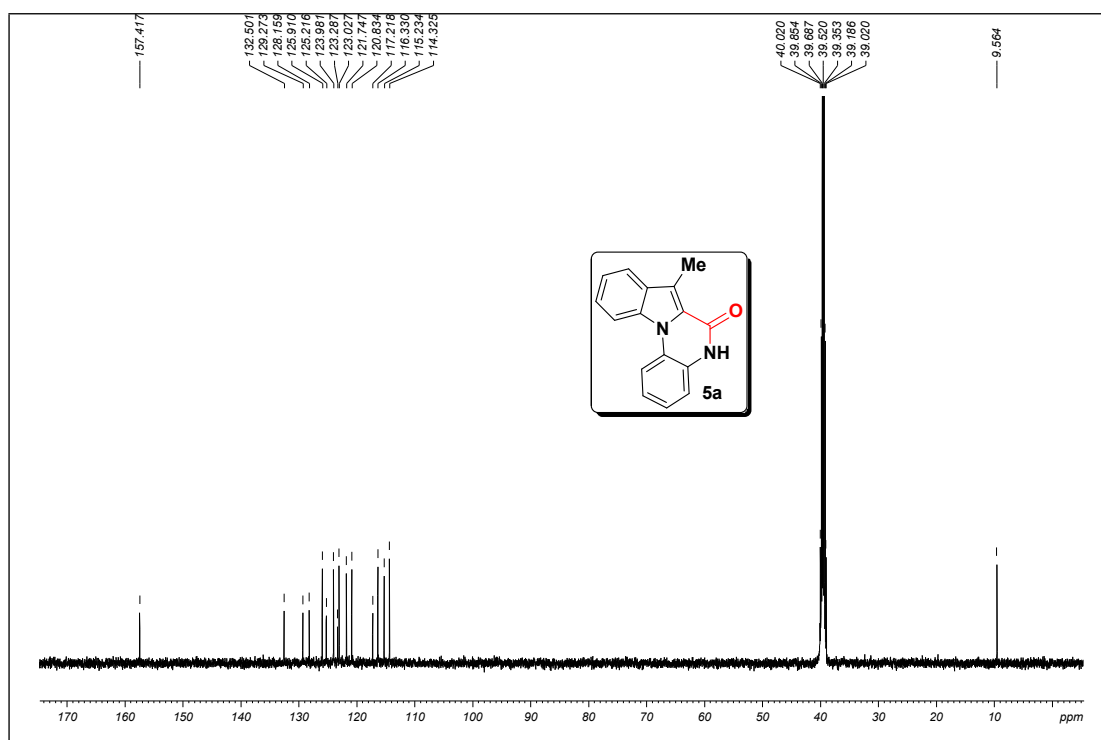

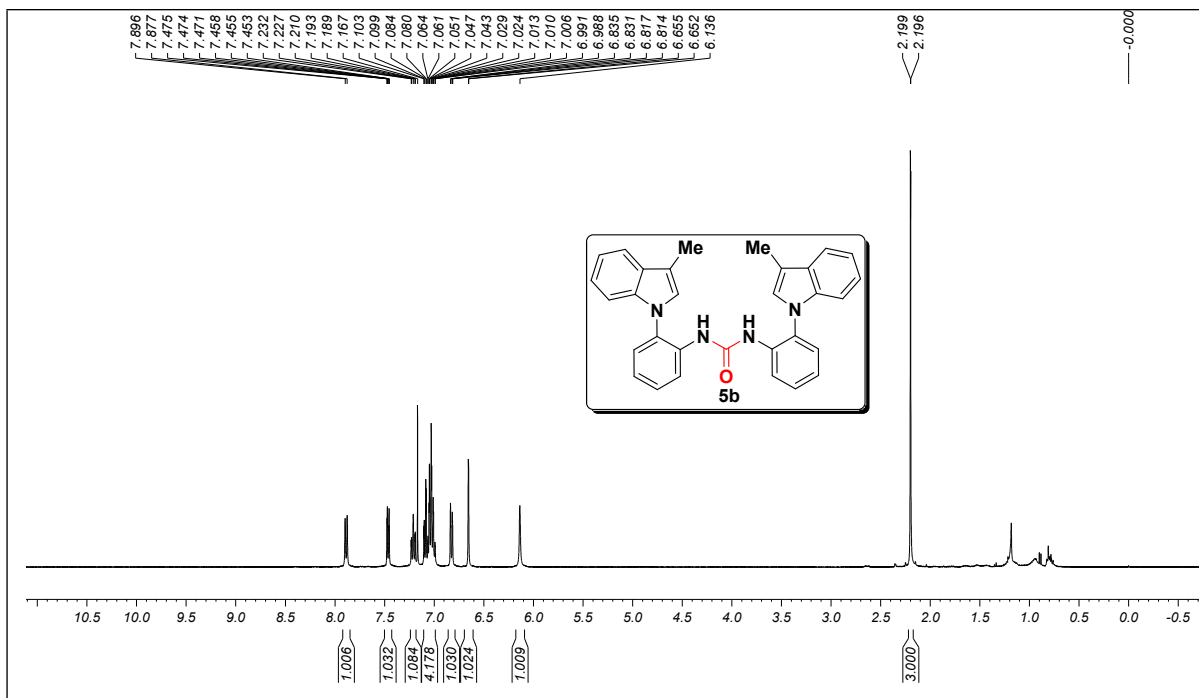

Figure S17. 400 MHz  $^1\text{H}$  NMR spectrum of **5b** in  $\text{CDCl}_3$

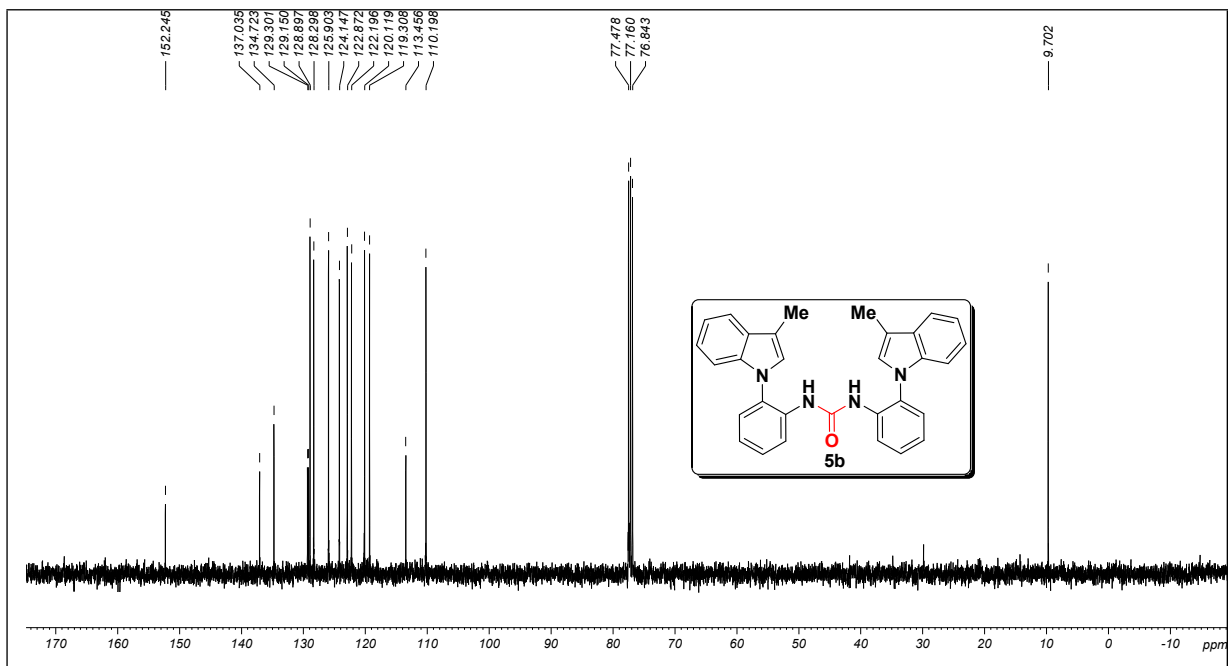

Figure S18. 100 MHz  $^{13}\text{C}$  NMR spectrum of **5b** in  $\text{CDCl}_3$

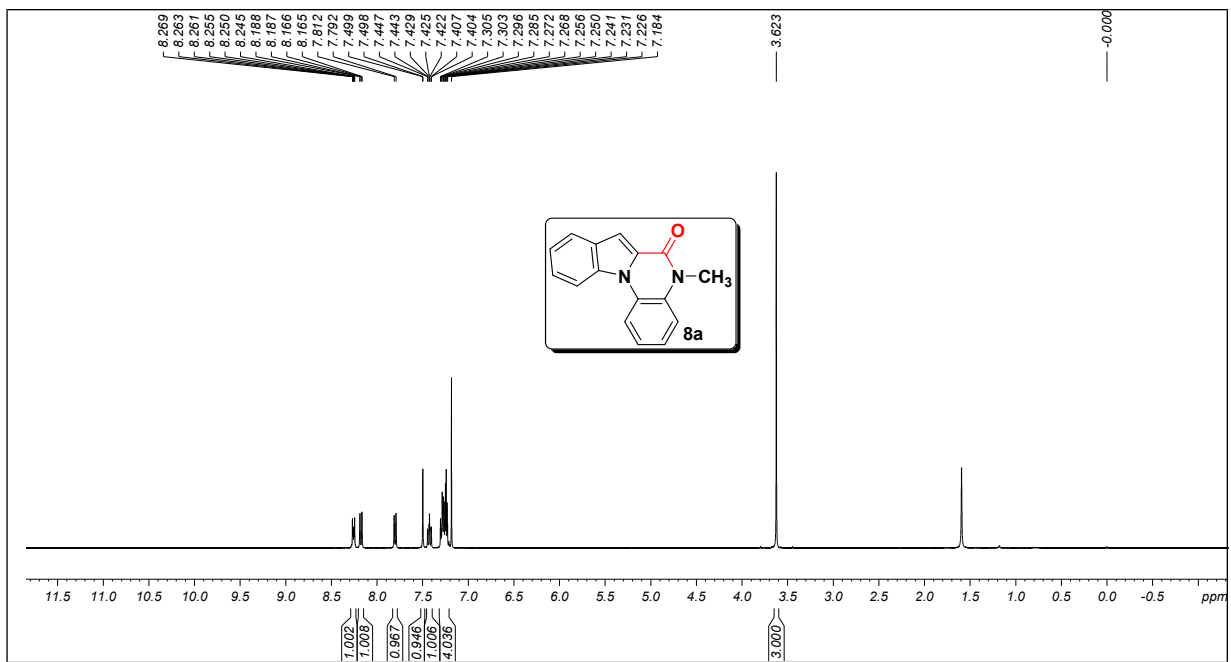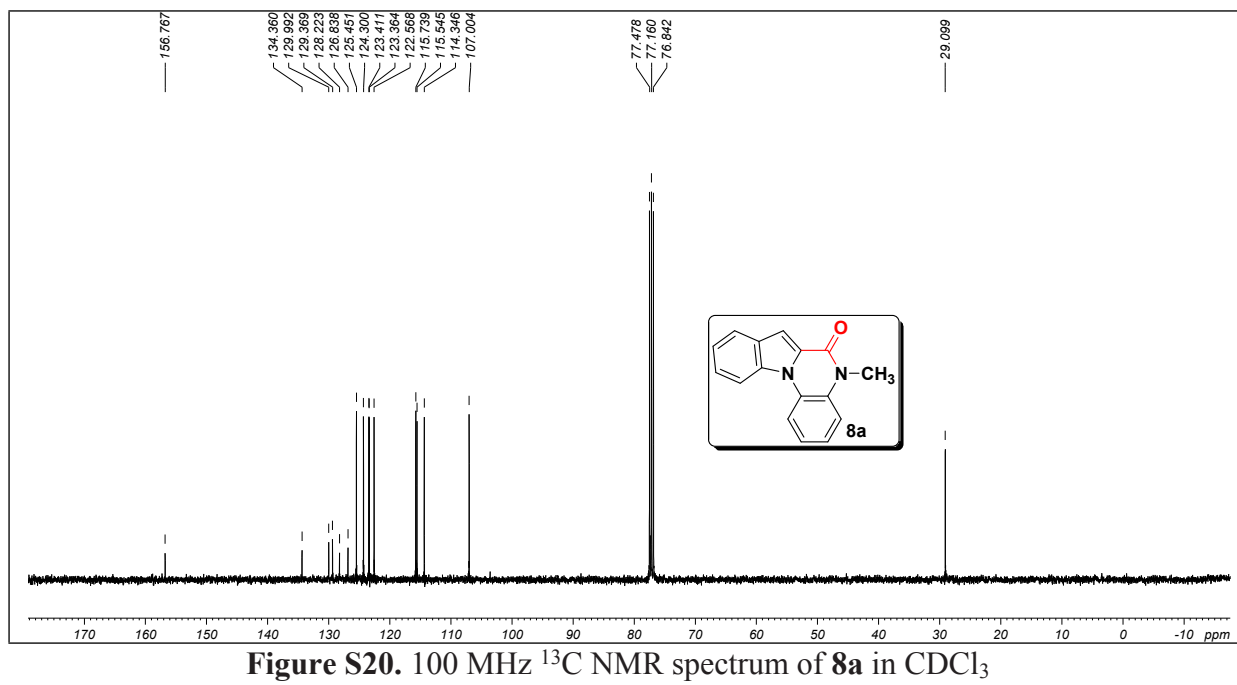

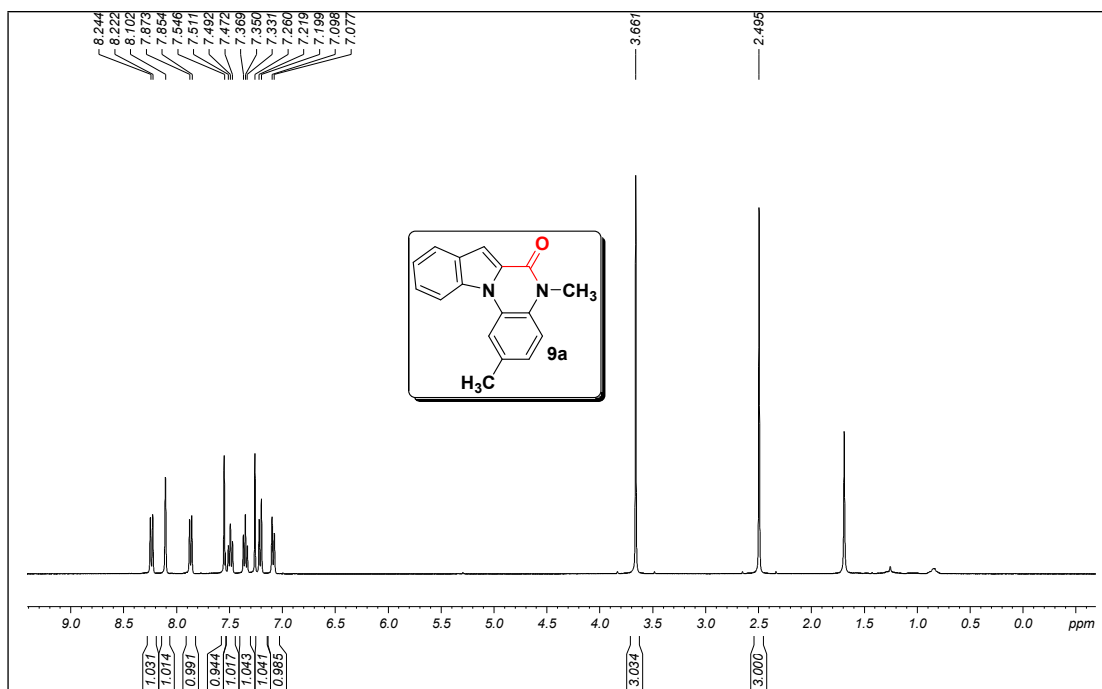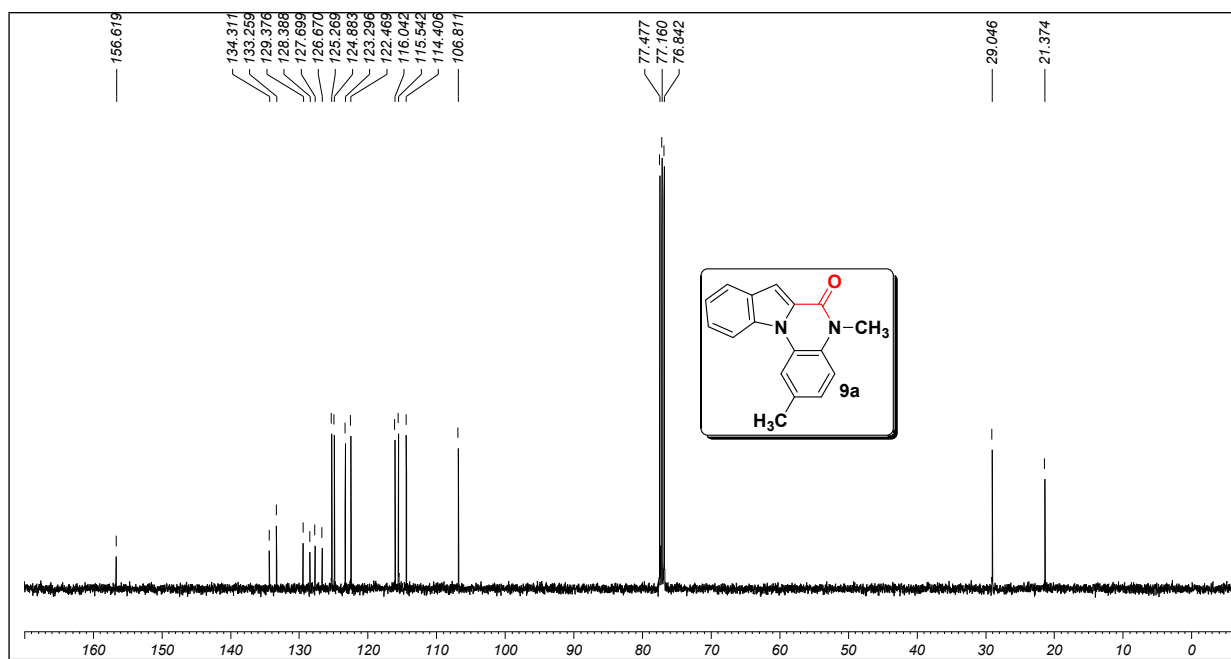

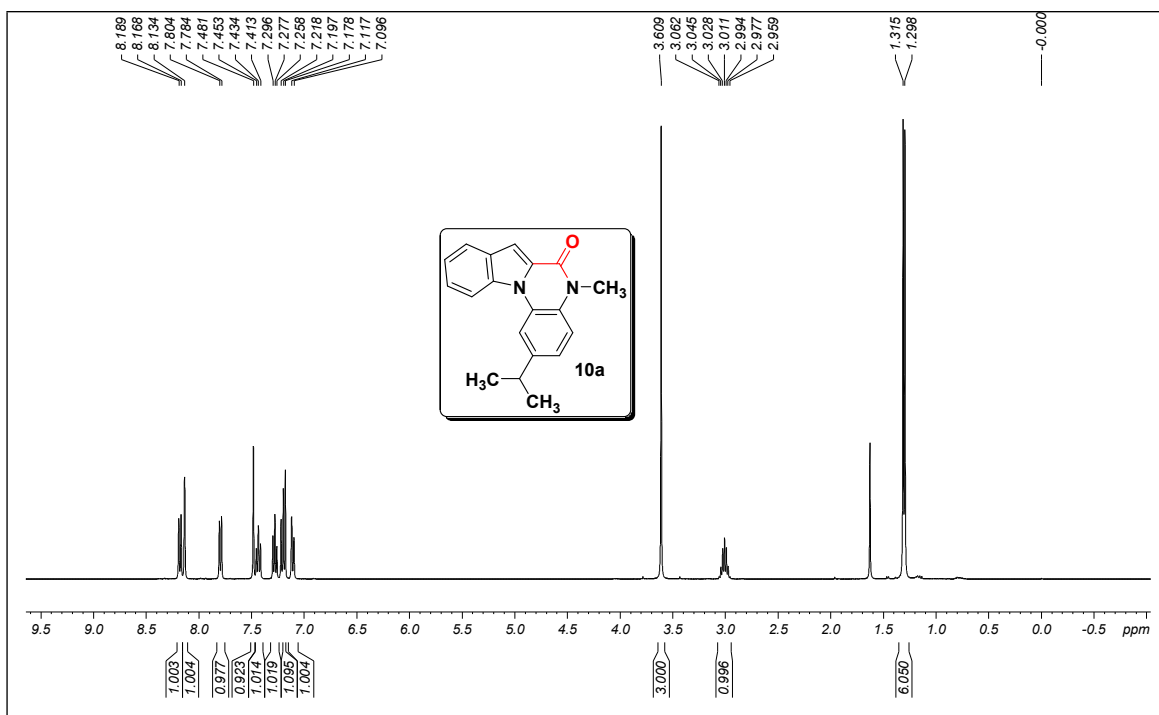

Figure S23. 400 MHz <sup>1</sup>H NMR spectrum of **10a** in CDCl<sub>3</sub>

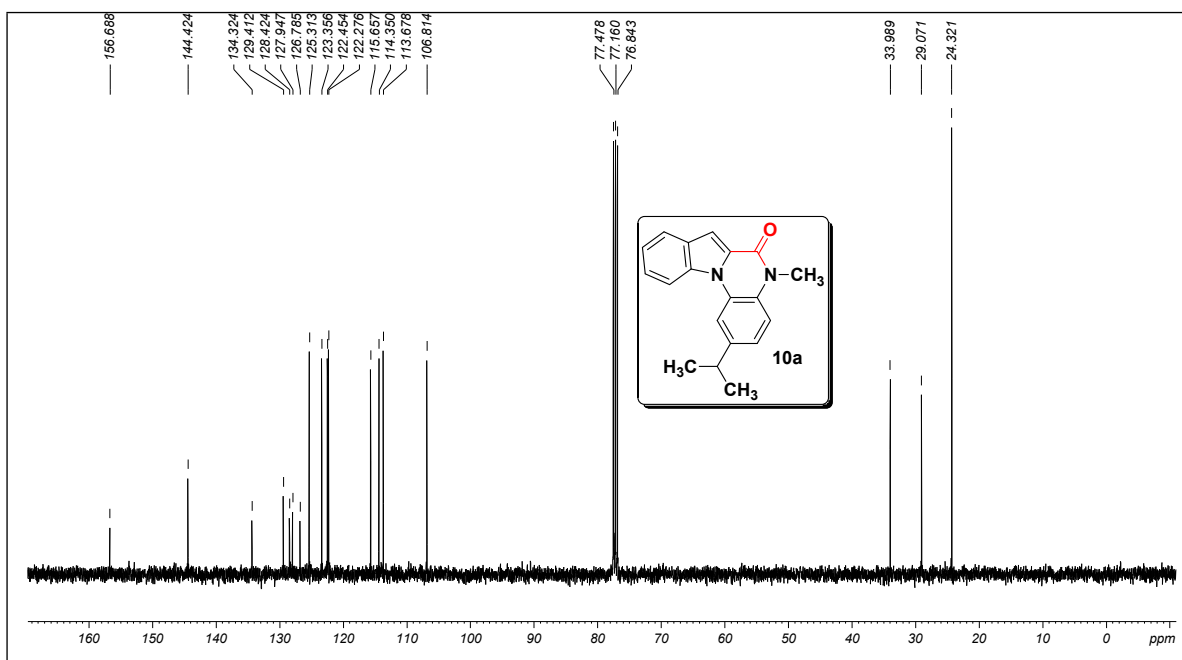

Figure S24. 100 MHz <sup>13</sup>C NMR spectrum of **10a** in CDCl<sub>3</sub>



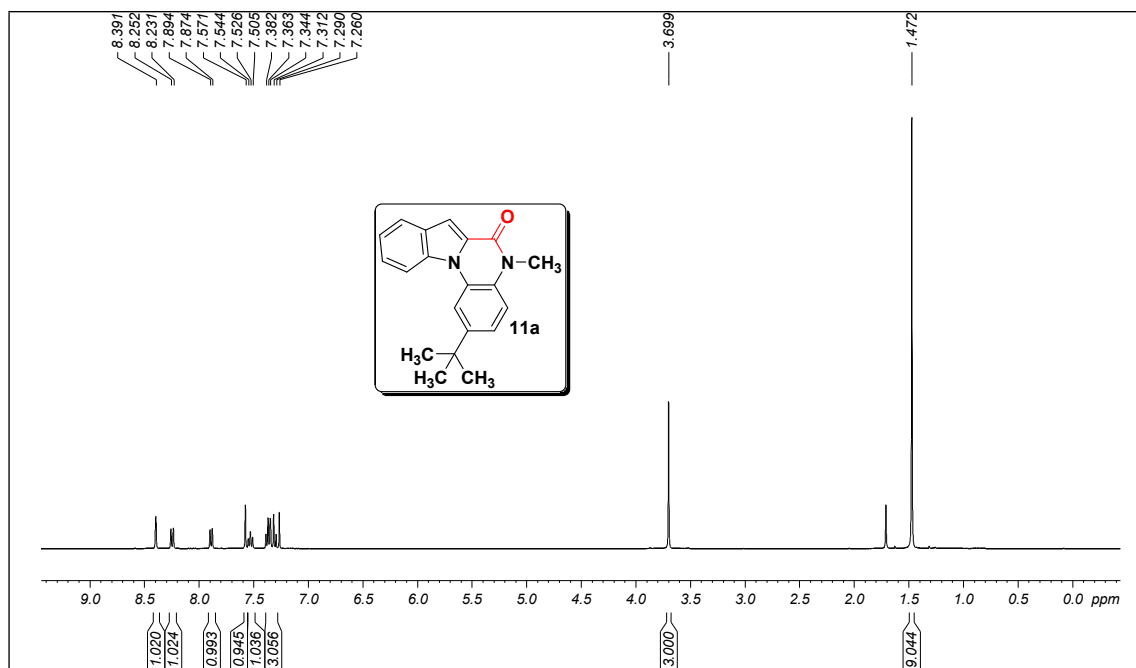

Figure S25. 400 MHz <sup>1</sup>H NMR spectrum of 11a in CDCl<sub>3</sub>

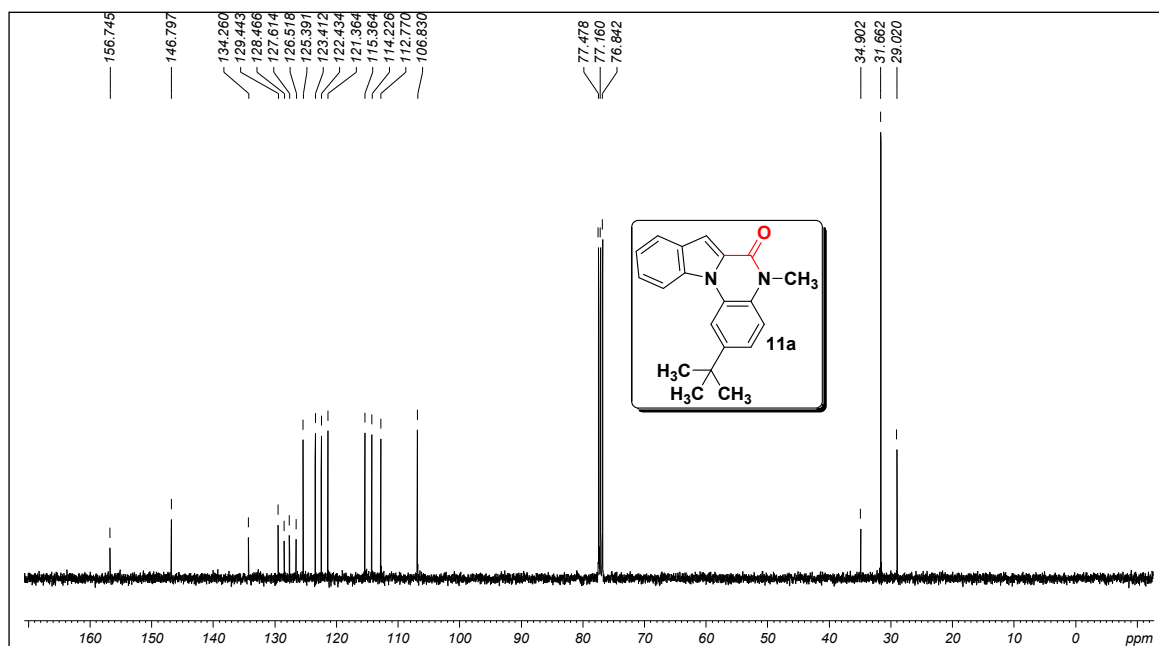

Figure S26. 100 MHz <sup>13</sup>C NMR spectrum of 11a in CDCl<sub>3</sub>

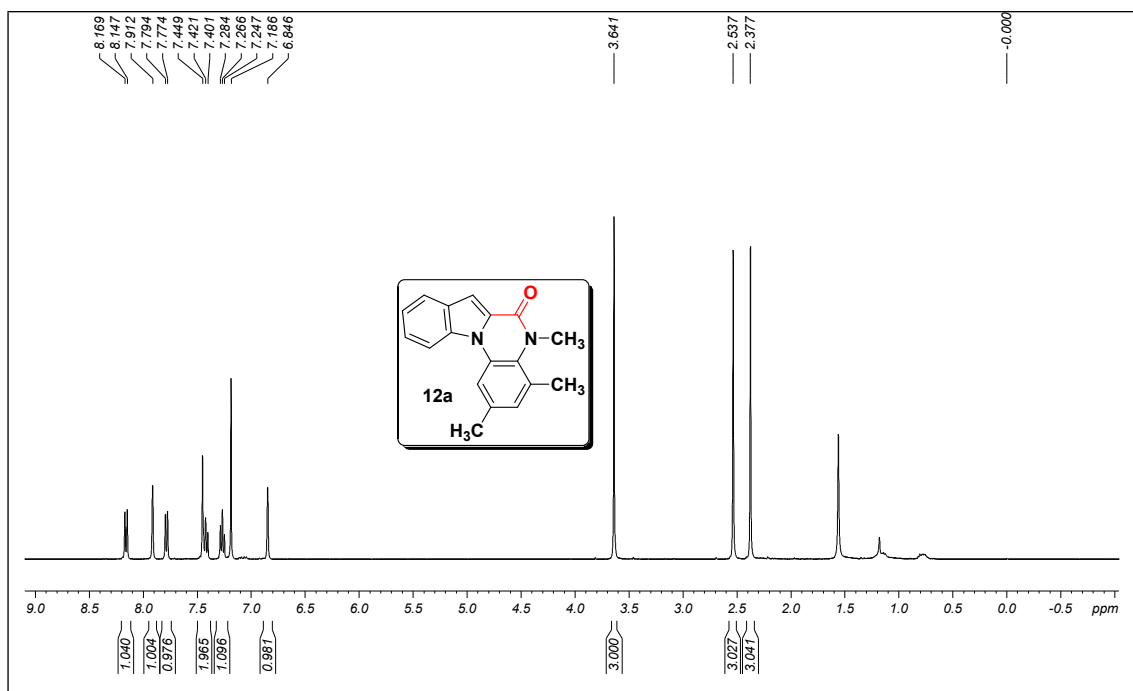

Figure S27. 400 MHz  $^1\text{H}$  NMR spectrum of **12a** in  $\text{CDCl}_3$

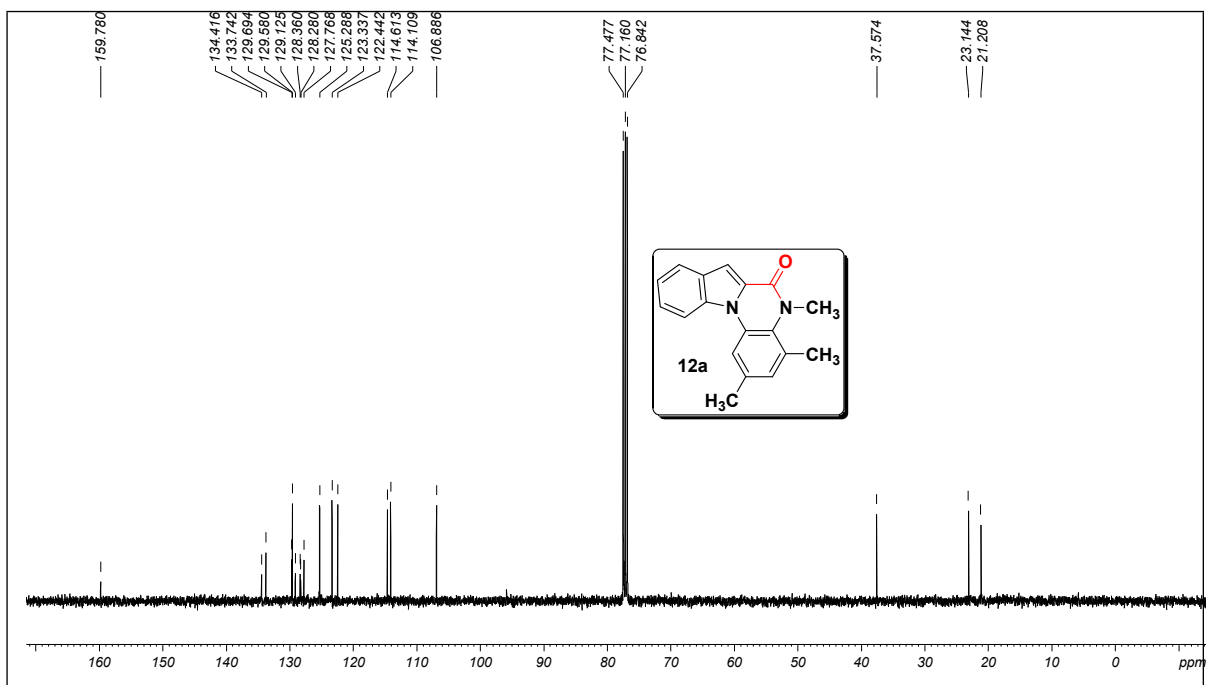

Figure S28. 100 MHz  $^{13}\text{C}$  NMR spectrum of **12a** in  $\text{CDCl}_3$

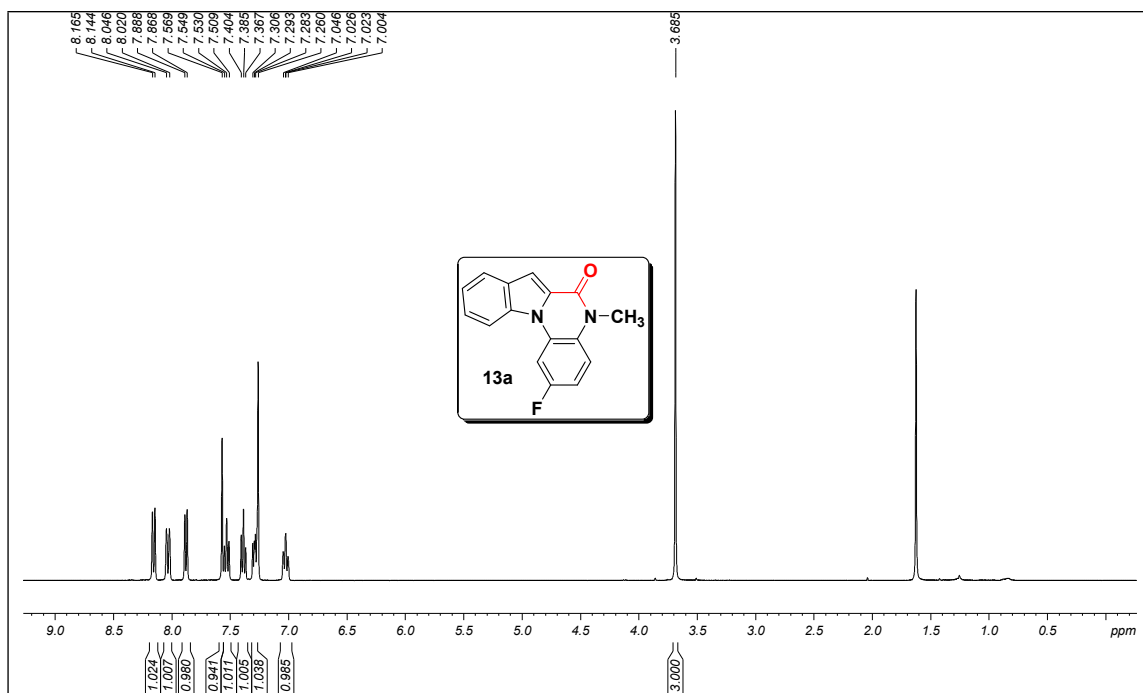

Figure S29. 400 MHz  $^1\text{H}$  NMR spectrum of **13a** in  $\text{CDCl}_3$

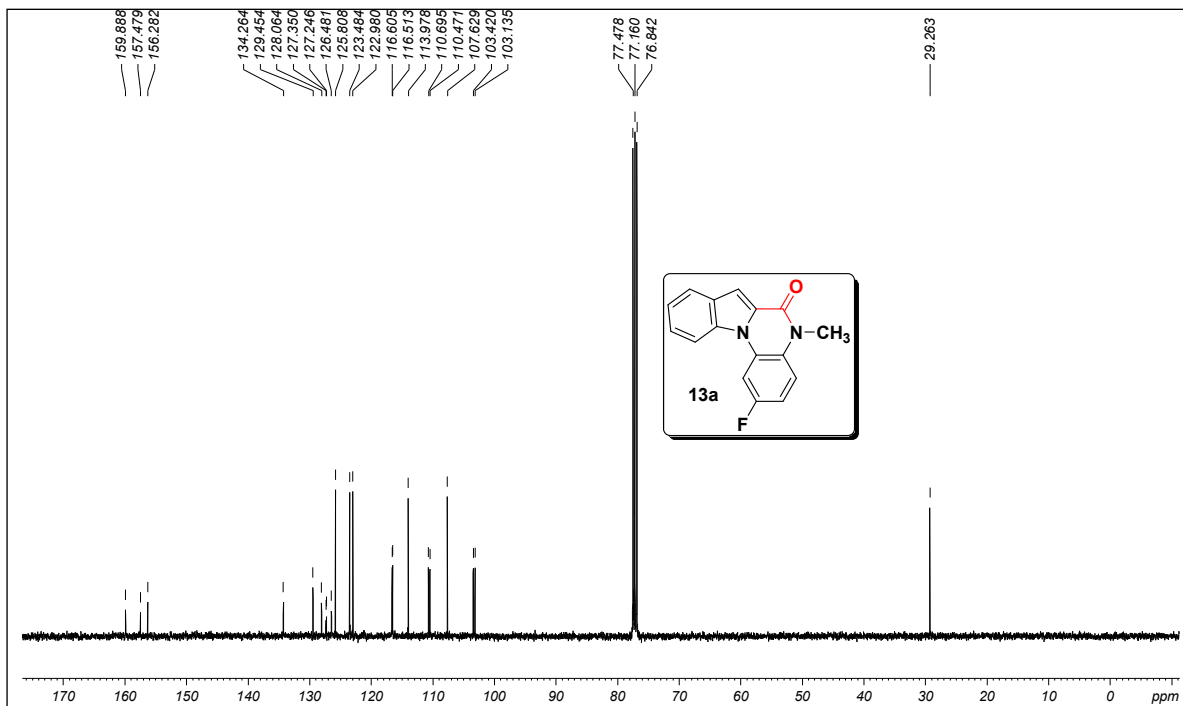

Figure S30. 100 MHz  $^{13}\text{C}$  NMR spectrum of **13a** in  $\text{CDCl}_3$

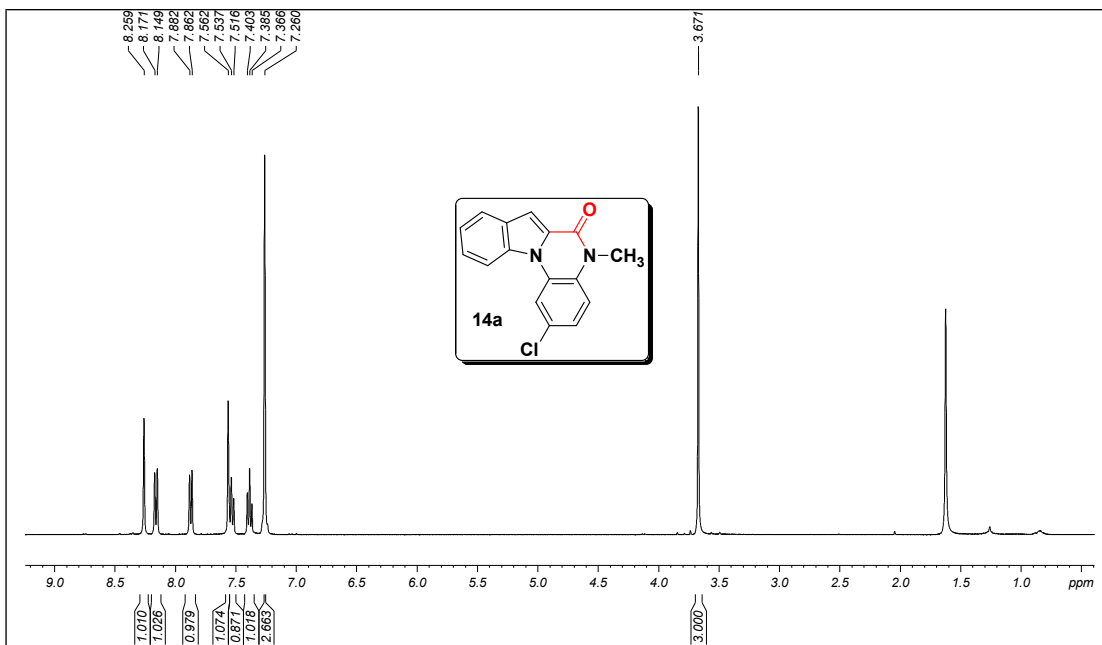

Figure S31. 400 MHz  $^1\text{H}$  NMR spectrum of **14a** in  $\text{CDCl}_3$

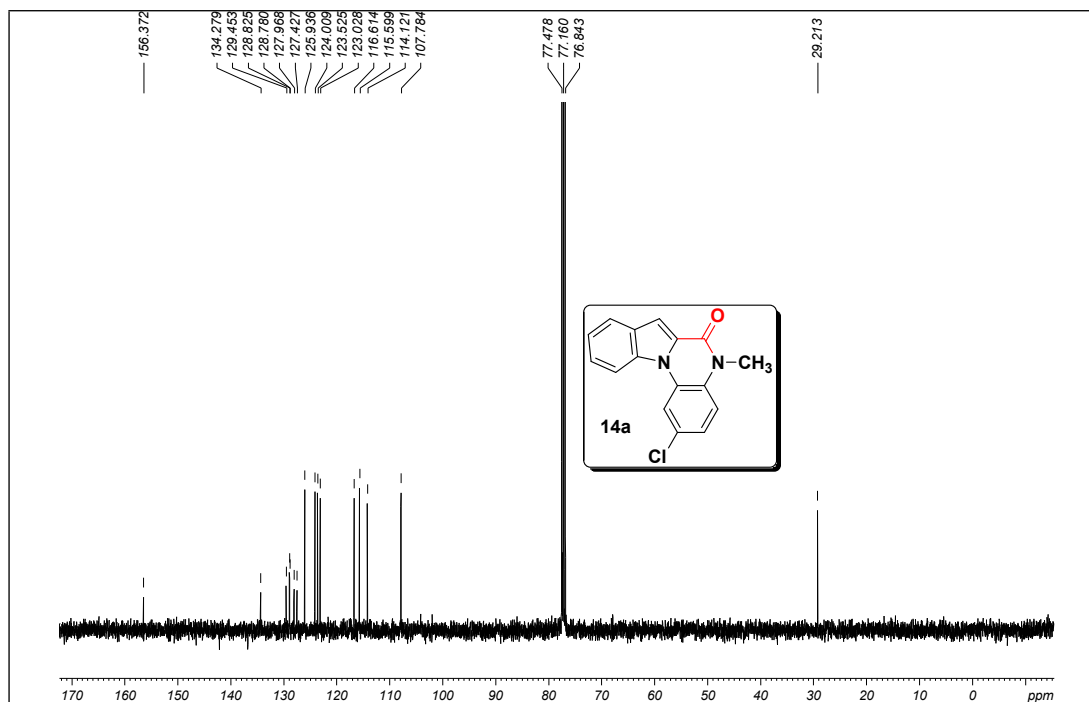

Figure S32. 100 MHz  $^{13}\text{C}$  NMR spectrum of **14a** in  $\text{CDCl}_3$

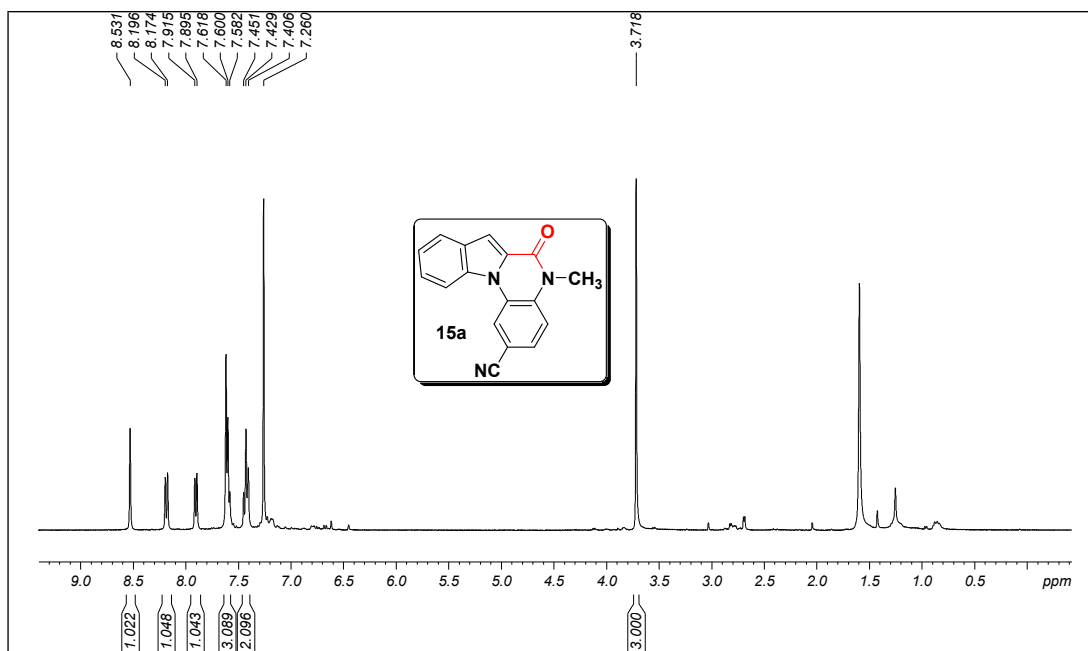

Figure S33. 400 MHz <sup>1</sup>H NMR spectrum of **15a** in CDCl<sub>3</sub>

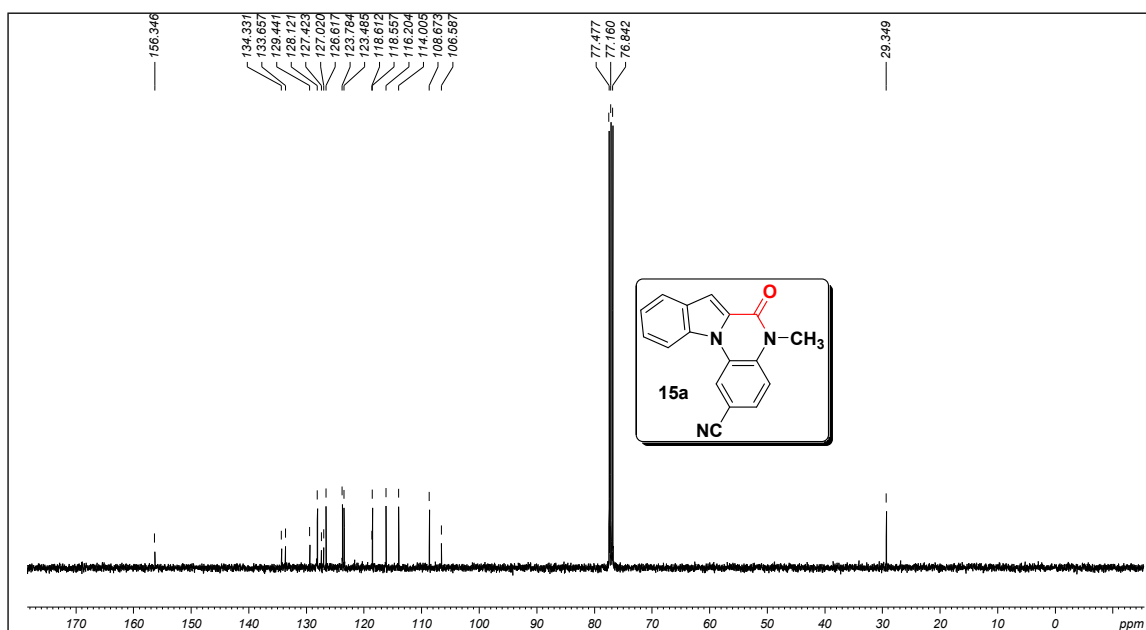

Figure S34. 100 MHz <sup>13</sup>C NMR spectrum of **15a** in CDCl<sub>3</sub>

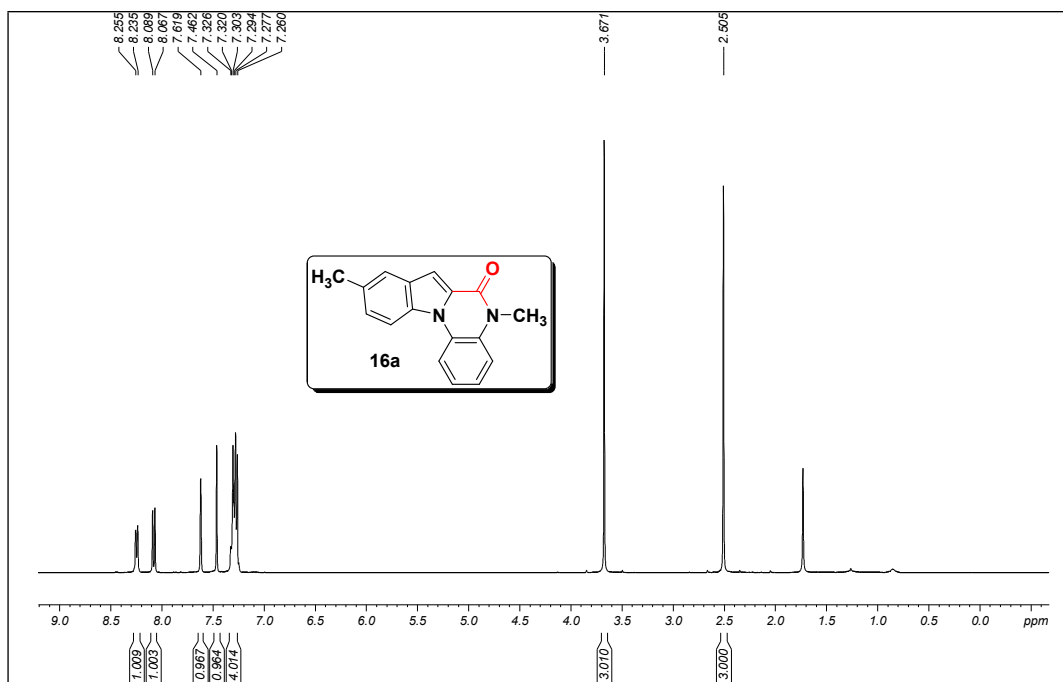

Figure S35. 400 MHz  $^1\text{H}$  NMR spectrum of **16a** in  $\text{CDCl}_3$

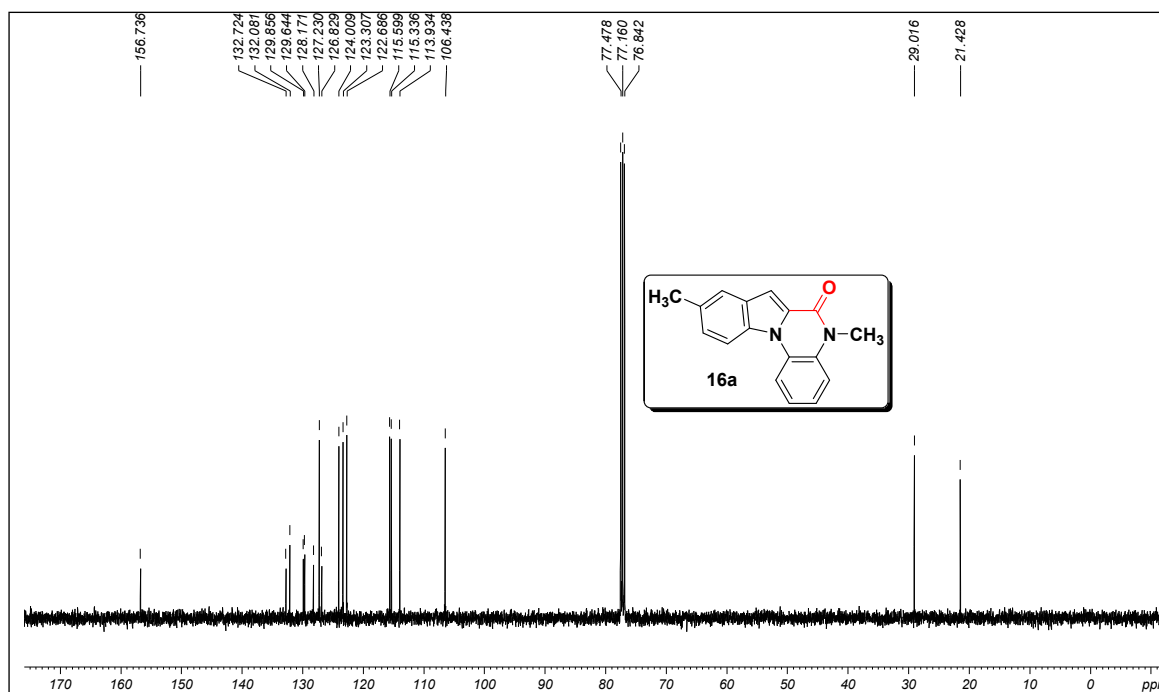

Figure S36. 100 MHz  $^{13}\text{C}$  NMR spectrum of **16a** in  $\text{CDCl}_3$

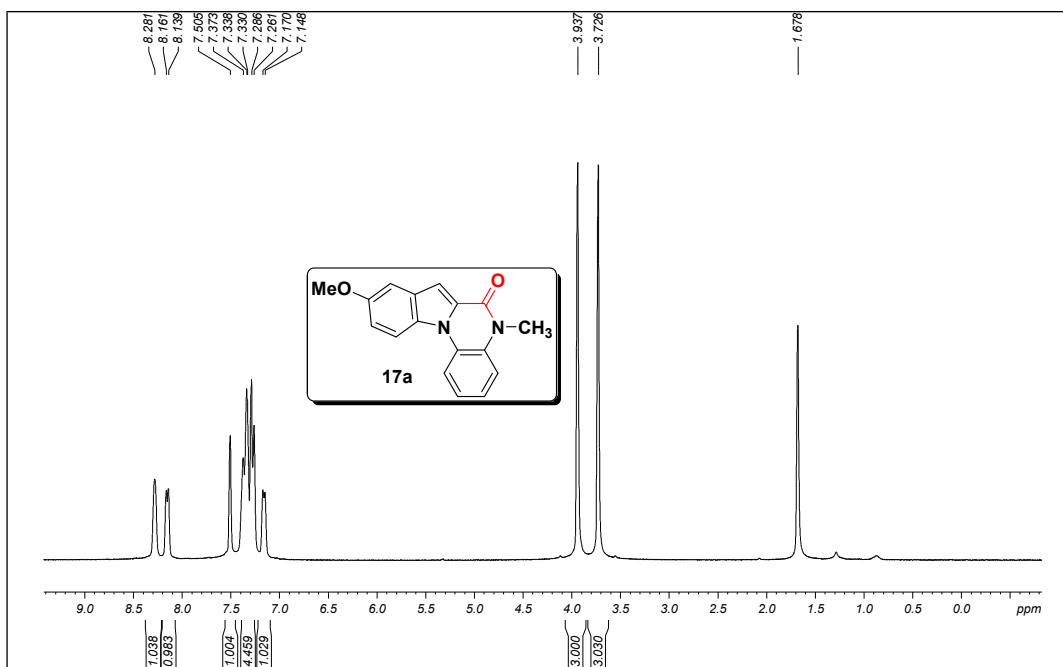

Figure S37. 400 MHz  $^1\text{H}$  NMR spectrum of **17a** in  $\text{CDCl}_3$

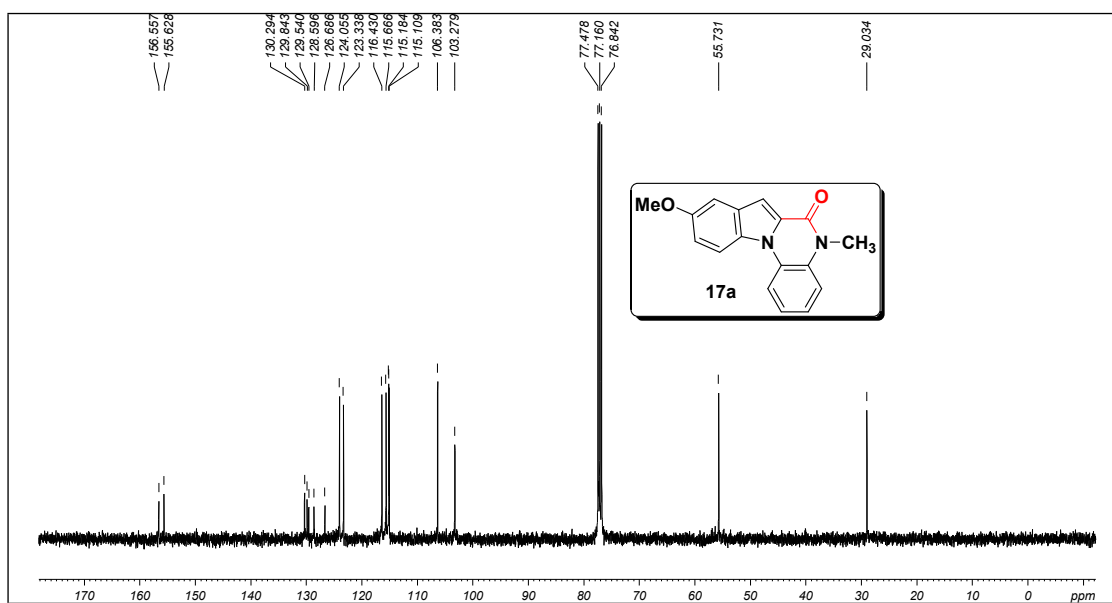

Figure S38. 100 MHz  $^{13}\text{C}$  NMR spectrum of **17a** in  $\text{CDCl}_3$

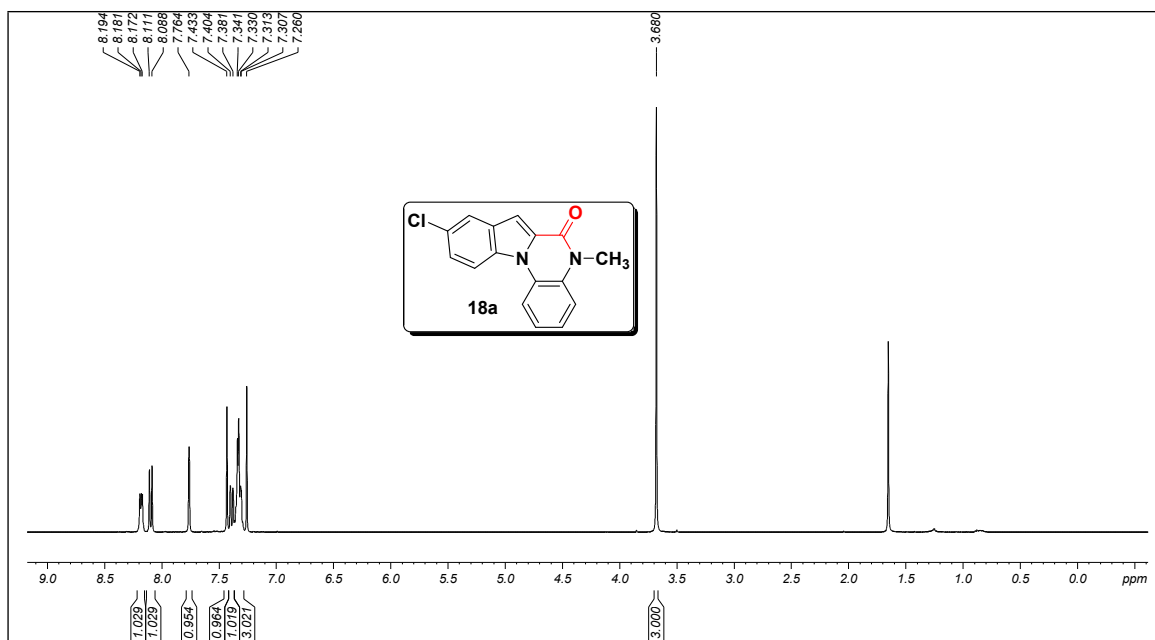

Figure S39. 400 MHz  $^1\text{H}$  NMR spectrum of **18a** in  $\text{CDCl}_3$

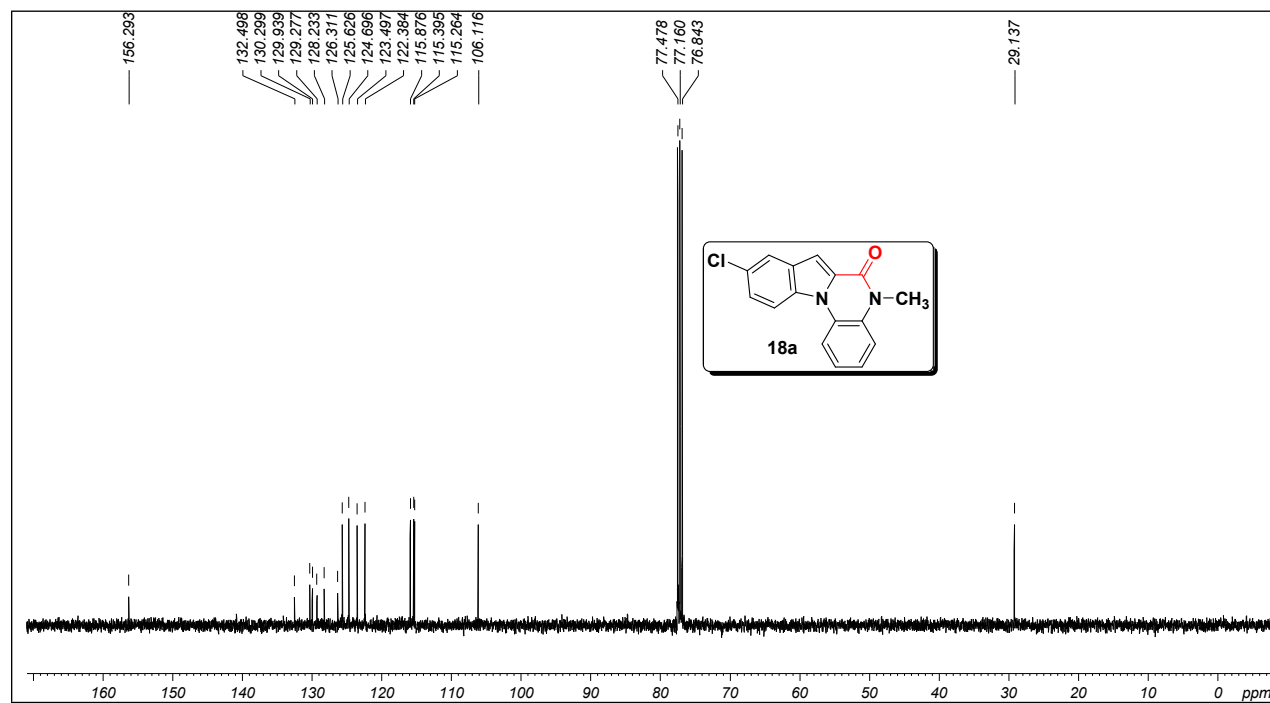

Figure S40. 100 MHz  $^{13}\text{C}$  NMR spectrum of **18a** in  $\text{CDCl}_3$



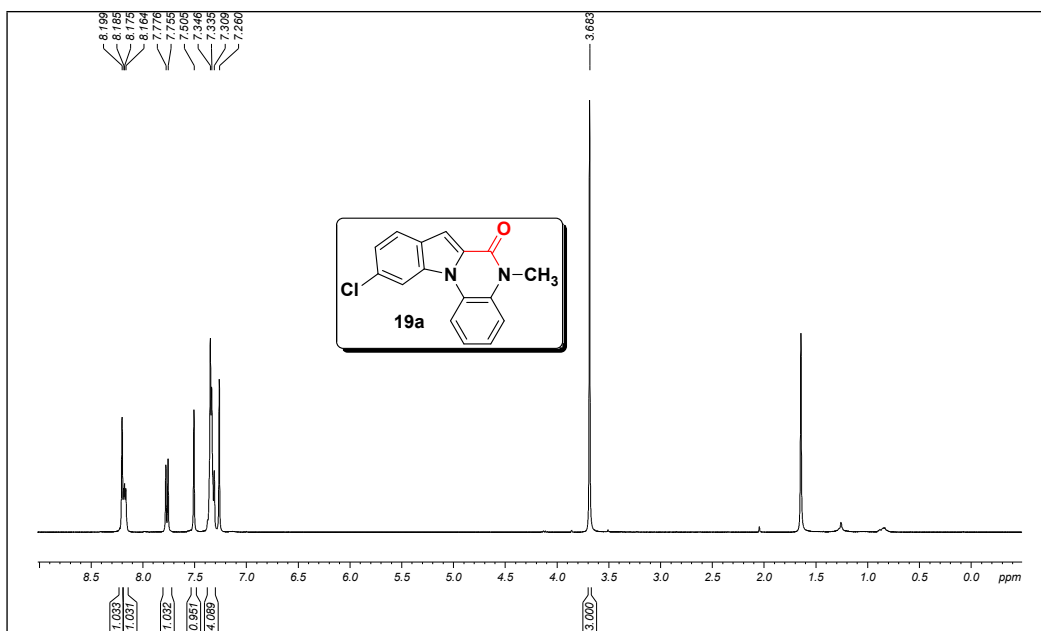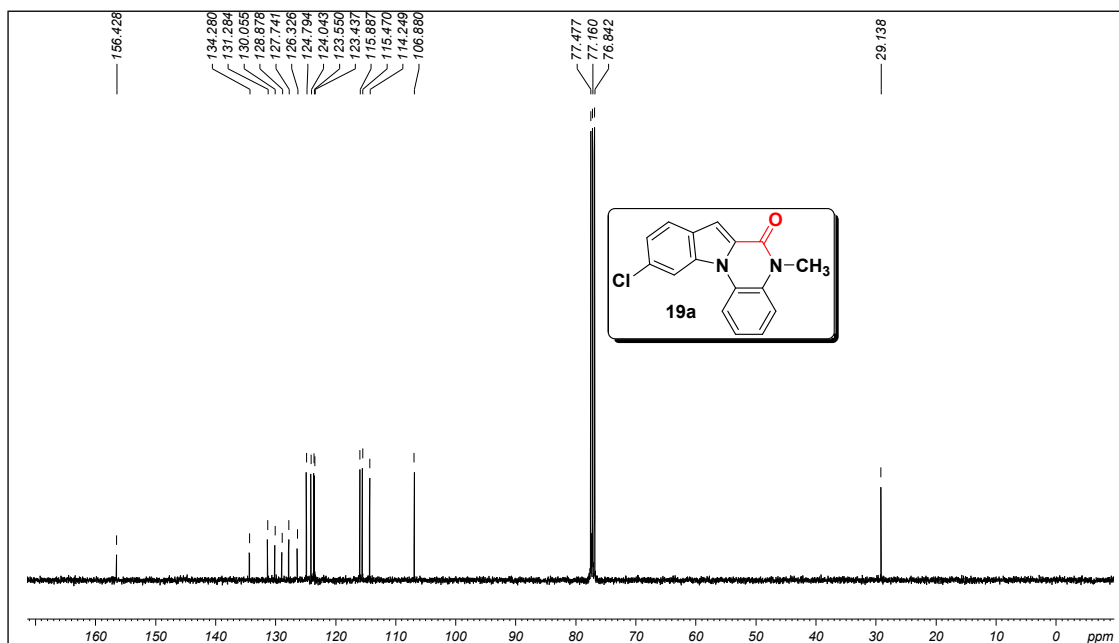

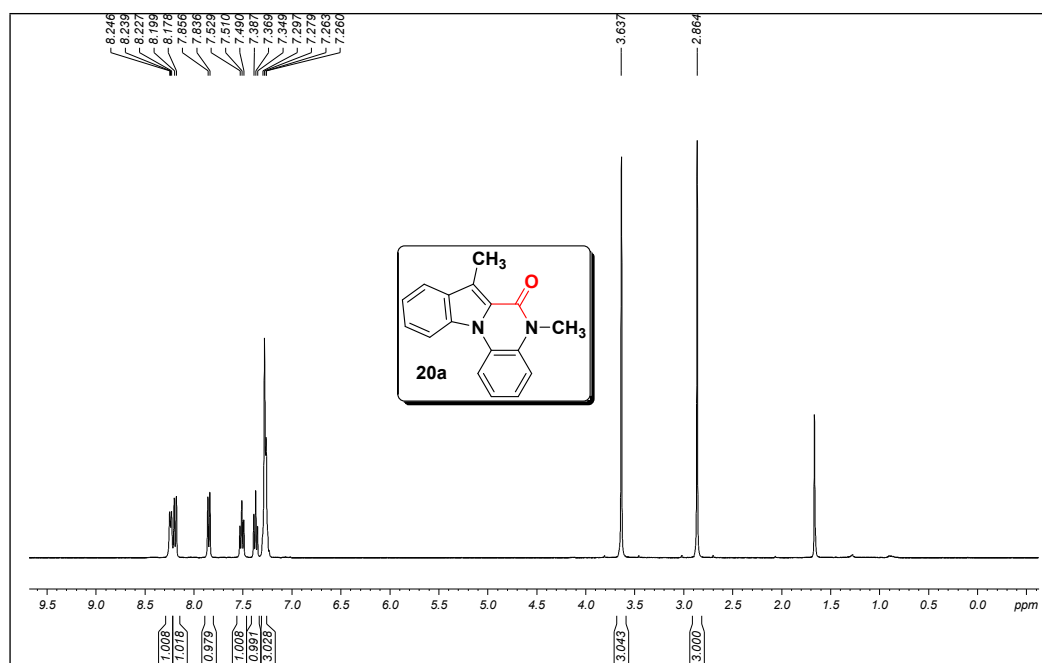

Figure S43. 400 MHz  $^1\text{H}$  NMR spectrum of **20a** in  $\text{CDCl}_3$

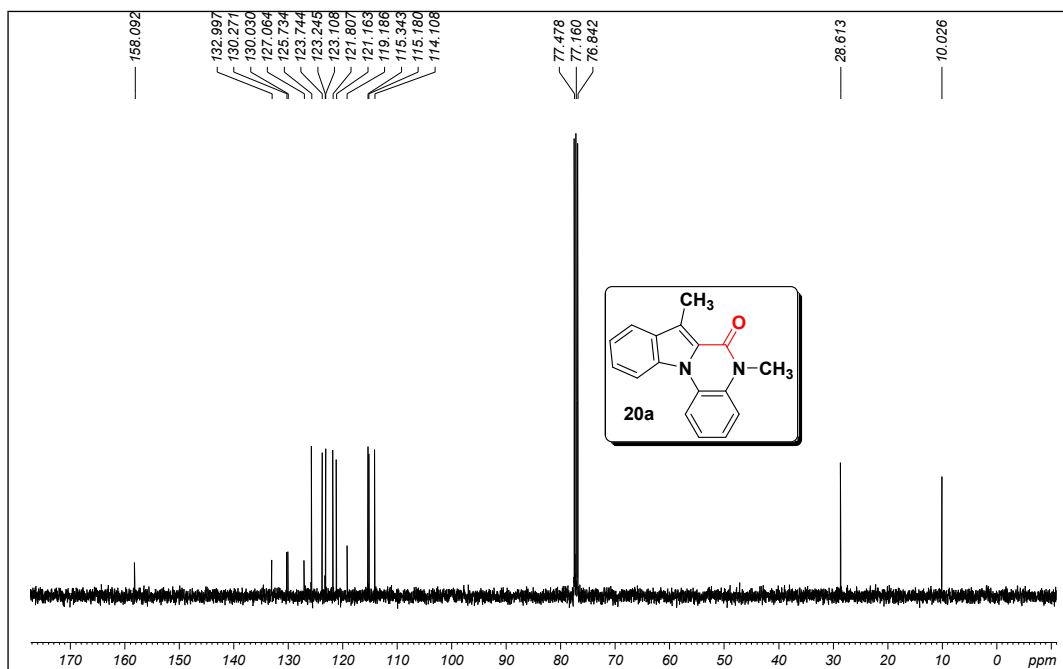

Figure S44. 100 MHz  $^{13}\text{C}$  NMR spectrum of **20a** in  $\text{CDCl}_3$

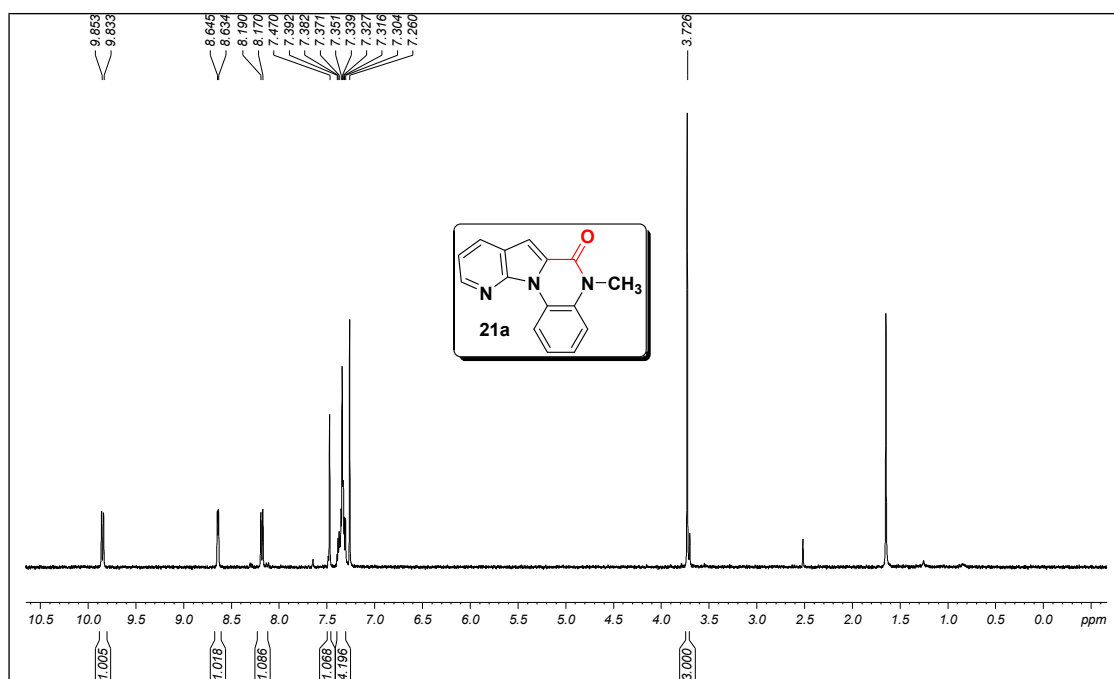

Figure S45. 400 MHz  $^1\text{H}$  NMR spectrum of **21a** in  $\text{CDCl}_3$

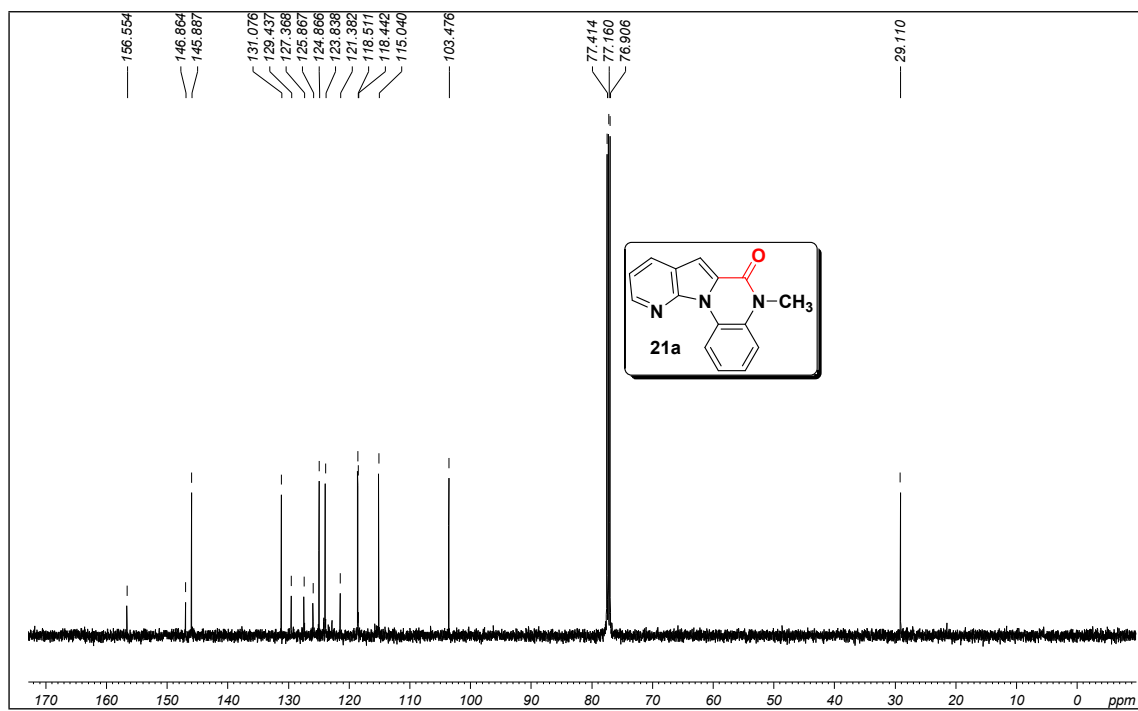

Figure S46. 125 MHz  $^{13}\text{C}$  NMR spectrum of **21a** in  $\text{CDCl}_3$

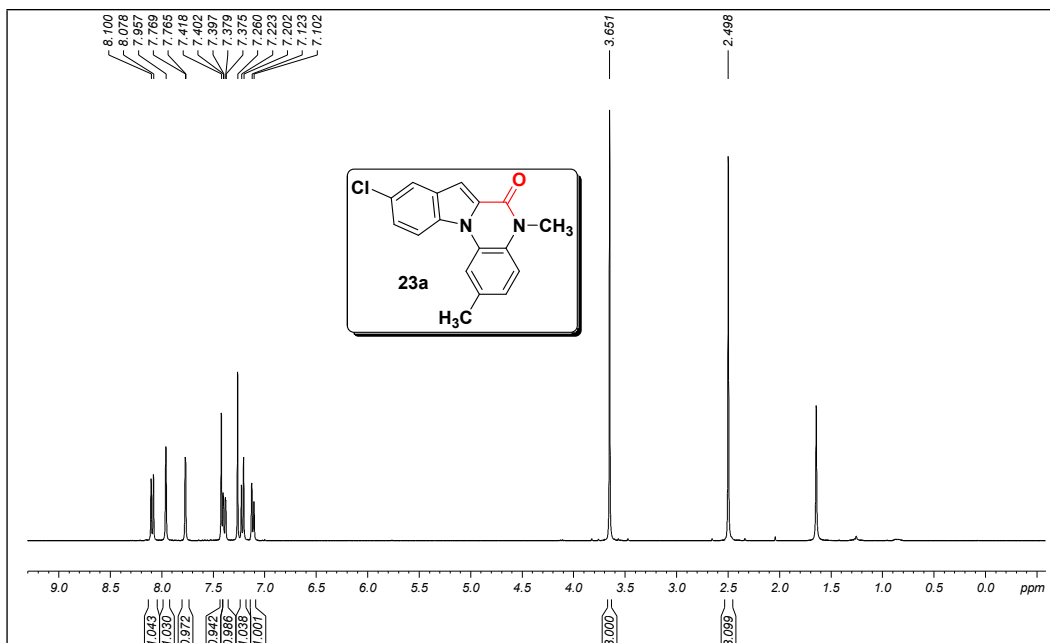

Figure S47. 400 MHz <sup>1</sup>H NMR spectrum of **23a** in CDCl<sub>3</sub>

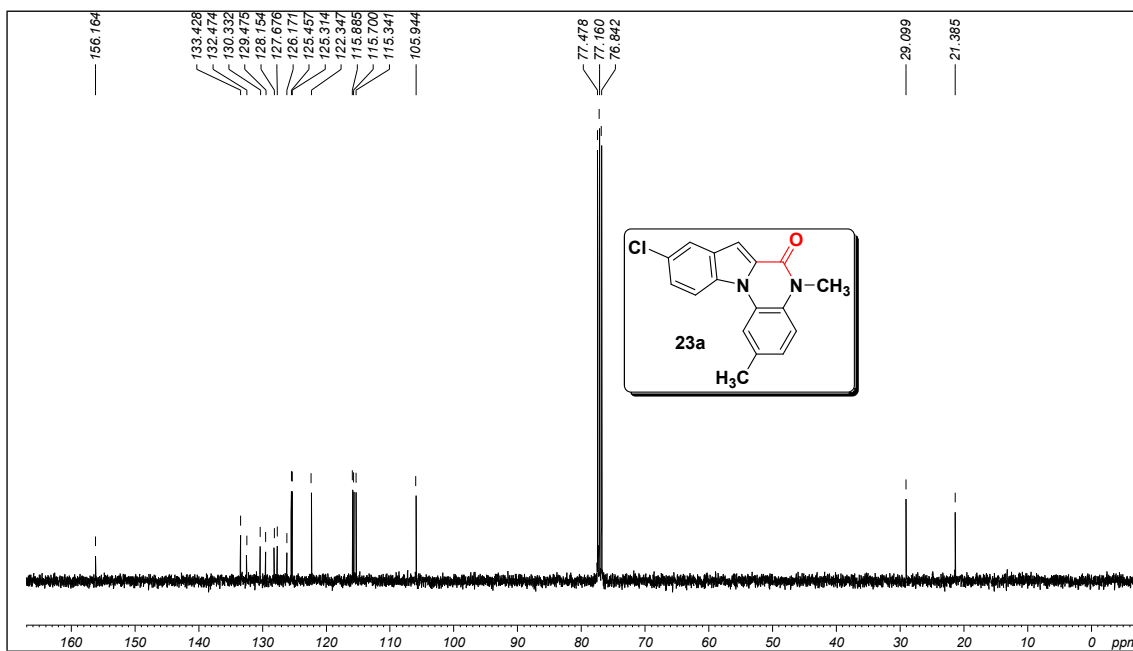

Figure S48. 100 MHz <sup>13</sup>C NMR spectrum of **23a** in CDCl<sub>3</sub>

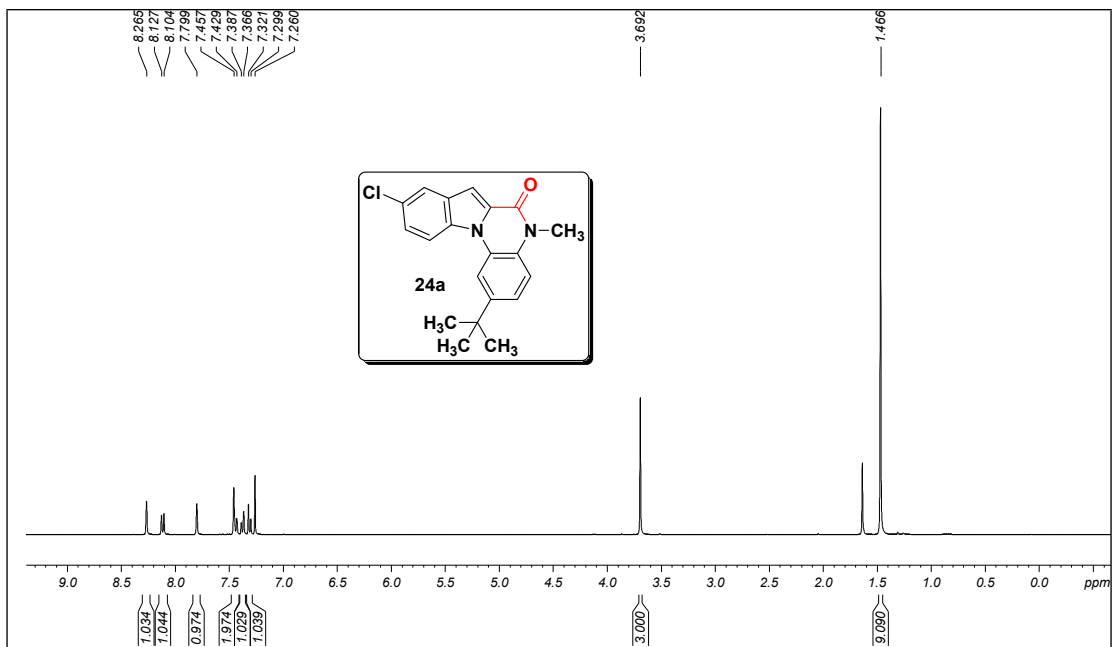

Figure S49. 400 MHz <sup>1</sup>H NMR spectrum of **24a** in CDCl<sub>3</sub>

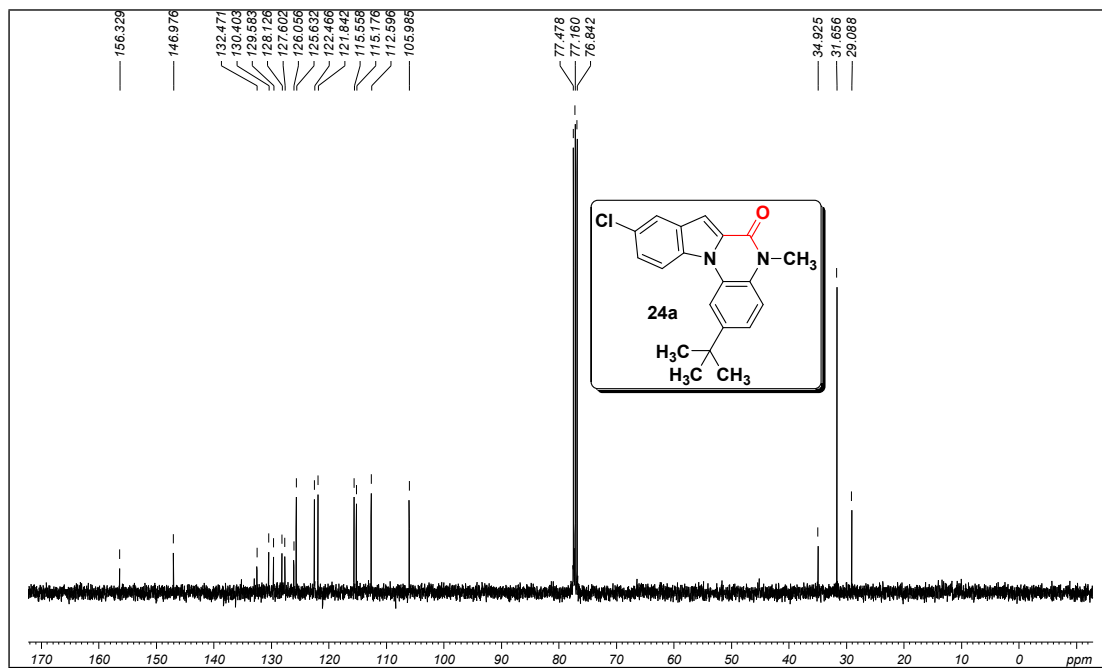

Figure S50. 100 MHz <sup>13</sup>C NMR spectrum of **24a** in CDCl<sub>3</sub>

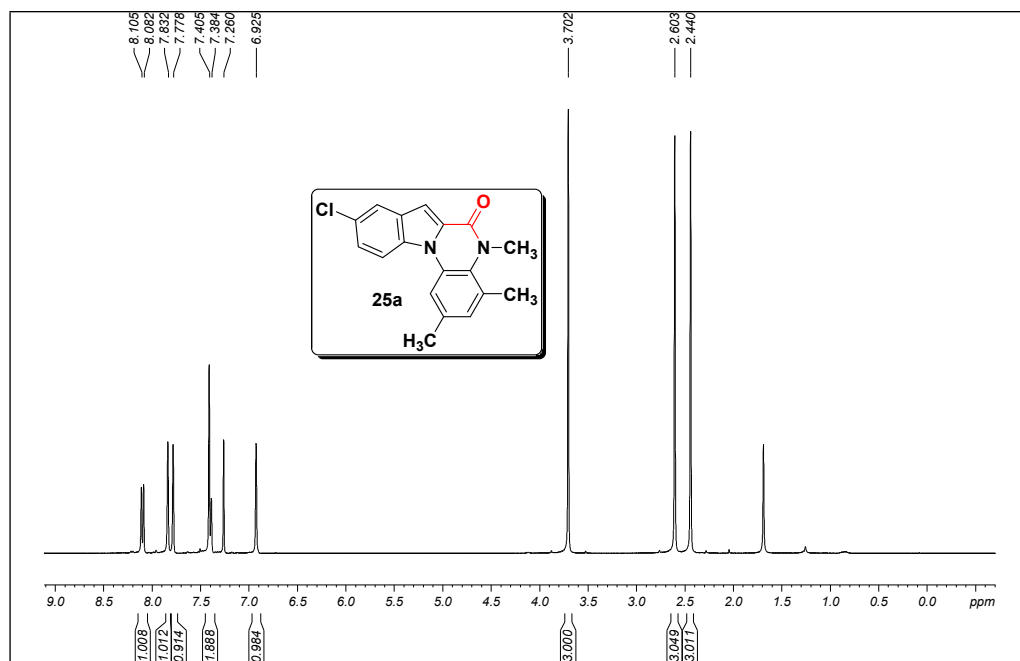

Figure S51. 400 MHz <sup>1</sup>H NMR spectrum of **25a** in CDCl<sub>3</sub>

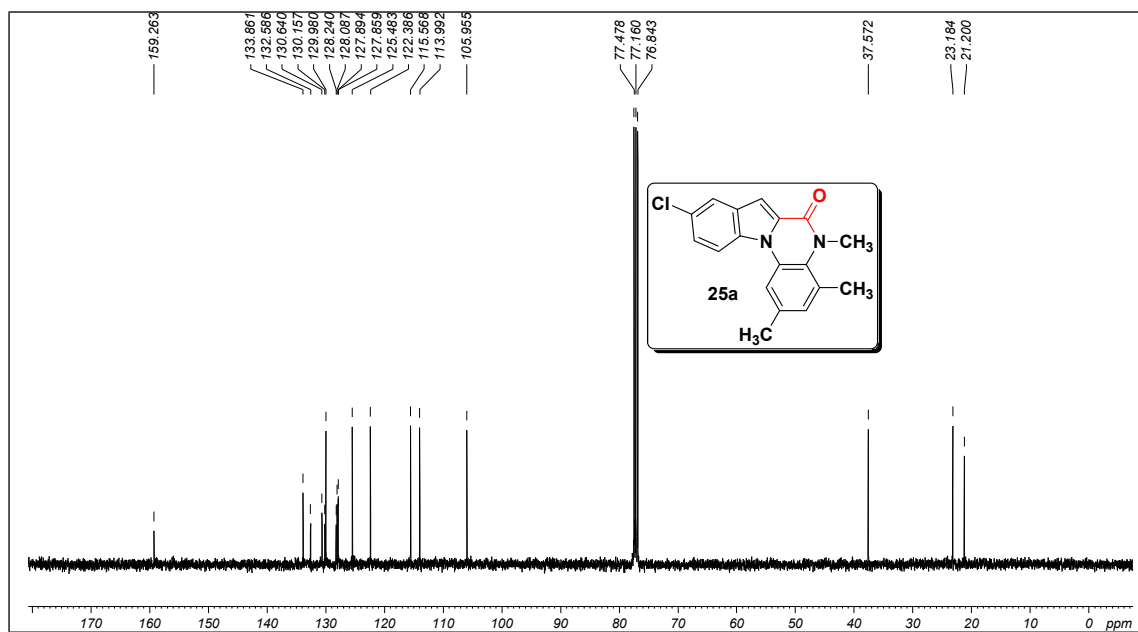

Figure S52. 100 MHz <sup>13</sup>C NMR spectrum of **25a** in CDCl<sub>3</sub>

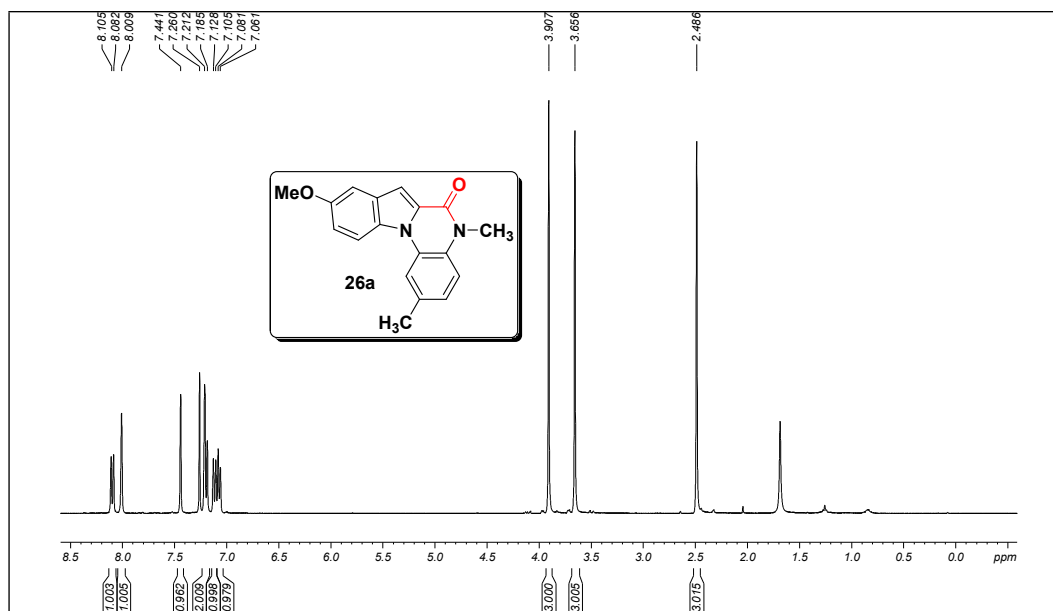

Figure S53. 400 MHz <sup>1</sup>H NMR spectrum of **26a** in CDCl<sub>3</sub>

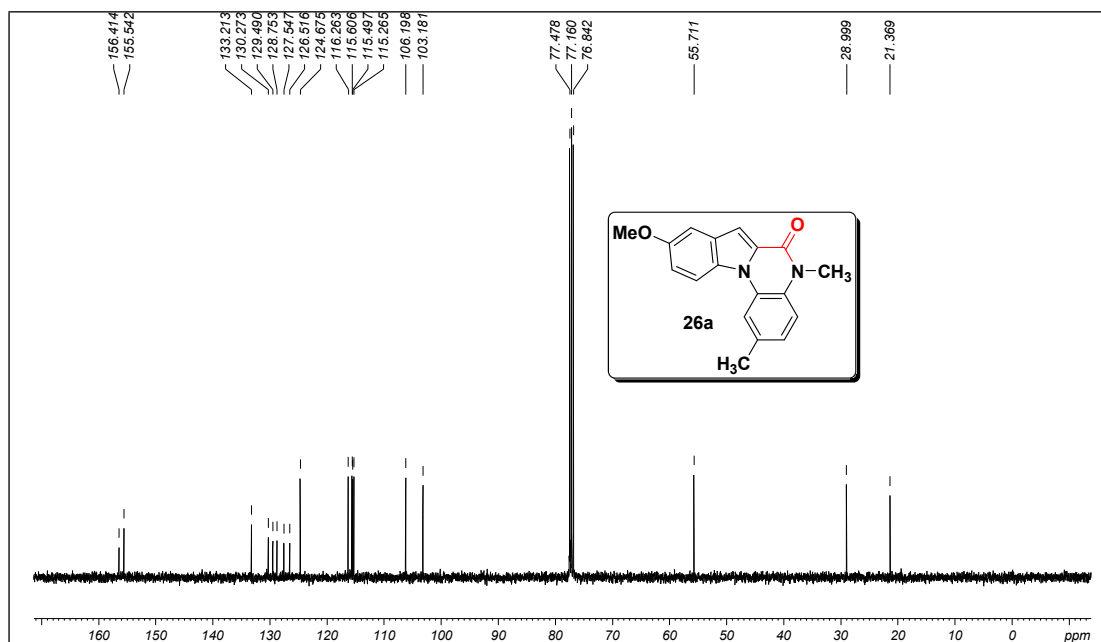

Figure S54. 100 MHz <sup>13</sup>C NMR spectrum of **26a** in CDCl<sub>3</sub>

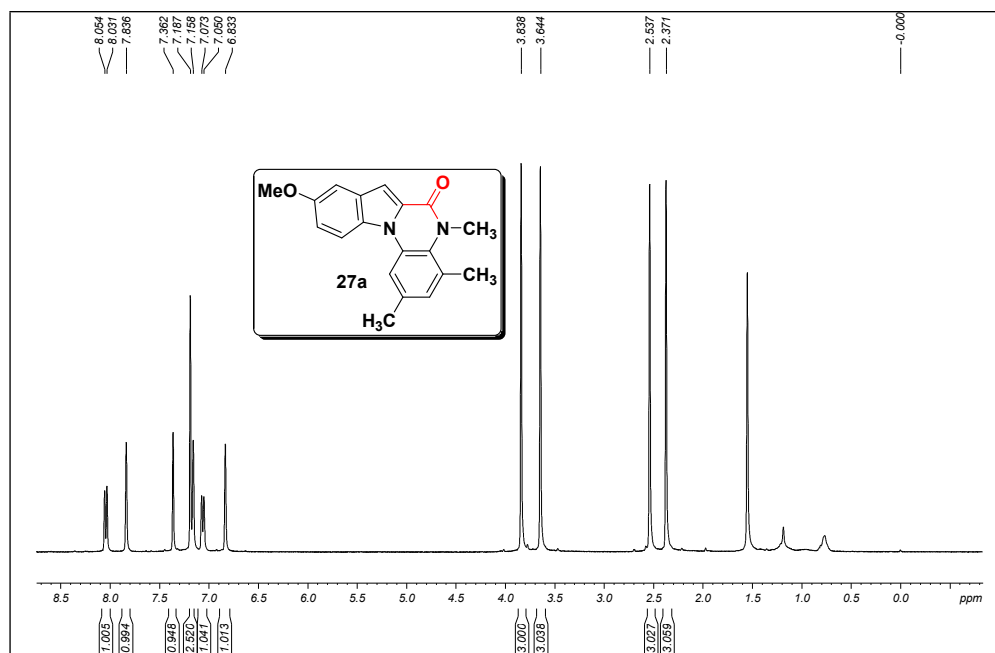

Figure S55. 400 MHz  $^1\text{H}$  NMR spectrum of **27a** in  $\text{CDCl}_3$

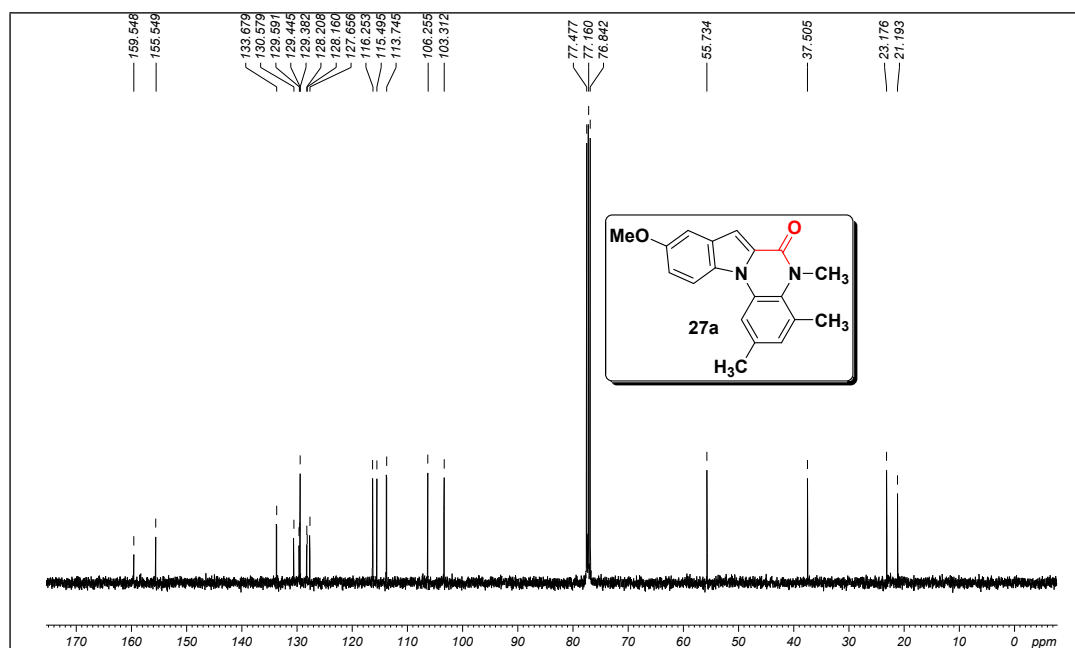

Figure S56. 100 MHz  $^{13}\text{C}$  NMR spectrum of **27a** in  $\text{CDCl}_3$



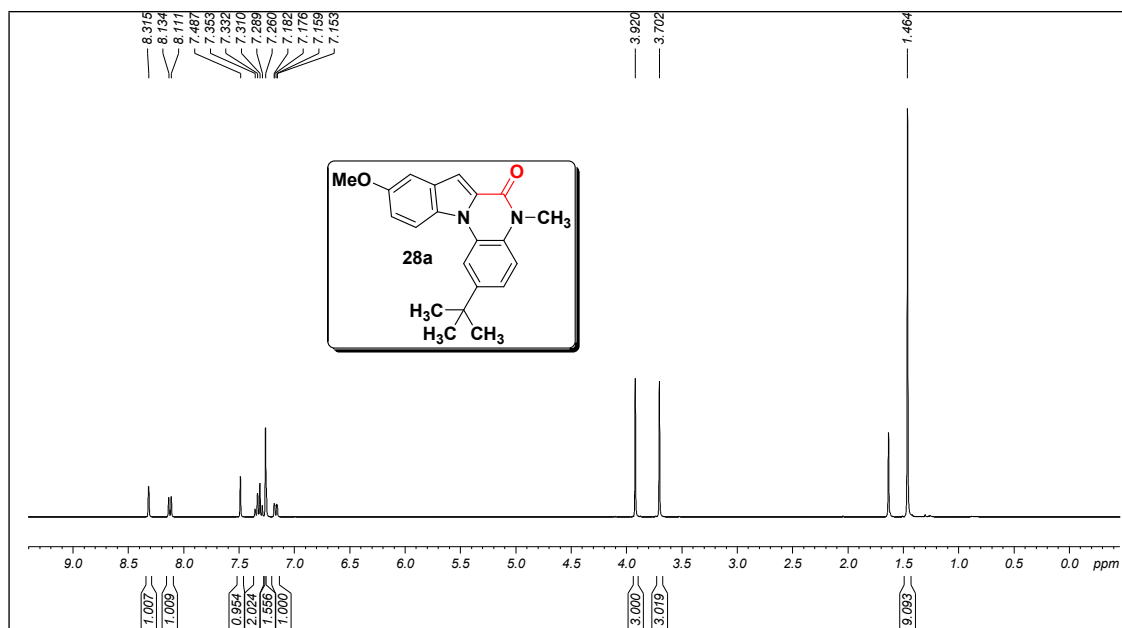

Figure S57. 400 MHz  $^1\text{H}$  NMR spectrum of **28a** in  $\text{CDCl}_3$

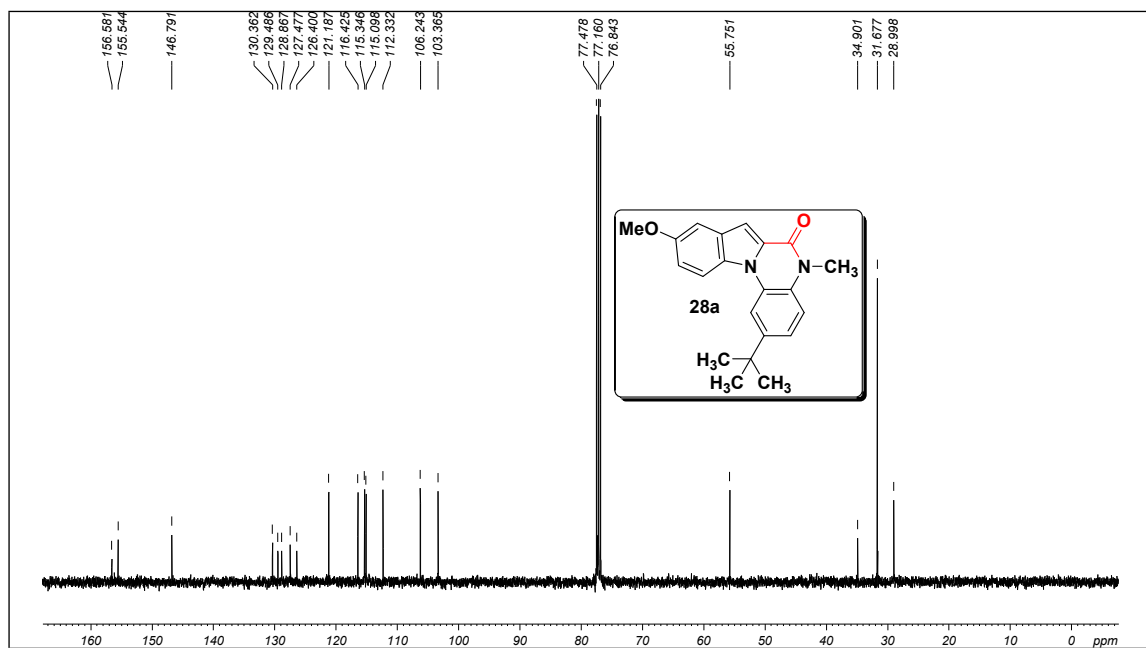

Figure S58. 100 MHz  $^{13}\text{C}$  NMR spectrum of **28a** in  $\text{CDCl}_3$

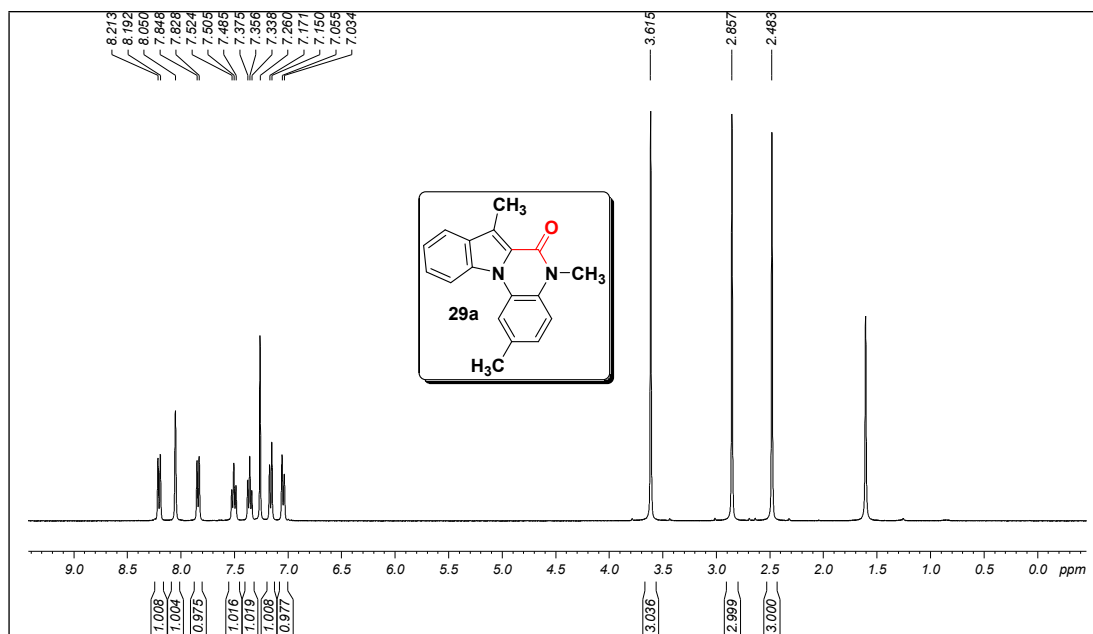

Figure S59. 400 MHz <sup>1</sup>H NMR spectrum of **29a** in CDCl<sub>3</sub>

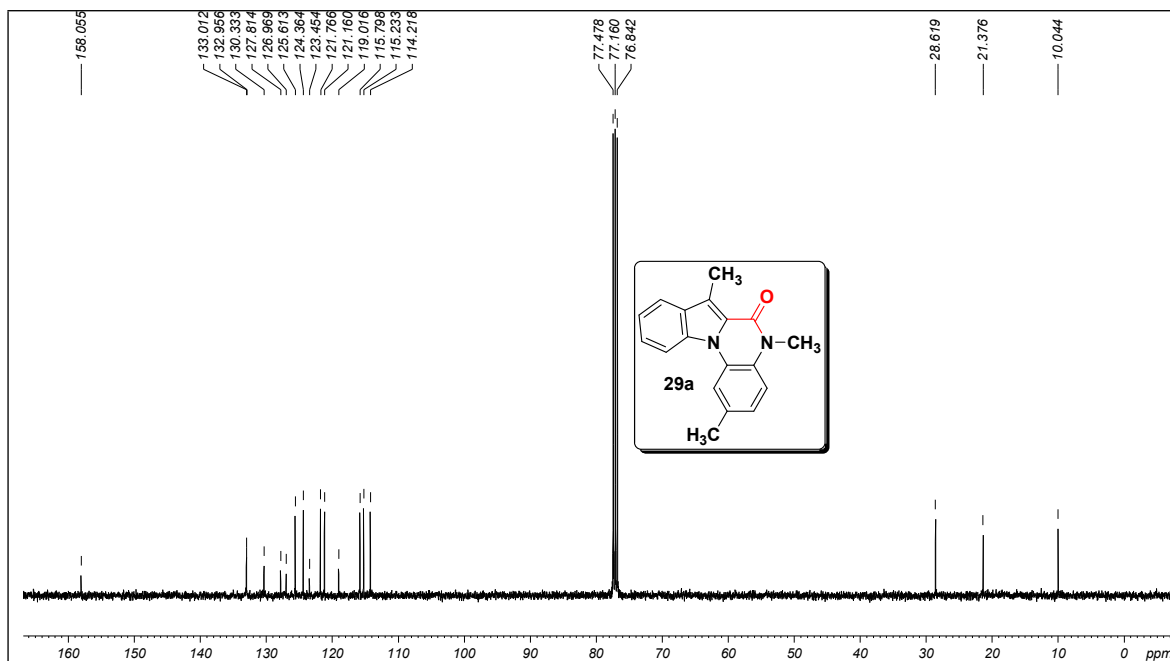

Figure S60. 100 MHz <sup>13</sup>C NMR spectrum of **29a** in CDCl<sub>3</sub>

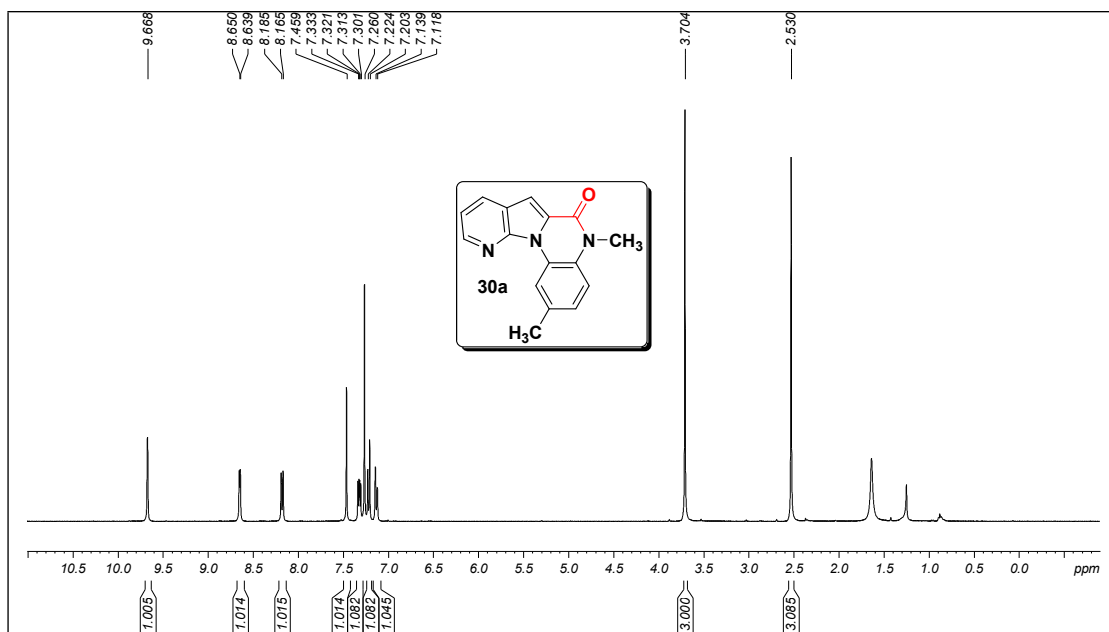

Figure S61. 400 MHz  $^1\text{H}$  NMR spectrum of **30a** in  $\text{CDCl}_3$

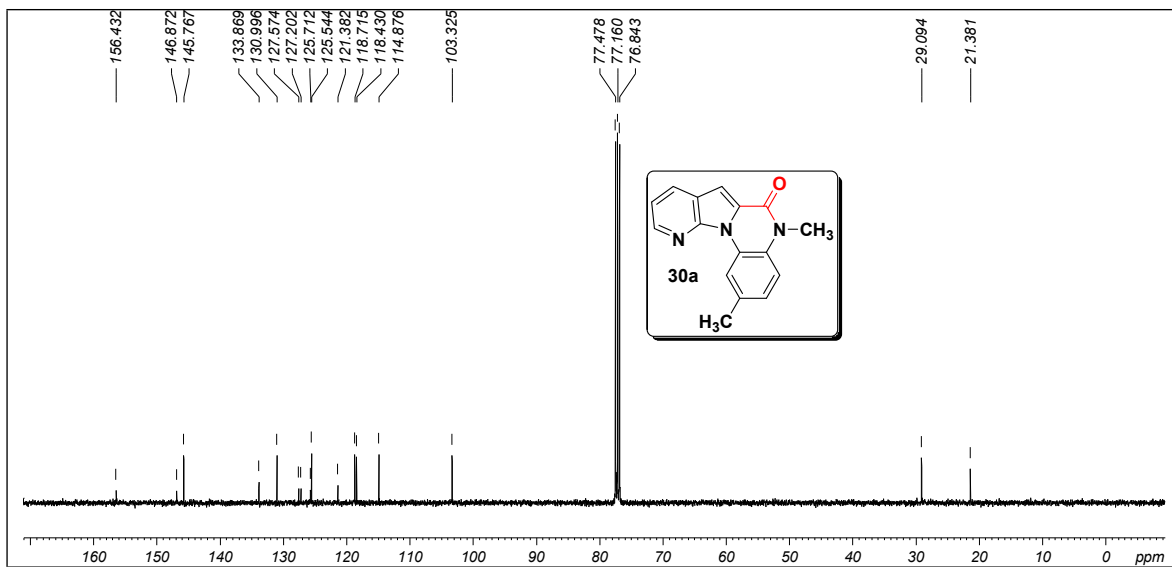

Figure S62. 100 MHz  $^{13}\text{C}$  NMR spectrum of **30a** in  $\text{CDCl}_3$

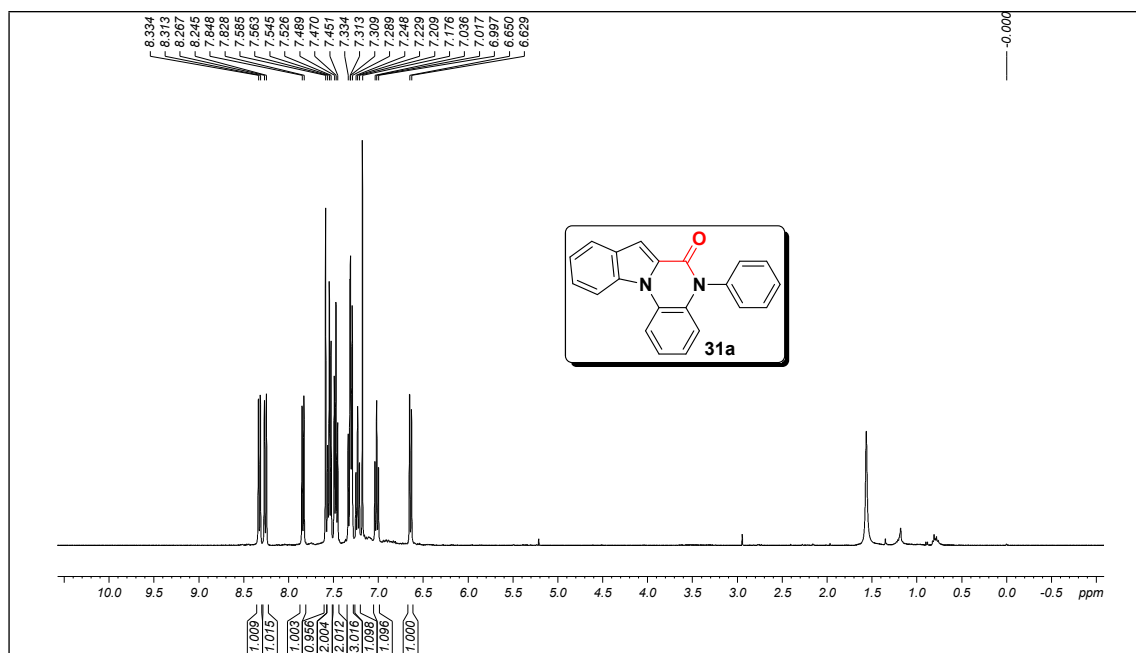

Figure S63. 400 MHz  $^1\text{H}$  NMR spectrum of **31a** in  $\text{CDCl}_3$

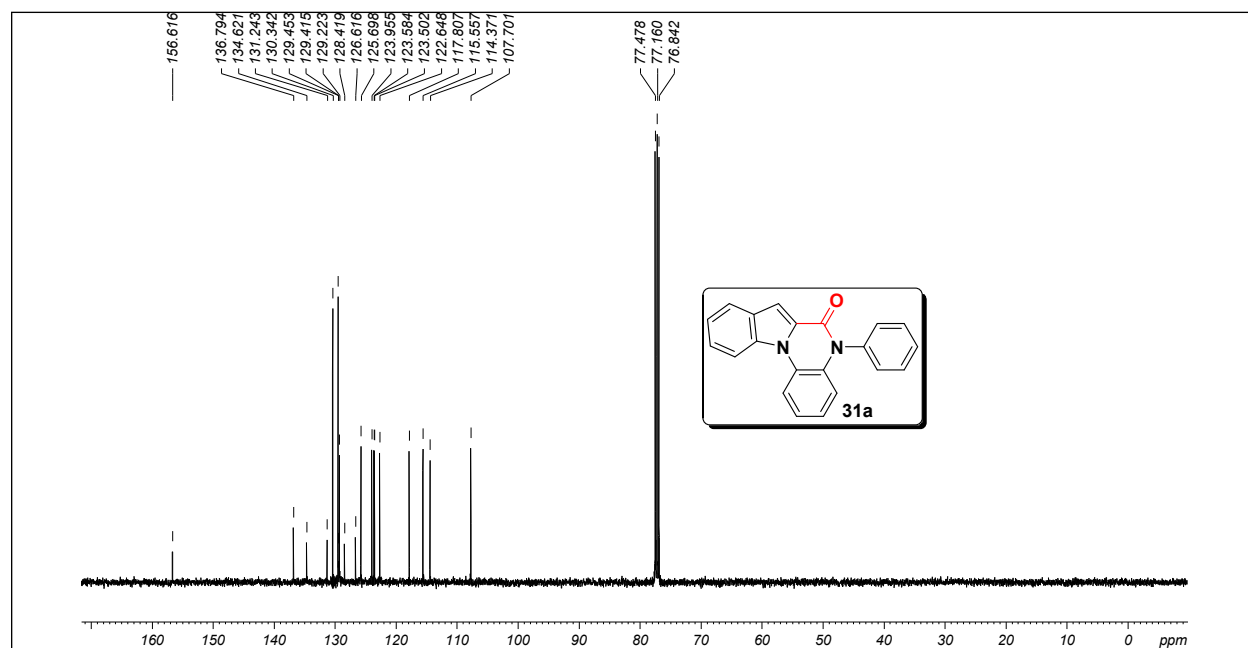

Figure S64. 100 MHz  $^{13}\text{C}$  NMR spectrum of **31a** in  $\text{CDCl}_3$

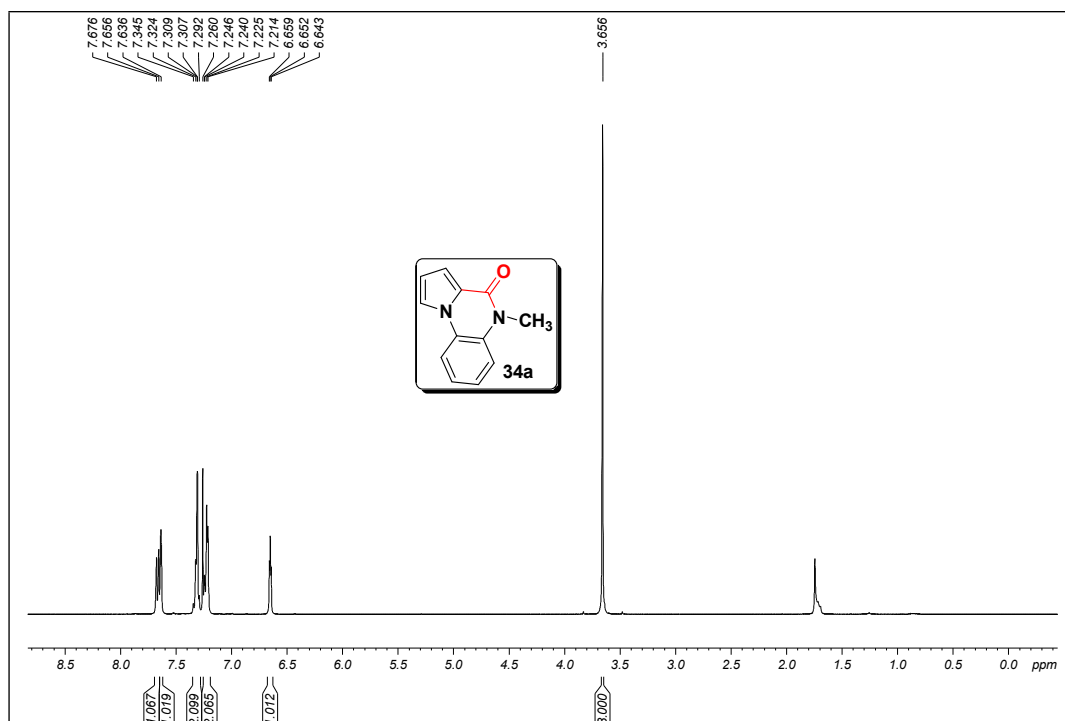

Figure S65. 400 MHz <sup>1</sup>H NMR spectrum of **34a** in CDCl<sub>3</sub>

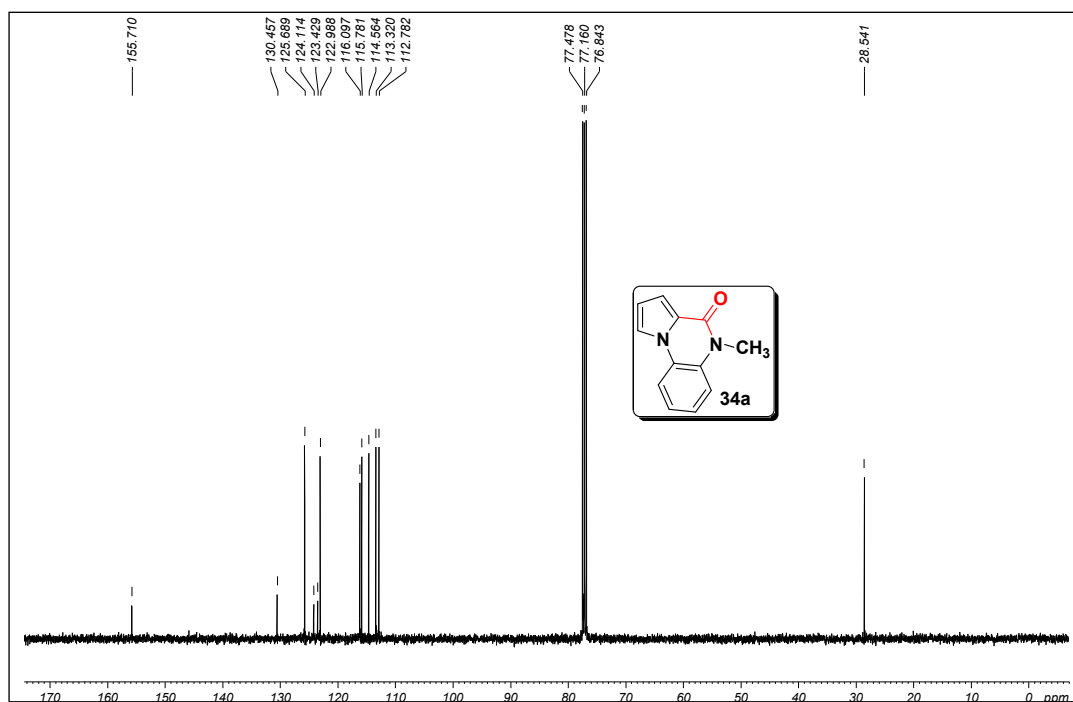

Figure S66. 100 MHz <sup>13</sup>C NMR spectrum of **34a** in CDCl<sub>3</sub>

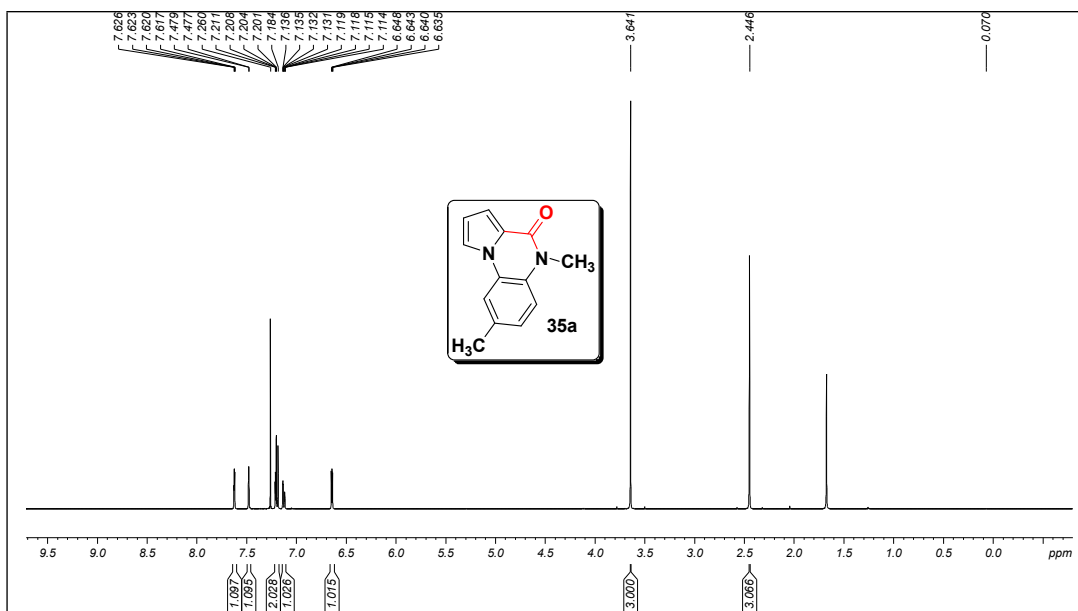

Figure S67. 500 MHz  $^1\text{H}$  NMR spectrum of **35a** in  $\text{CDCl}_3$

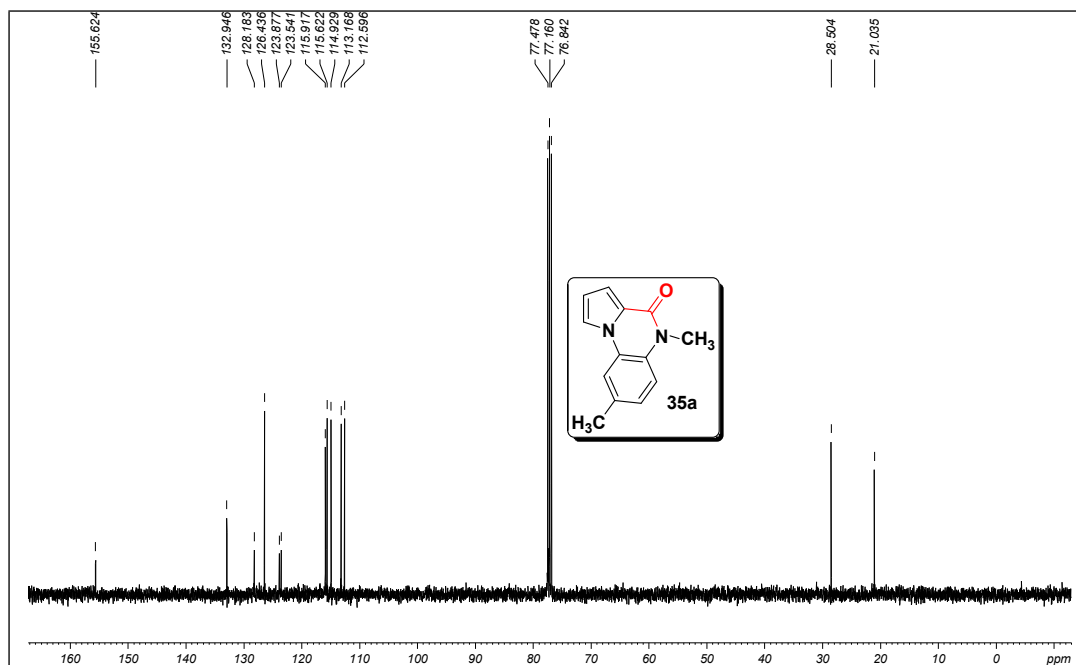

Figure S68. 100 MHz  $^{13}\text{C}$  NMR spectrum of **35a** in  $\text{CDCl}_3$

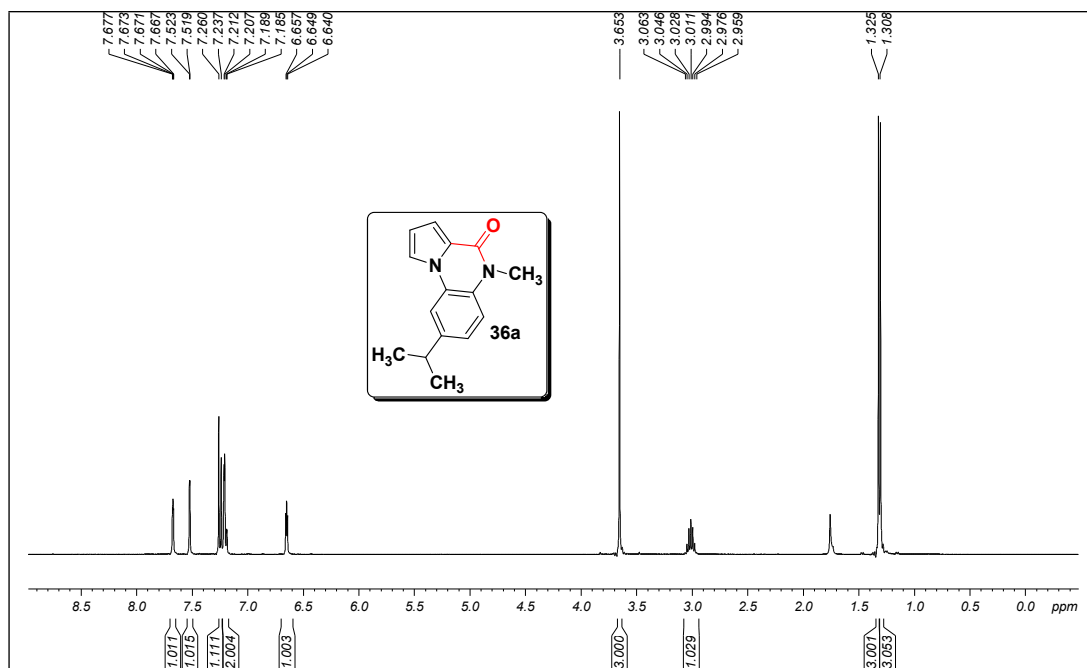

Figure S69. 400 MHz  $^1\text{H}$  NMR spectrum of **36a** in  $\text{CDCl}_3$

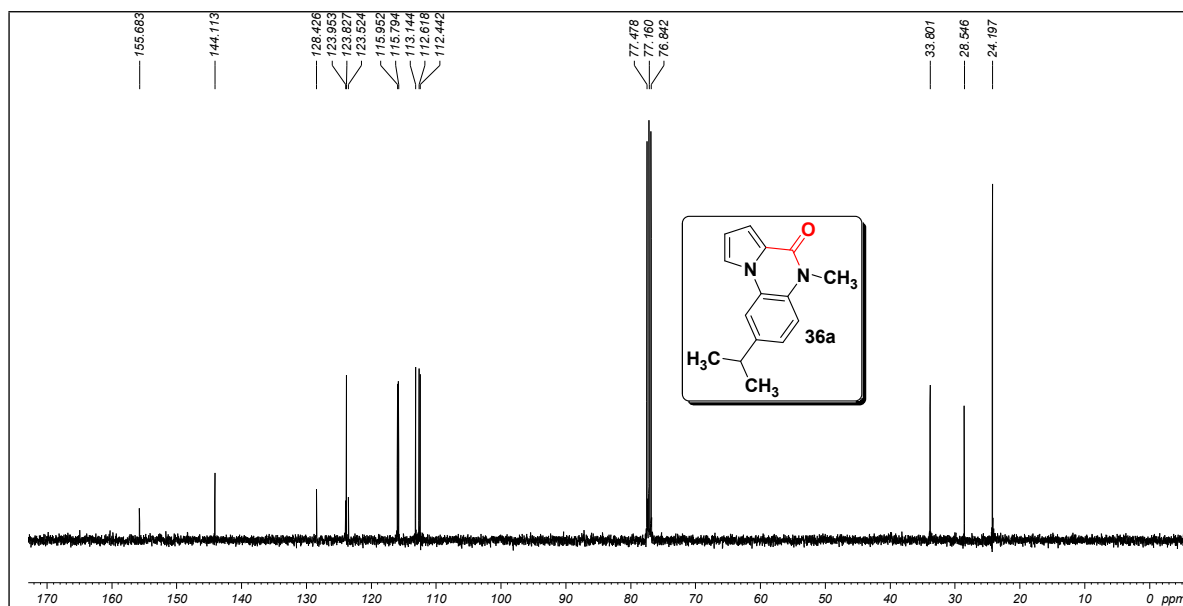

Figure S70. 100 MHz  $^{13}\text{C}$  NMR spectrum of **36a** in  $\text{CDCl}_3$

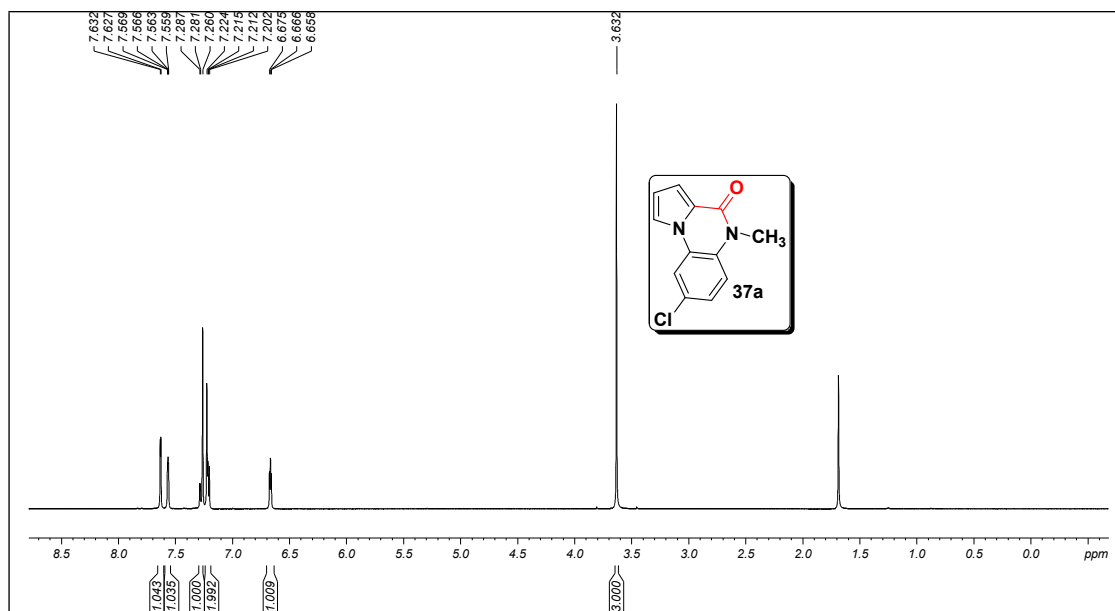

Figure S71. 400 MHz  $^1\text{H}$  NMR spectrum of **37a** in  $\text{CDCl}_3$

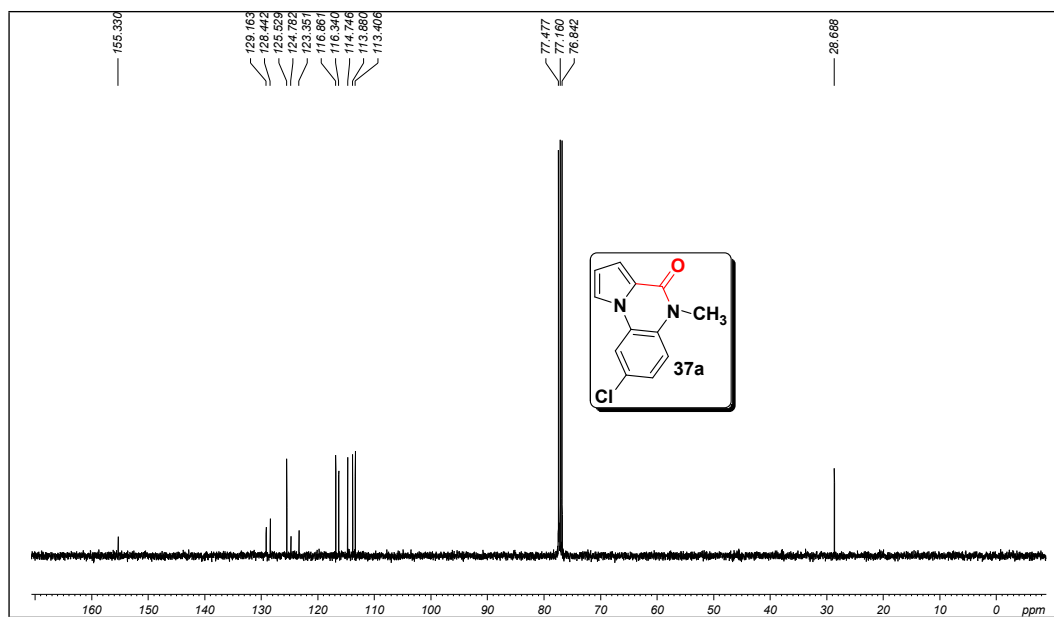

Figure S72. 100 MHz  $^{13}\text{C}$  NMR spectrum of **37a** in  $\text{CDCl}_3$



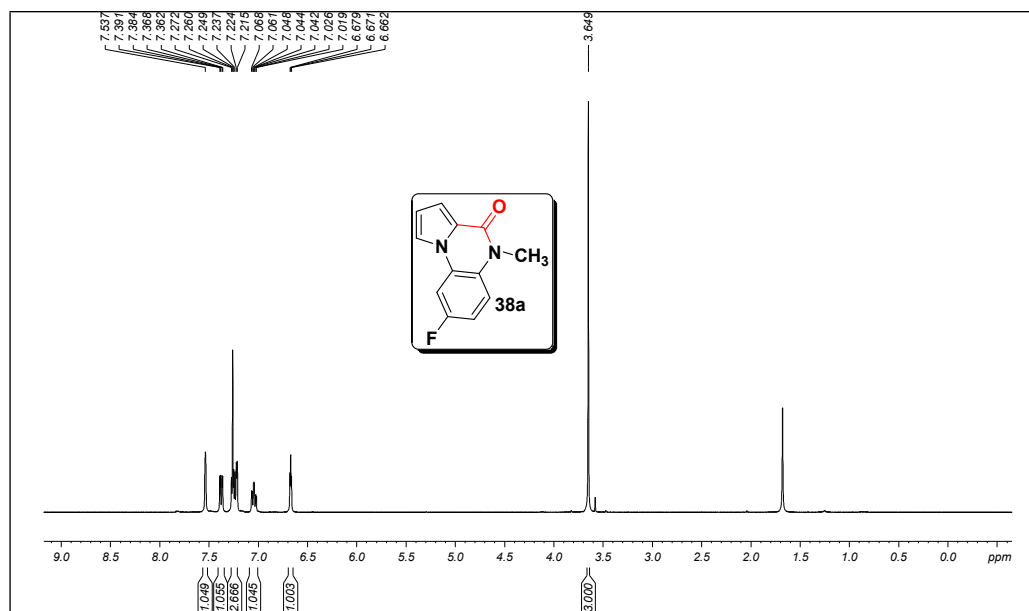

Figure S73. 400 MHz  $^1\text{H}$  NMR spectrum of **38a** in  $\text{CDCl}_3$

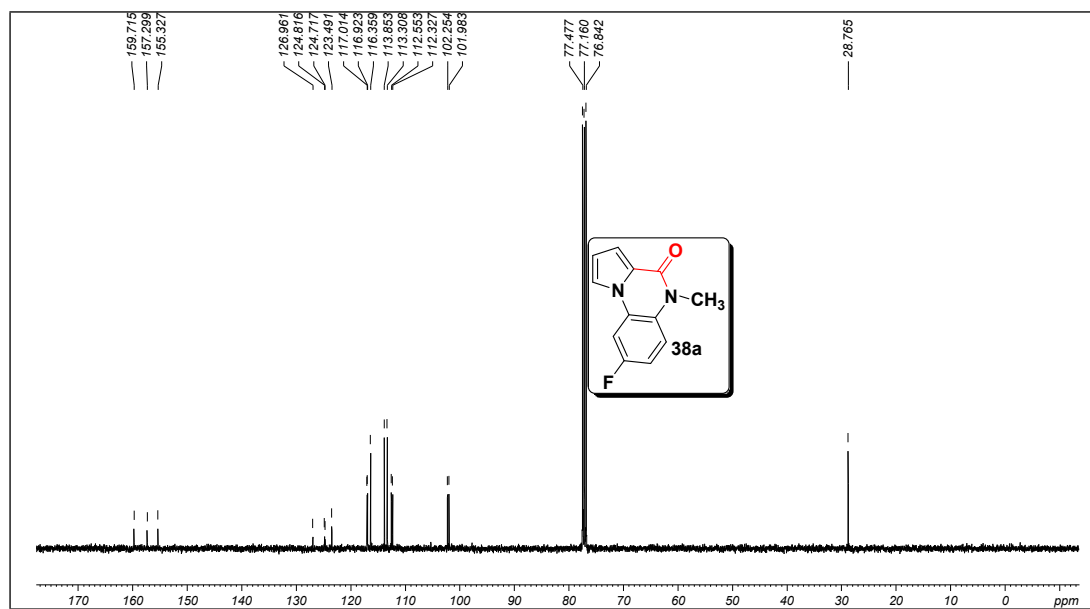

Figure S74. 100 MHz  $^{13}\text{C}$  NMR spectrum of **38a** in  $\text{CDCl}_3$

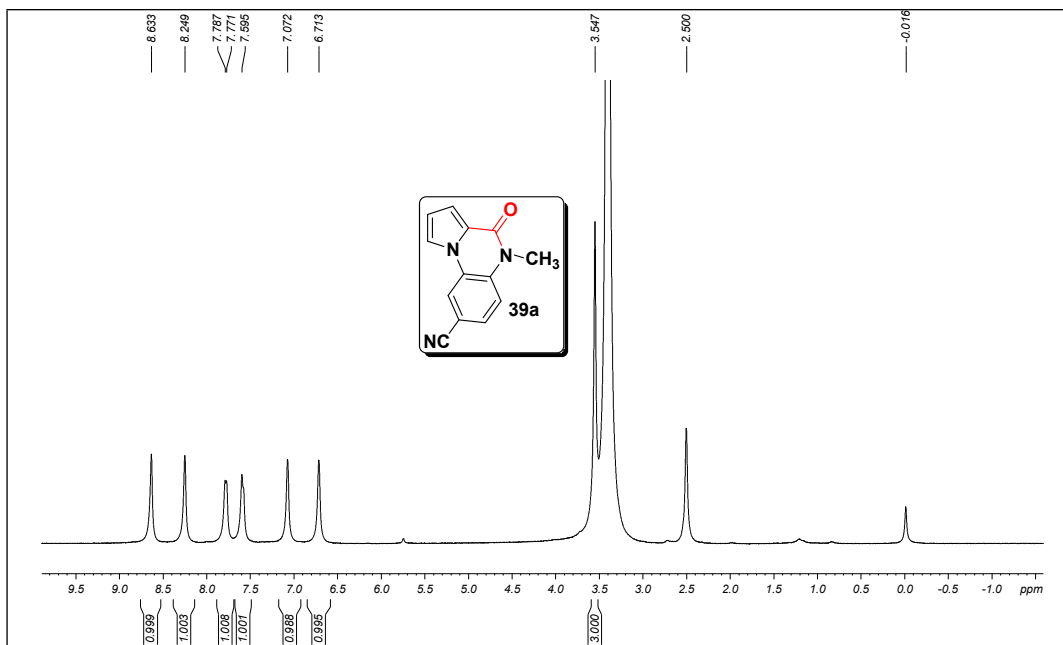

Figure S75. 400 MHz  $^1\text{H}$  NMR spectrum of **39a** in DMSO- $d_6$

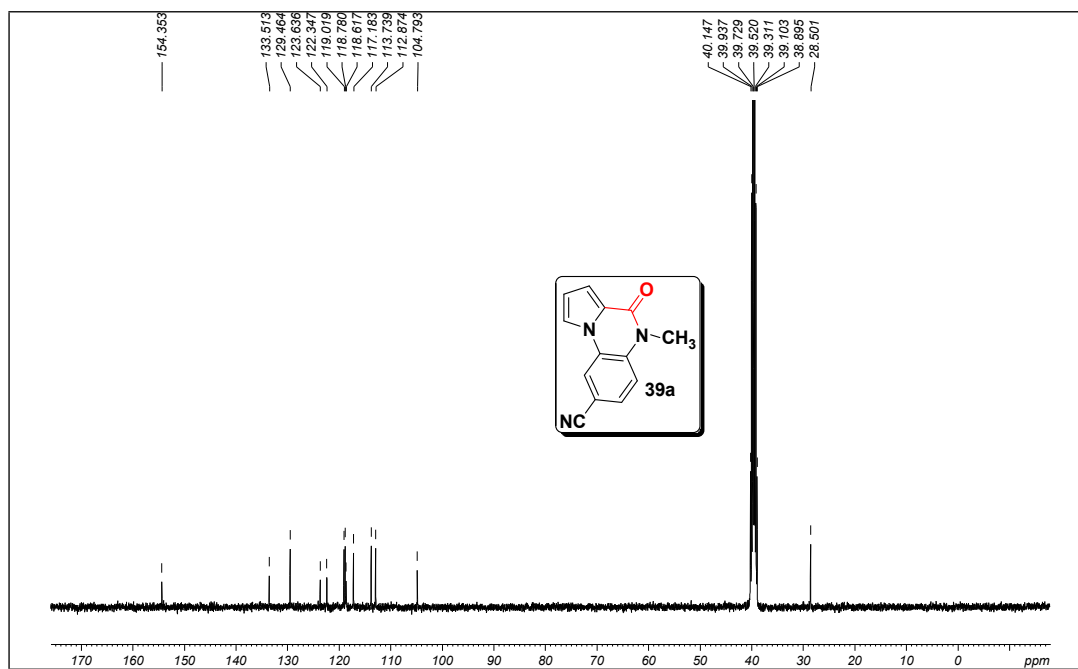

Figure S76. 100 MHz  $^{13}\text{C}$  NMR spectrum of **39a** in DMSO- $d_6$

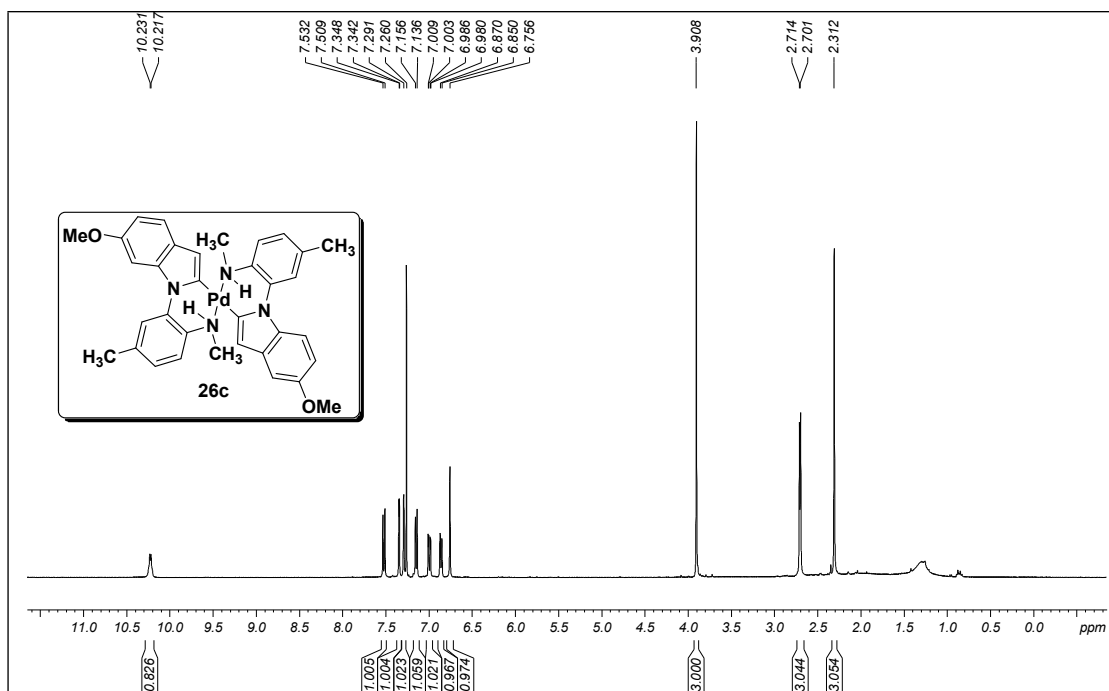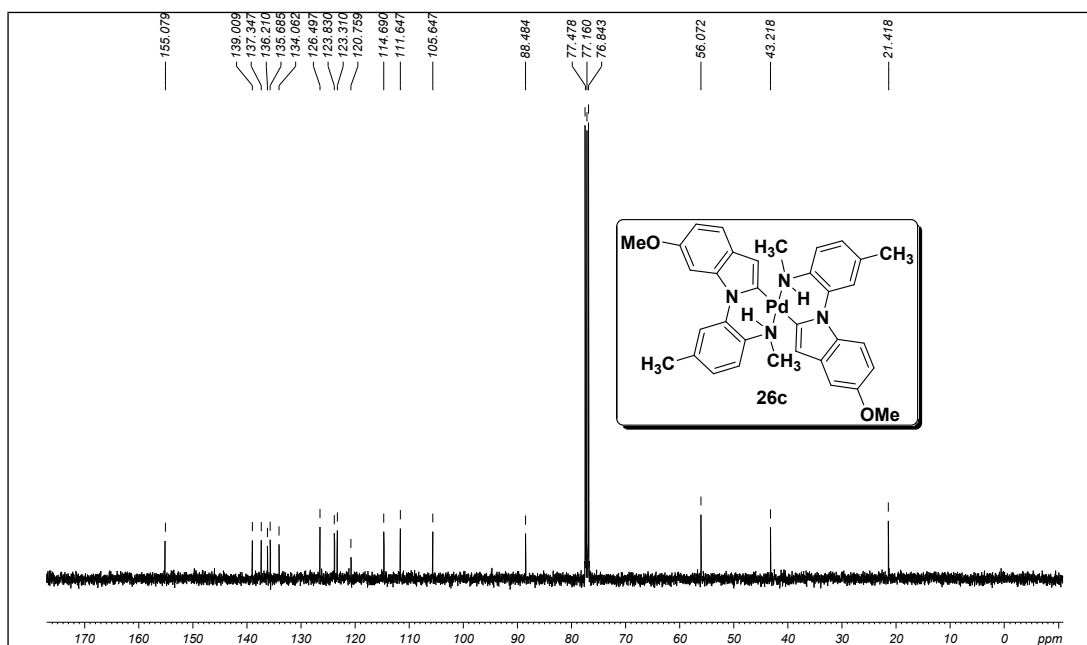

## XI. NMR Spectra of the substrates

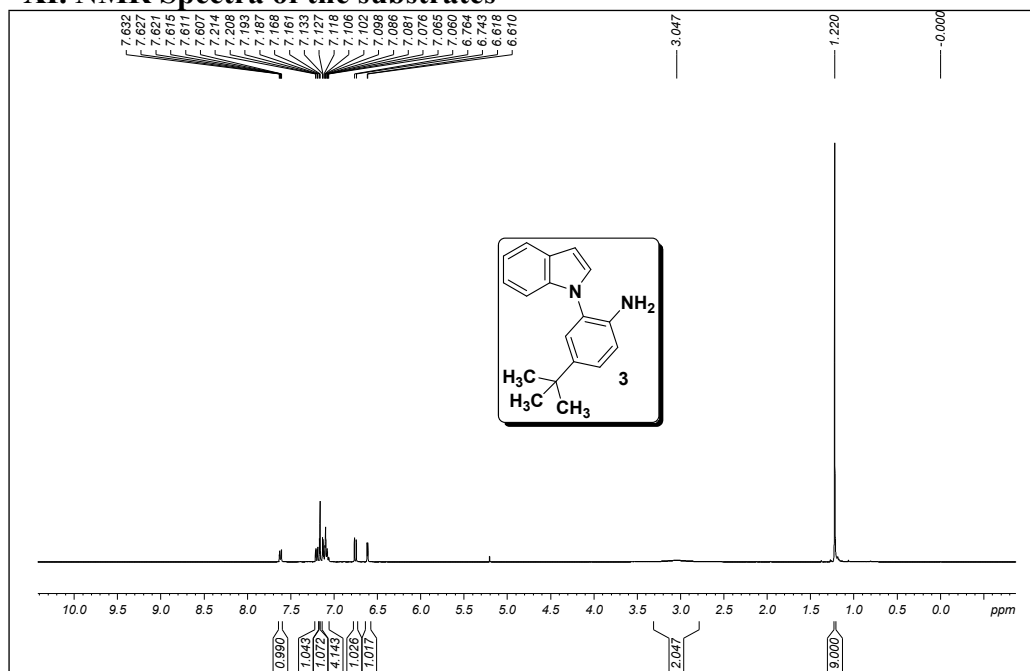

Figure S79. 400 MHz <sup>1</sup>H NMR spectrum of **3** in CDCl<sub>3</sub>

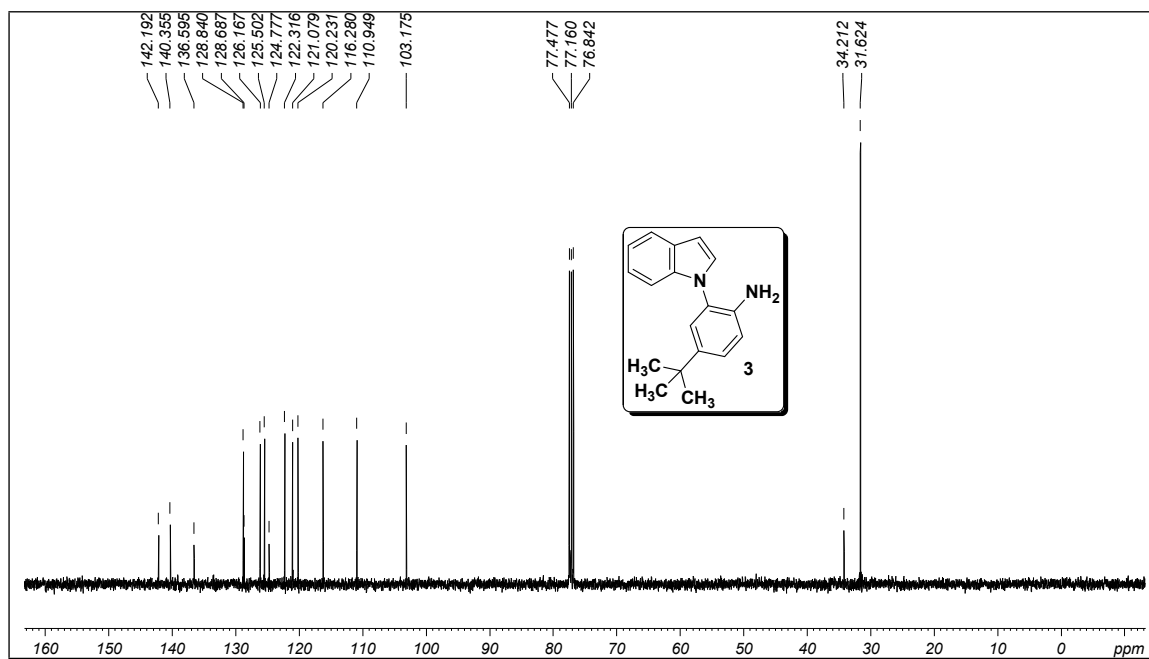

Figure S80. 100 MHz <sup>13</sup>C NMR spectrum of **3** in CDCl<sub>3</sub>

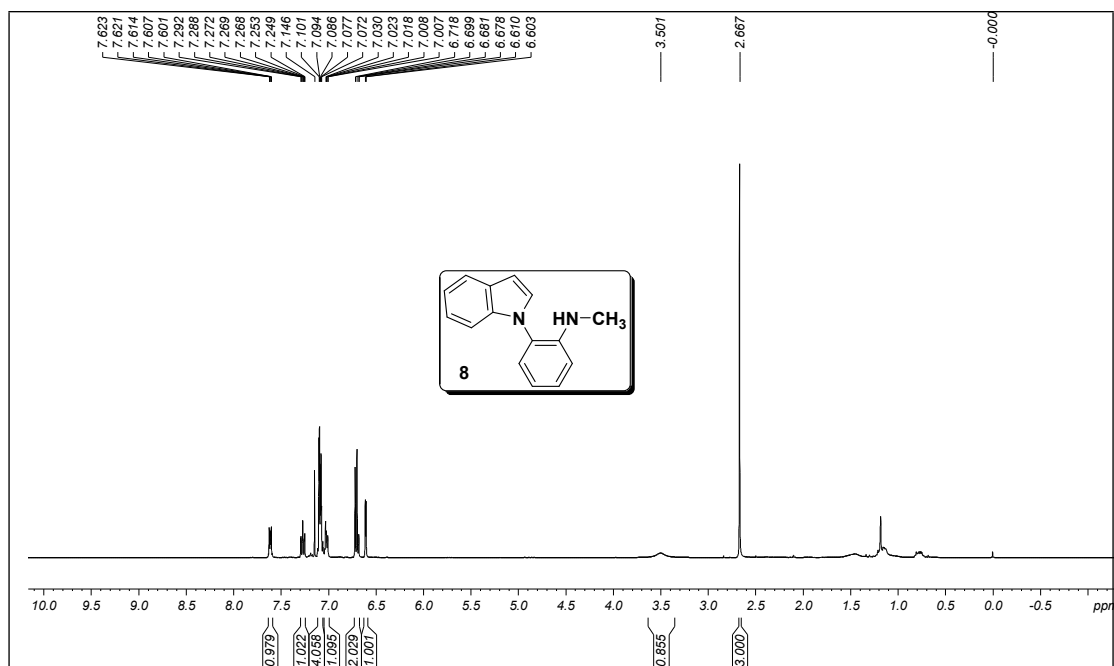

Figure S81. 400 MHz <sup>1</sup>H NMR spectrum of **8** in CDCl<sub>3</sub>

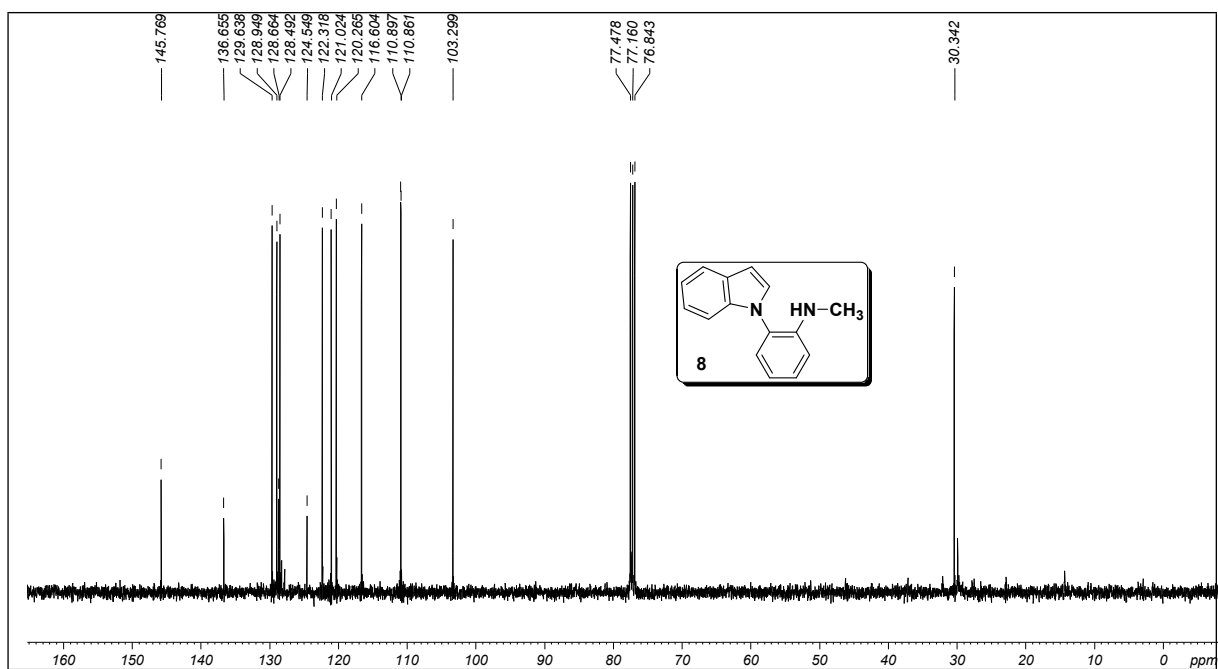

Figure S82. 100 MHz <sup>13</sup>C NMR spectrum of **8** in CDCl<sub>3</sub>

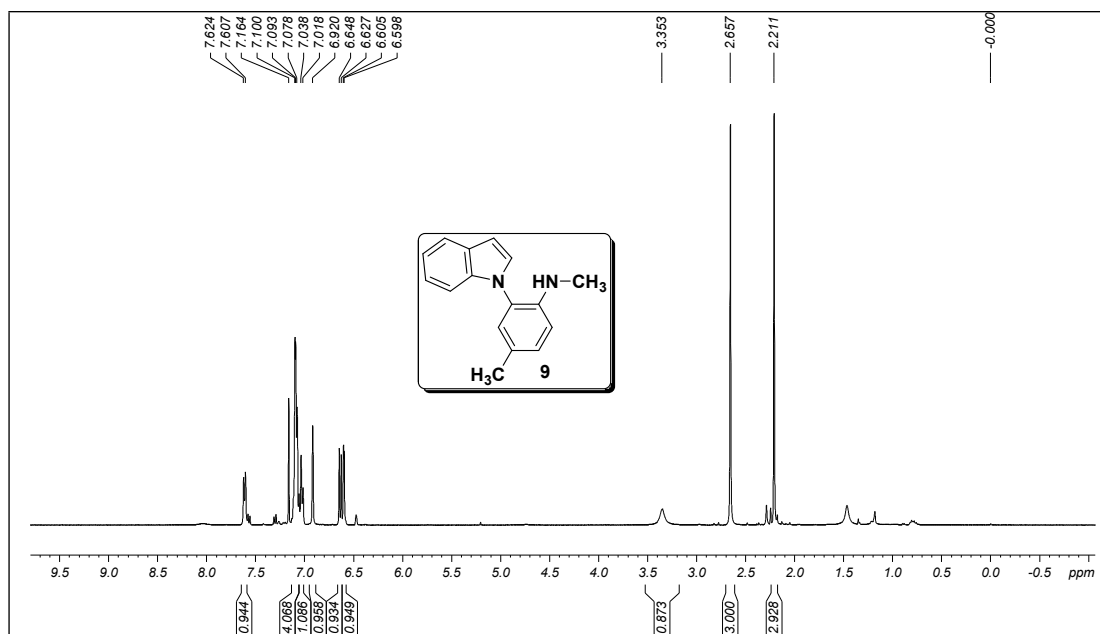

Figure S83. 400 MHz <sup>1</sup>H NMR spectrum of **9** in CDCl<sub>3</sub>

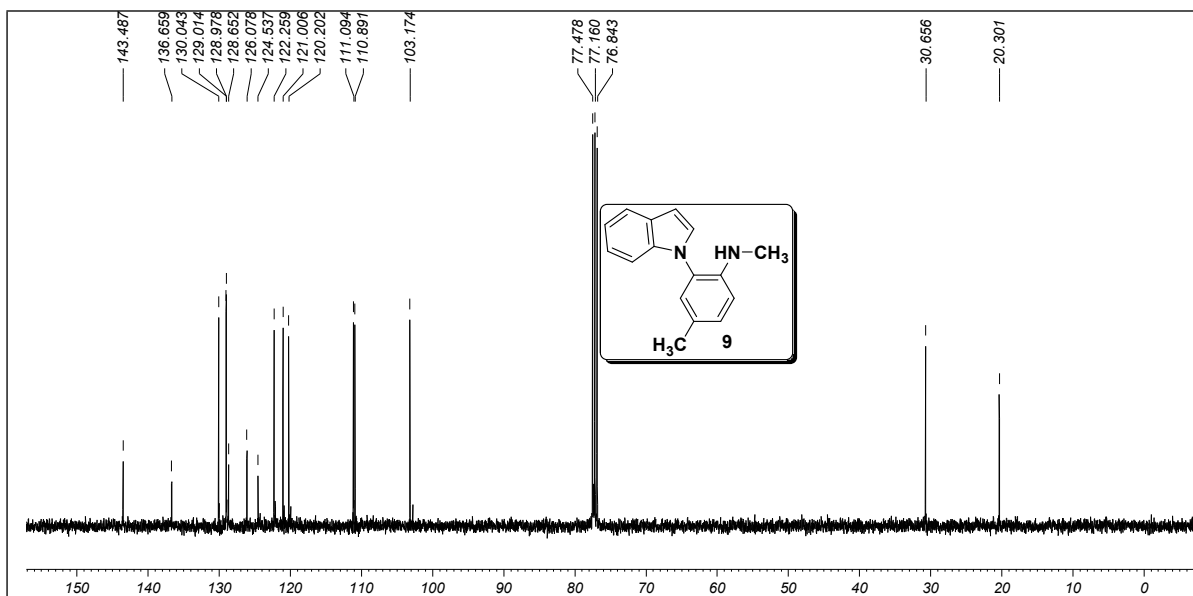

Figure S84. 100 MHz <sup>13</sup>C NMR spectrum of **9** in CDCl<sub>3</sub>

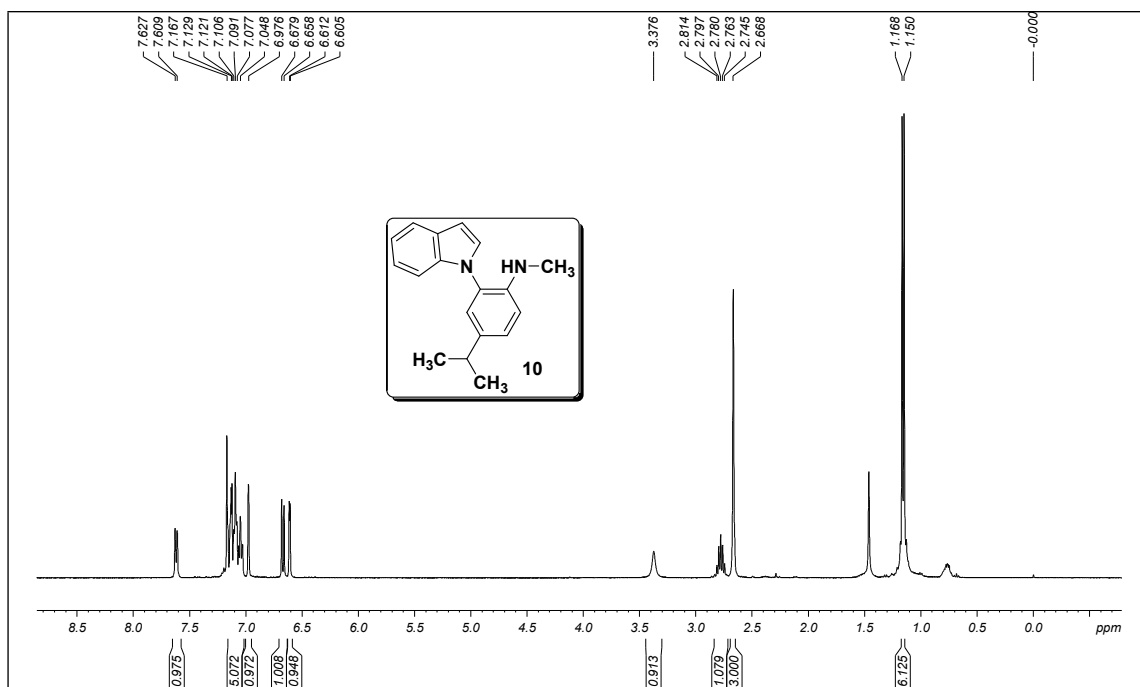

Figure S85. 400 MHz  $^1\text{H}$  NMR spectrum of **10** in  $\text{CDCl}_3$

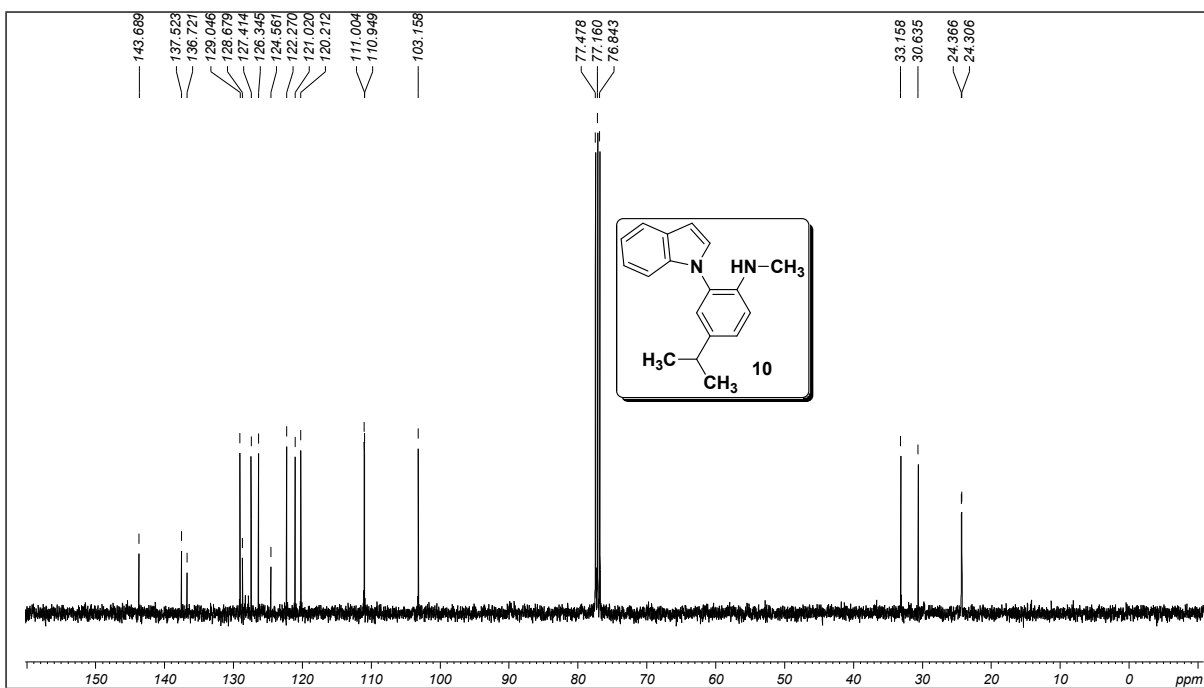

Figure S86. 100 MHz  $^{13}\text{C}$  NMR spectrum of **10** in  $\text{CDCl}_3$

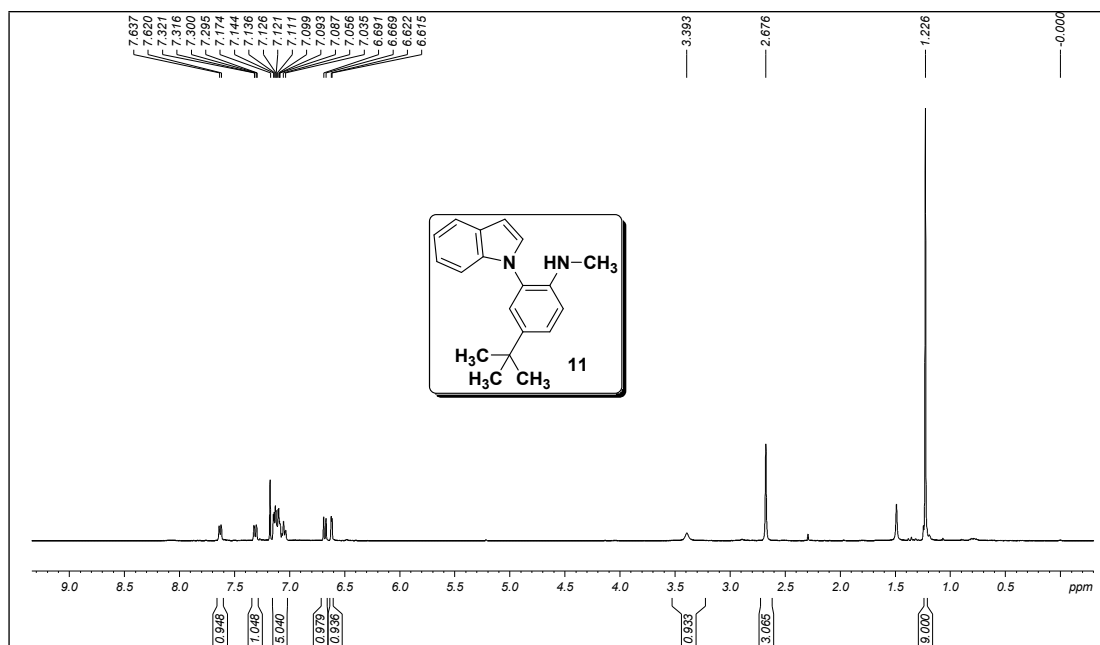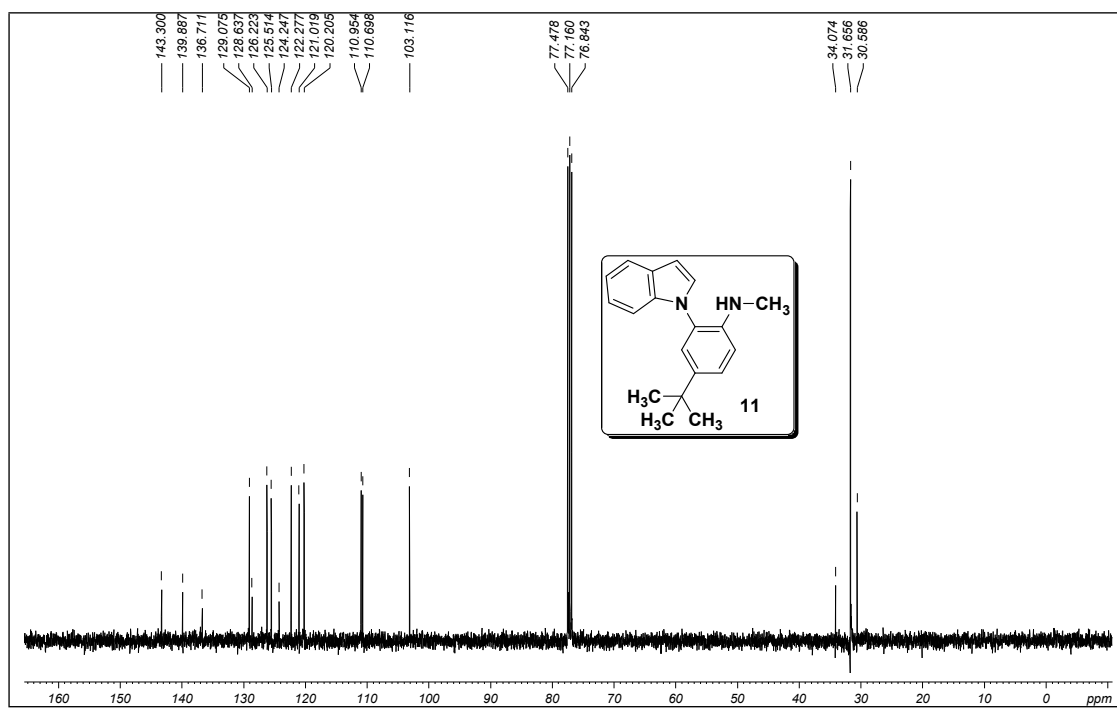



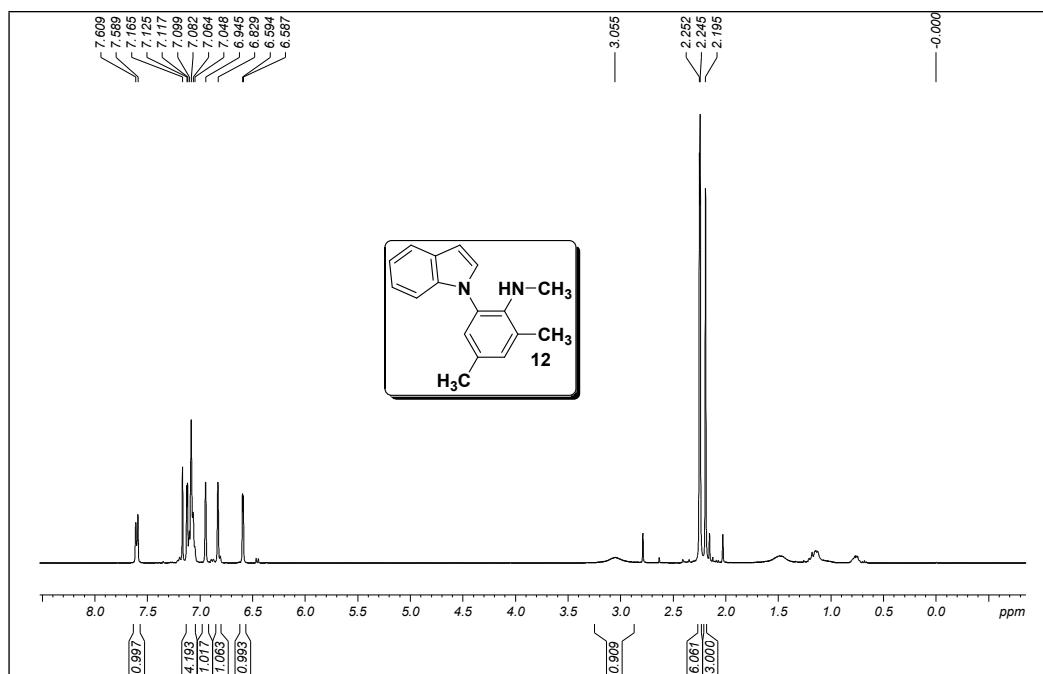

Figure S89. 400 MHz <sup>1</sup>H NMR spectrum of **12** in CDCl<sub>3</sub>

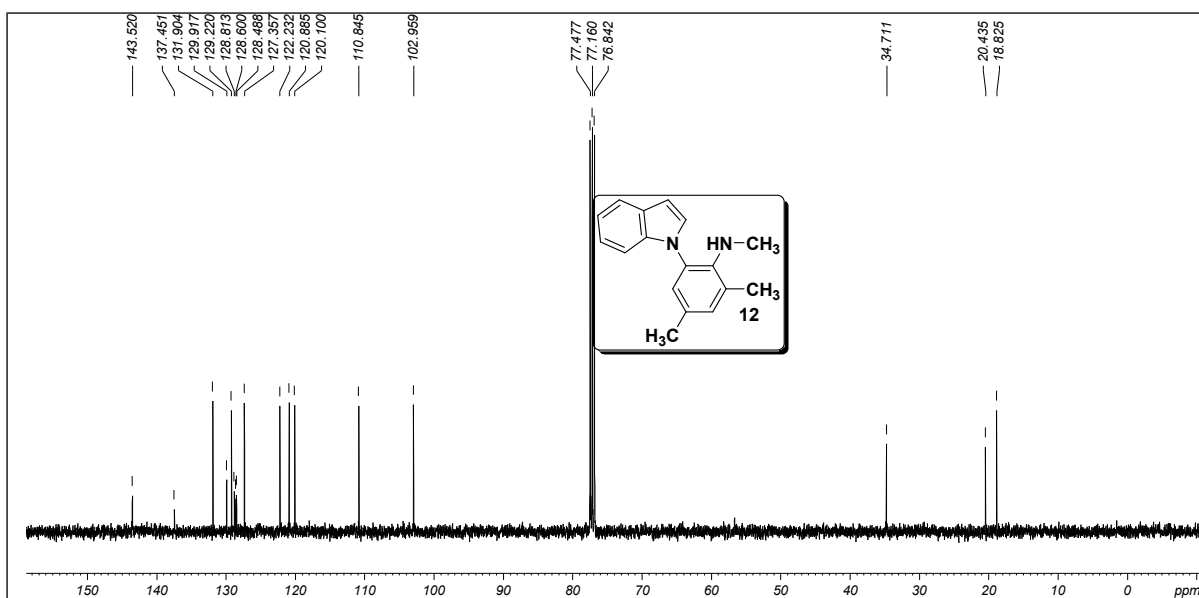

Figure S90. 100 MHz <sup>13</sup>C NMR spectrum of **12** in CDCl<sub>3</sub>

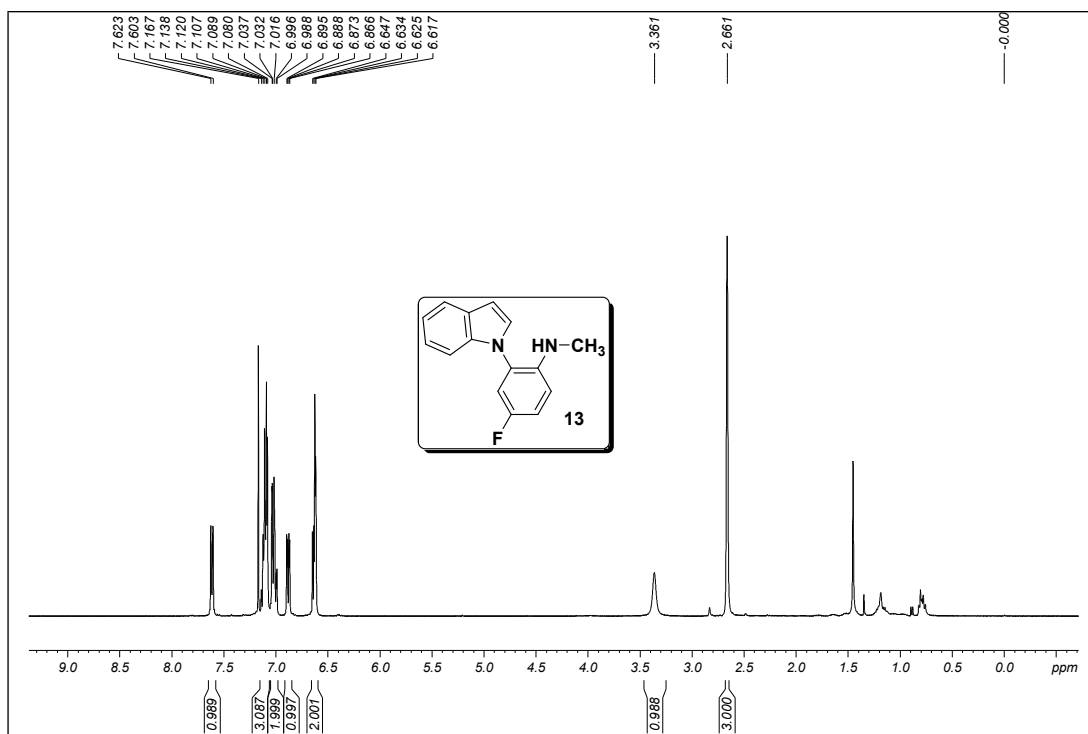

Figure S91. 400 MHz  $^1\text{H}$  NMR spectrum of **13** in  $\text{CDCl}_3$

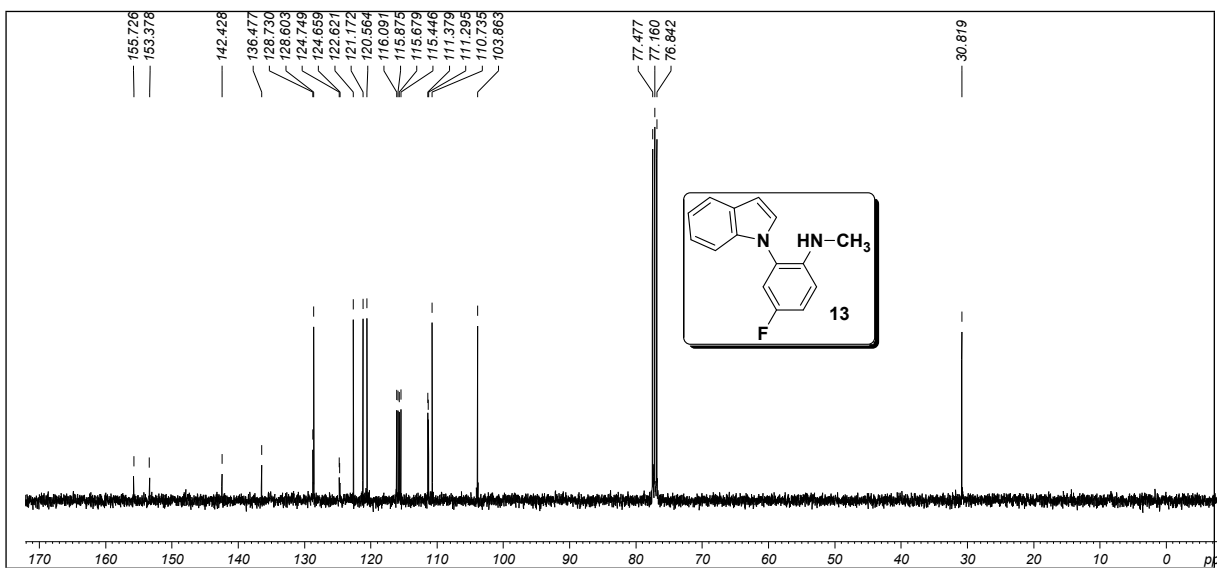

Figure S92. 100 MHz  $^{13}\text{C}$  NMR spectrum of **13** in  $\text{CDCl}_3$

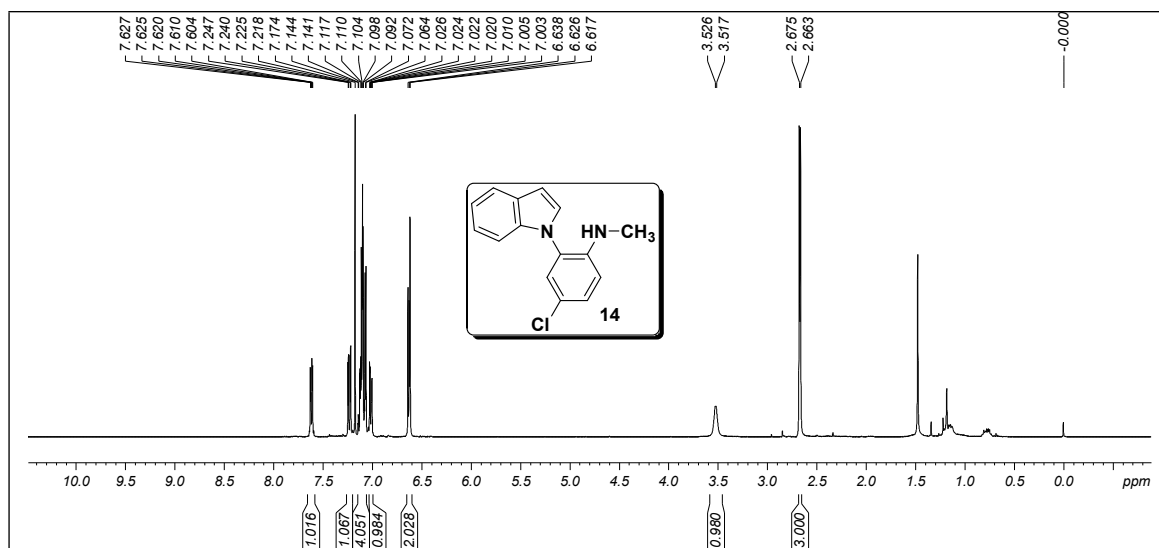

Figure S93. 400 MHz  $^1\text{H}$  NMR spectrum of **14** in  $\text{CDCl}_3$

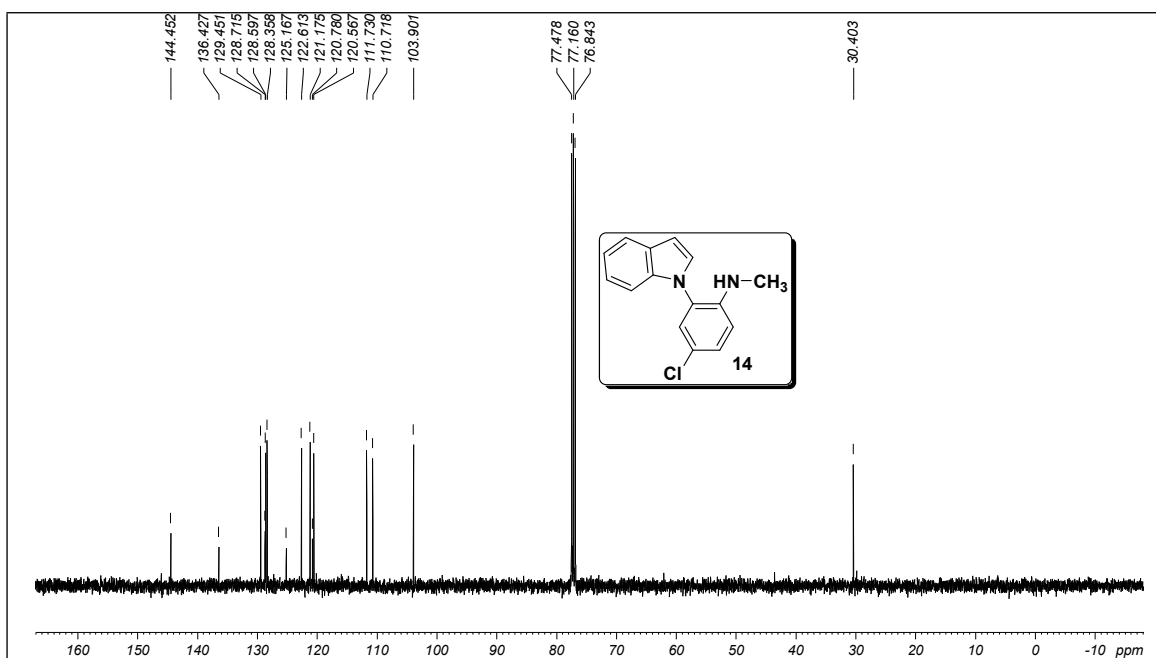

Figure S94. 100 MHz  $^{13}\text{C}$  NMR spectrum of **14** in  $\text{CDCl}_3$

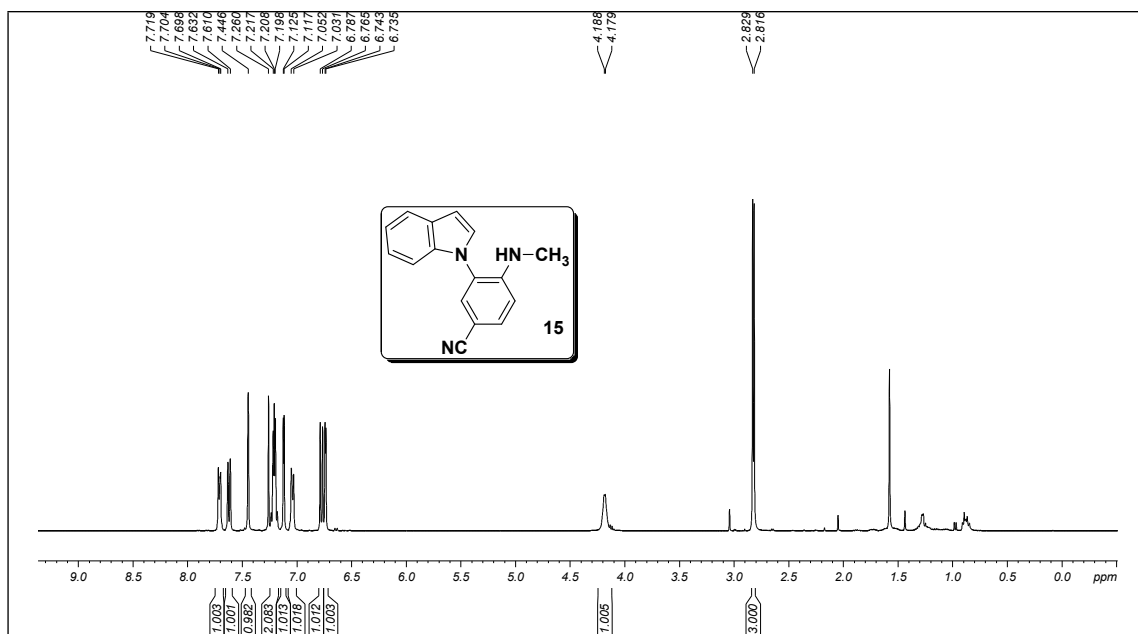

Figure S95. 400 MHz  $^1\text{H}$  NMR spectrum of **15** in  $\text{CDCl}_3$

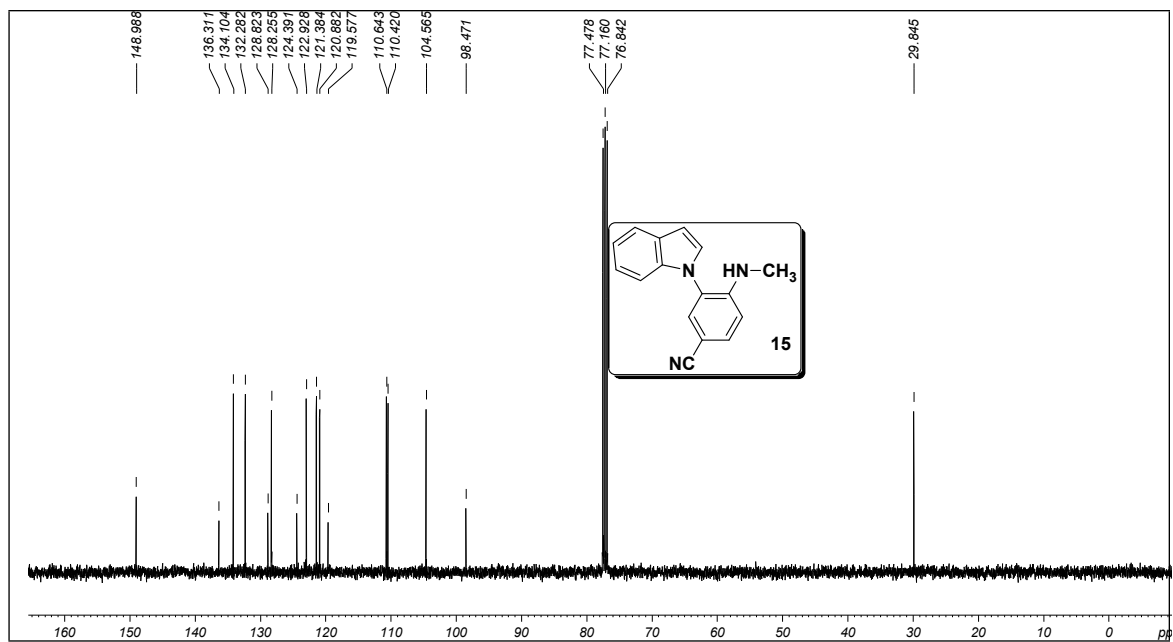

Figure S96. 100 MHz  $^{13}\text{C}$  NMR spectrum of **15** in  $\text{CDCl}_3$

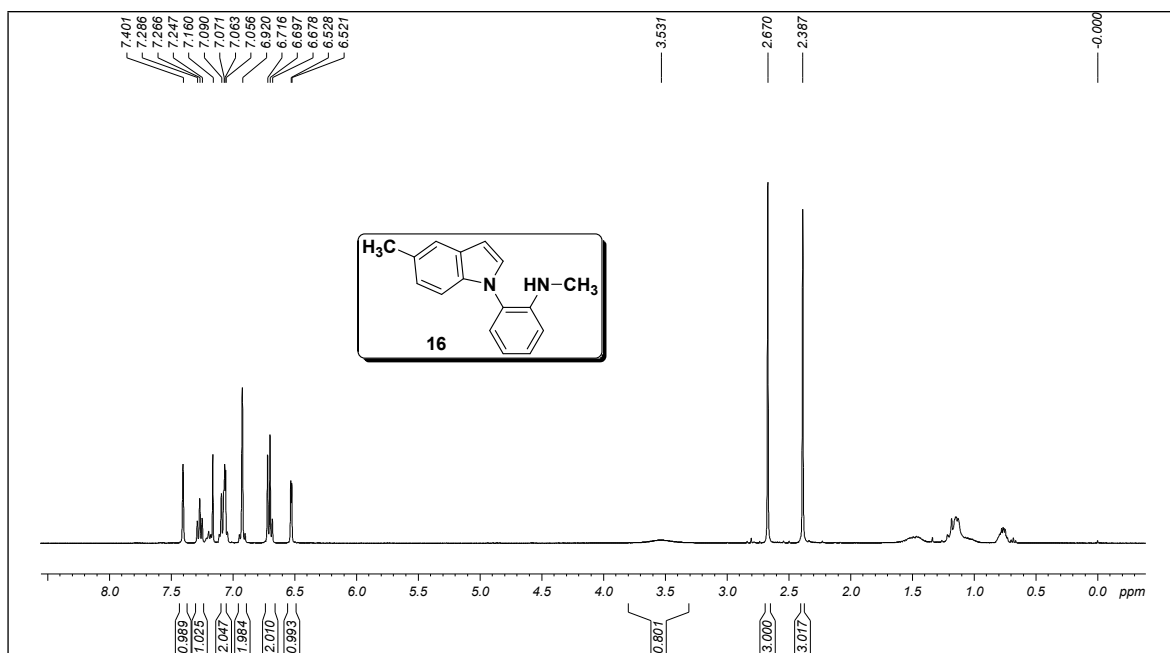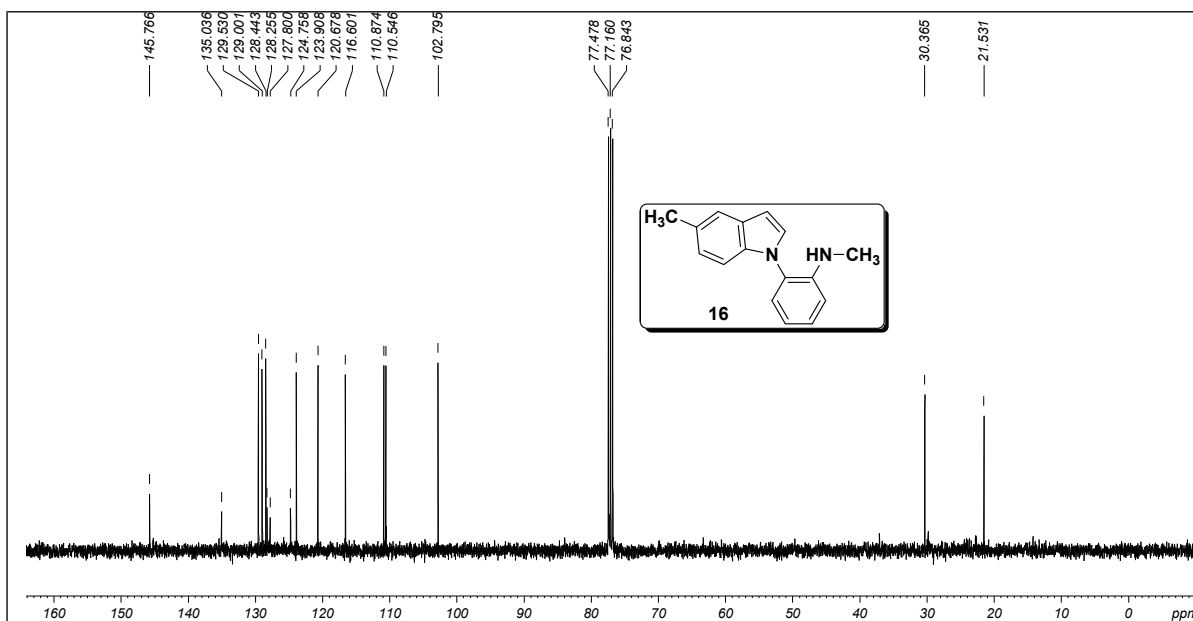

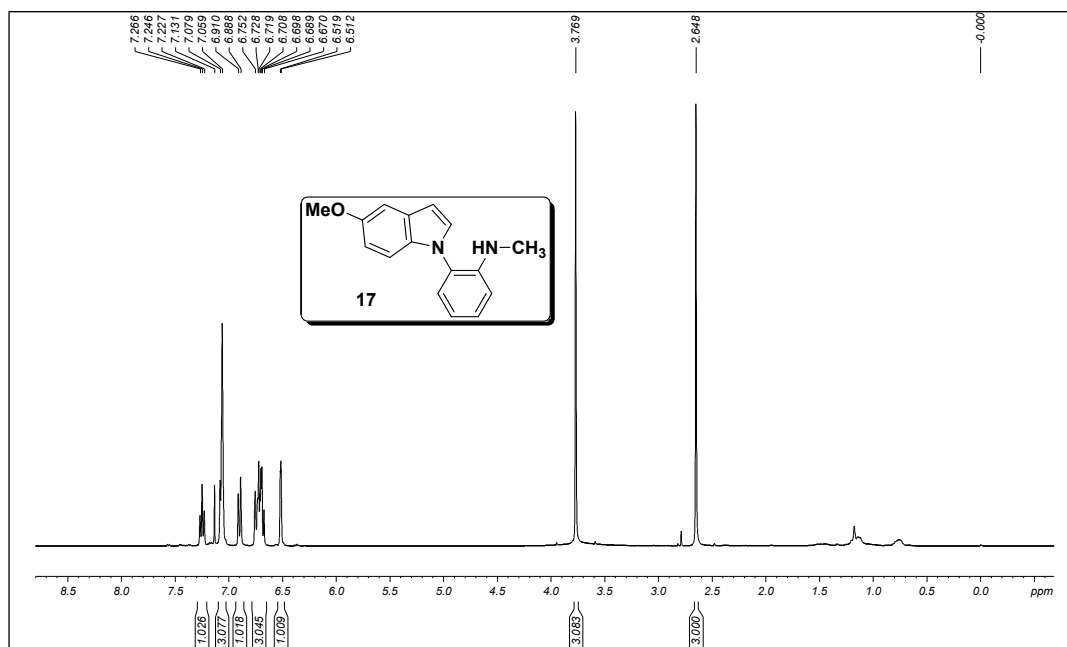

Figure S99. 400 MHz  $^1\text{H}$  NMR spectrum of 17 in  $\text{CDCl}_3$

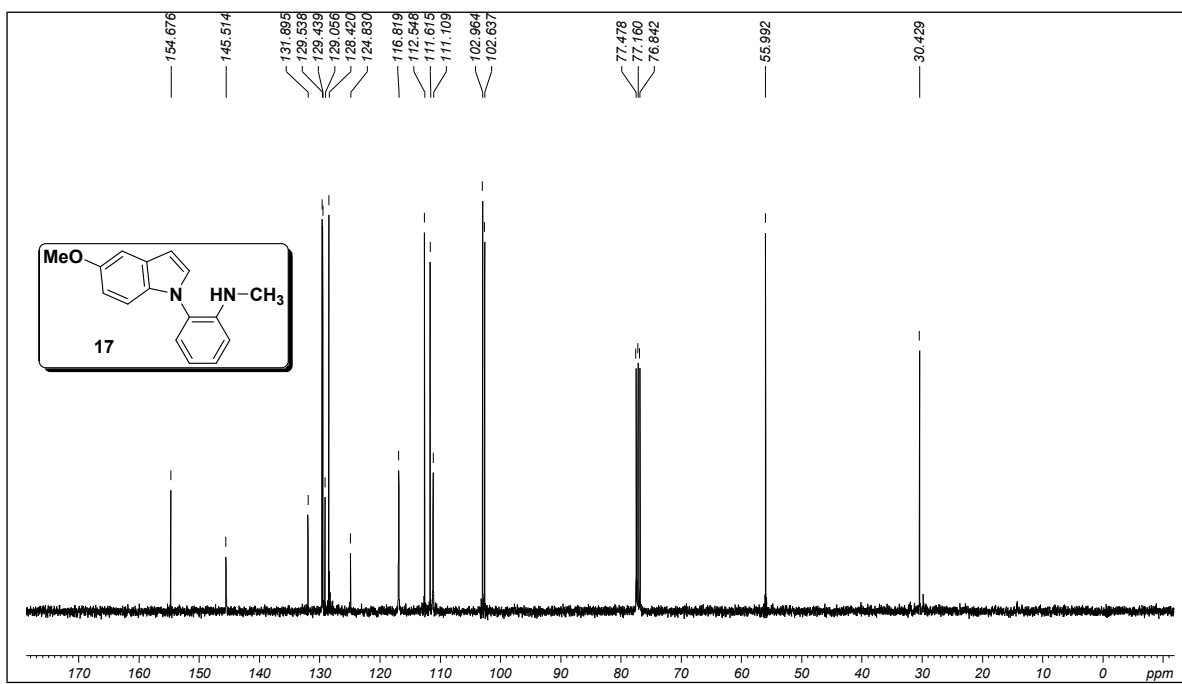

Figure S100. 100 MHz  $^{13}\text{C}$  NMR spectrum of 17 in  $\text{CDCl}_3$

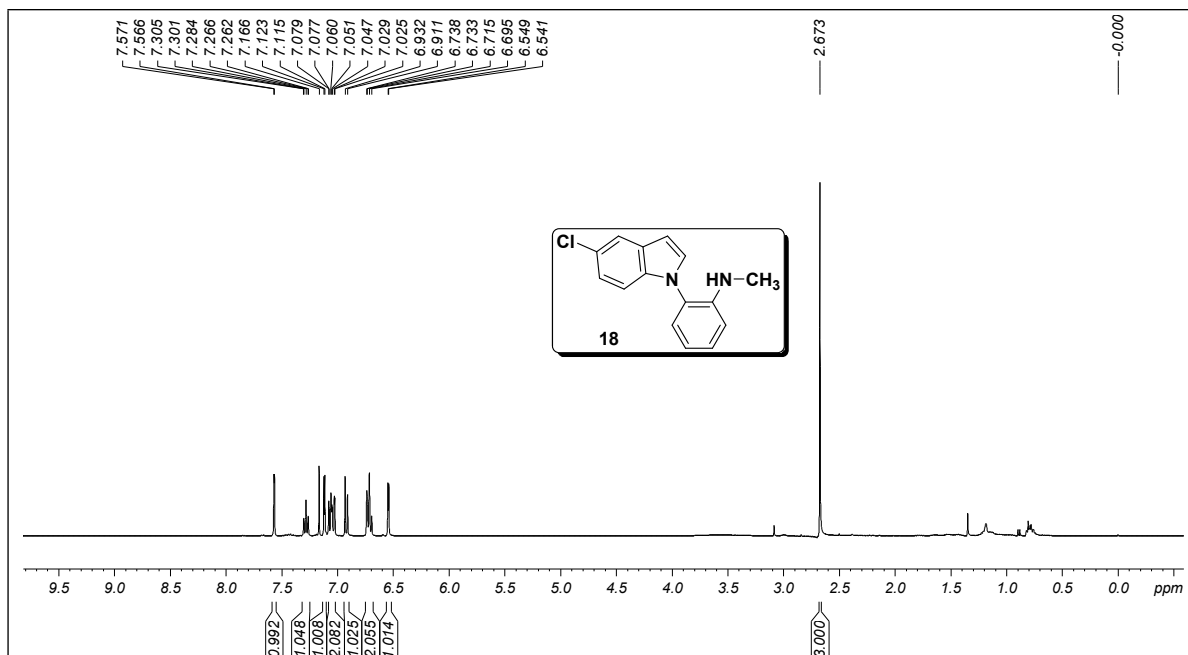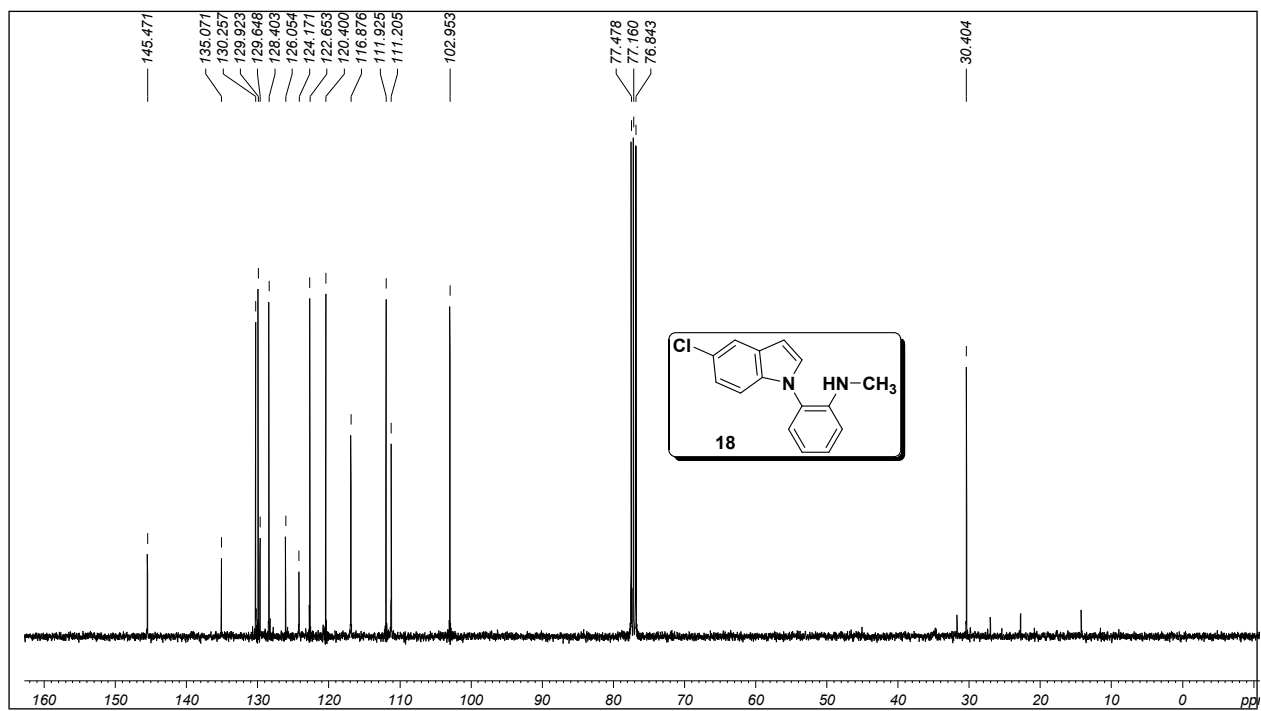

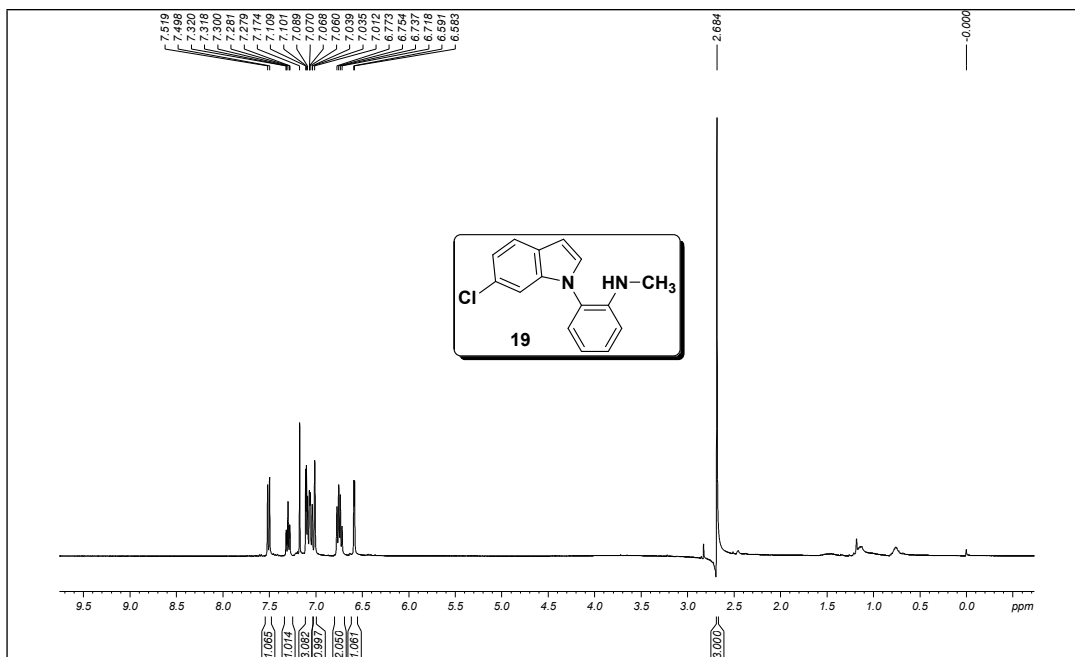

Figure S103. 400 MHz <sup>1</sup>H NMR spectrum of **19** in CDCl<sub>3</sub>

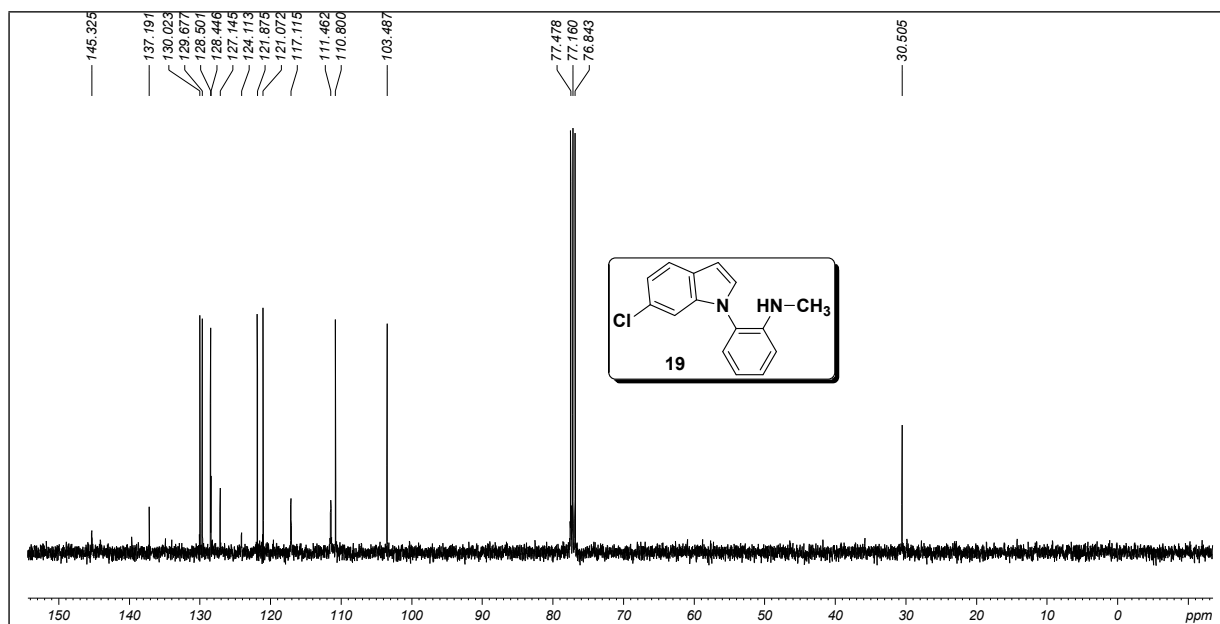

Figure S104. 100 MHz <sup>13</sup>C NMR spectrum of **19** in CDCl<sub>3</sub>



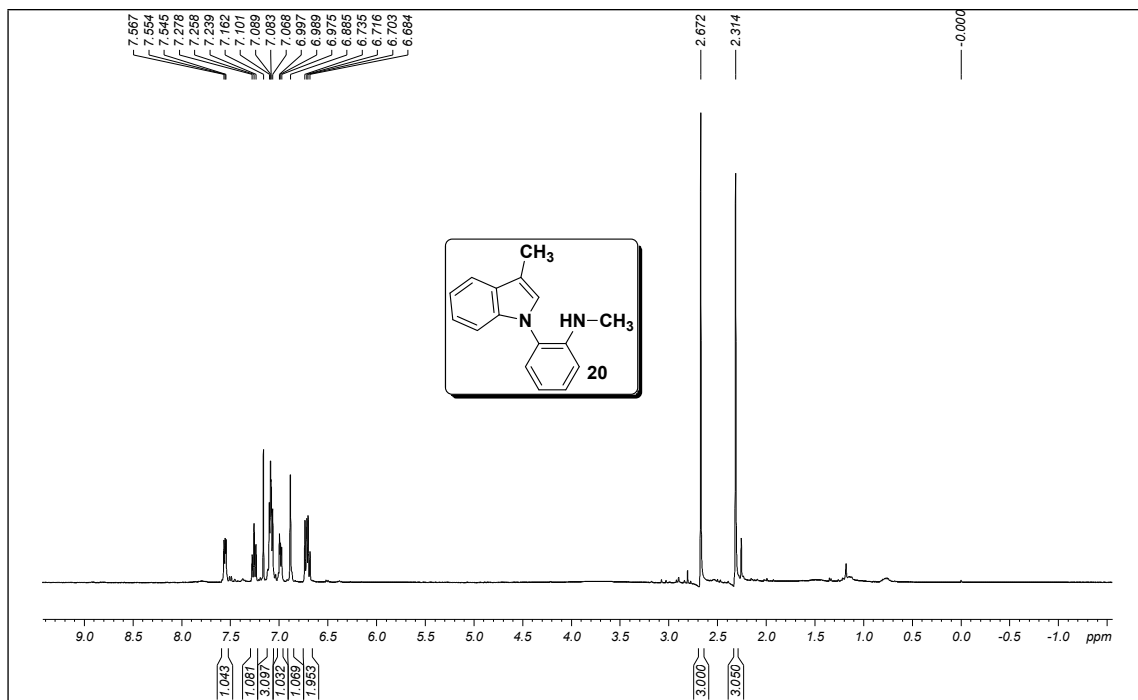

Figure S105. 400 MHz <sup>1</sup>H NMR spectrum of **20** in CDCl<sub>3</sub>

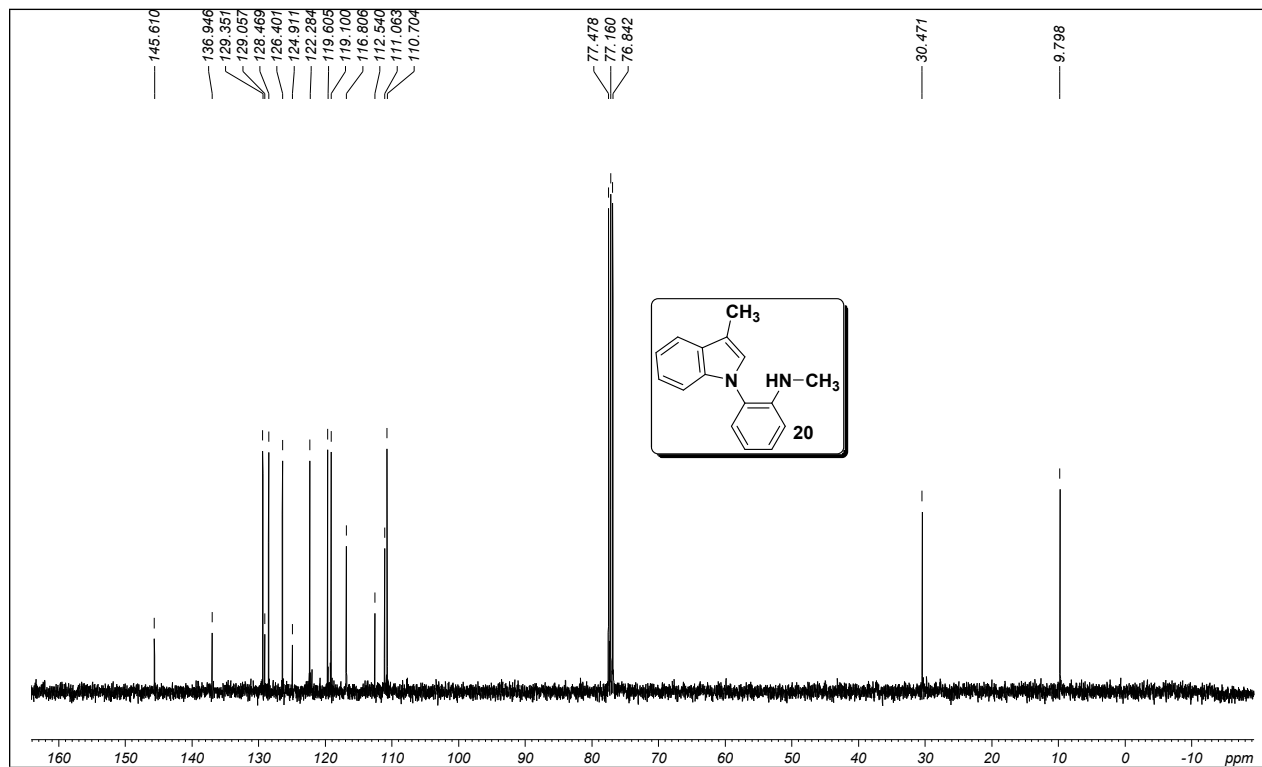

Figure S106. 100 MHz <sup>13</sup>C NMR spectrum of **20** in CDCl<sub>3</sub>

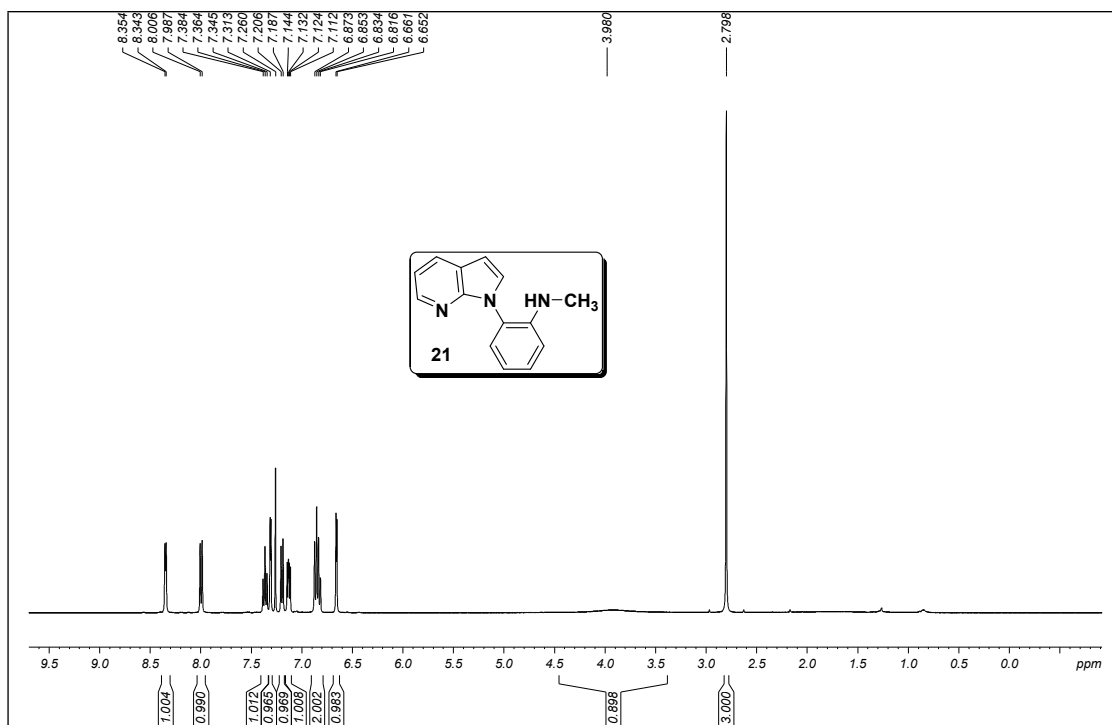

Figure S107. 400 MHz  $^1\text{H}$  NMR spectrum of **21** in  $\text{CDCl}_3$

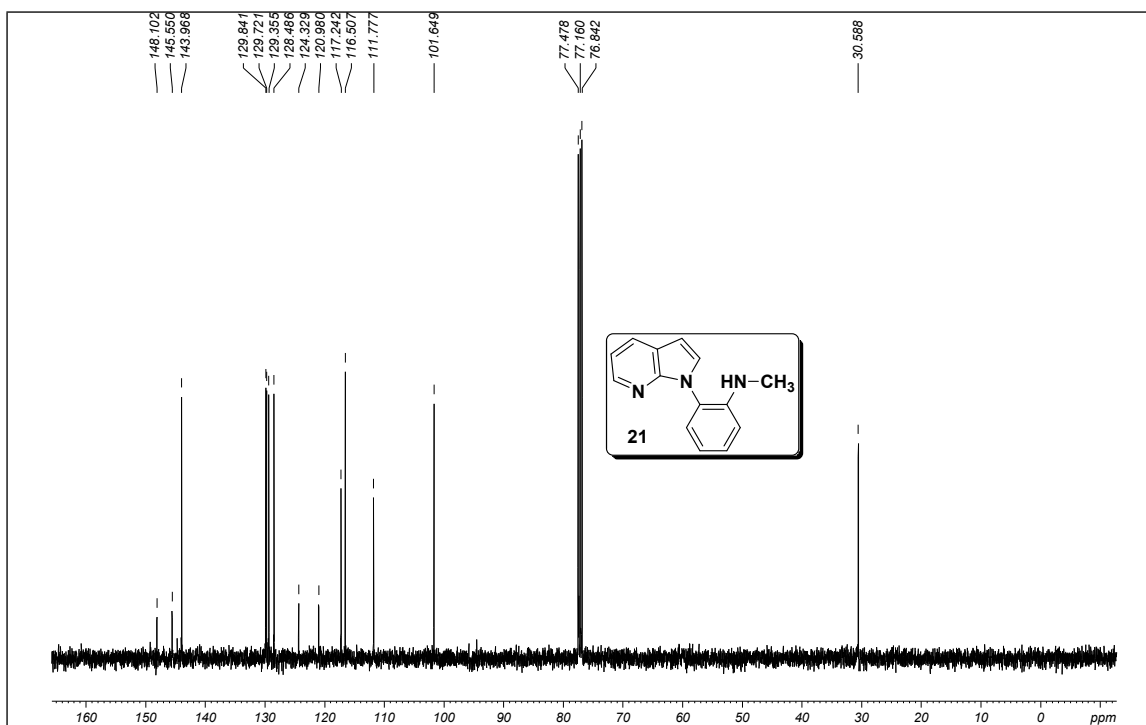

Figure S108. 100 MHz  $^{13}\text{C}$  NMR spectrum of **21** in  $\text{CDCl}_3$

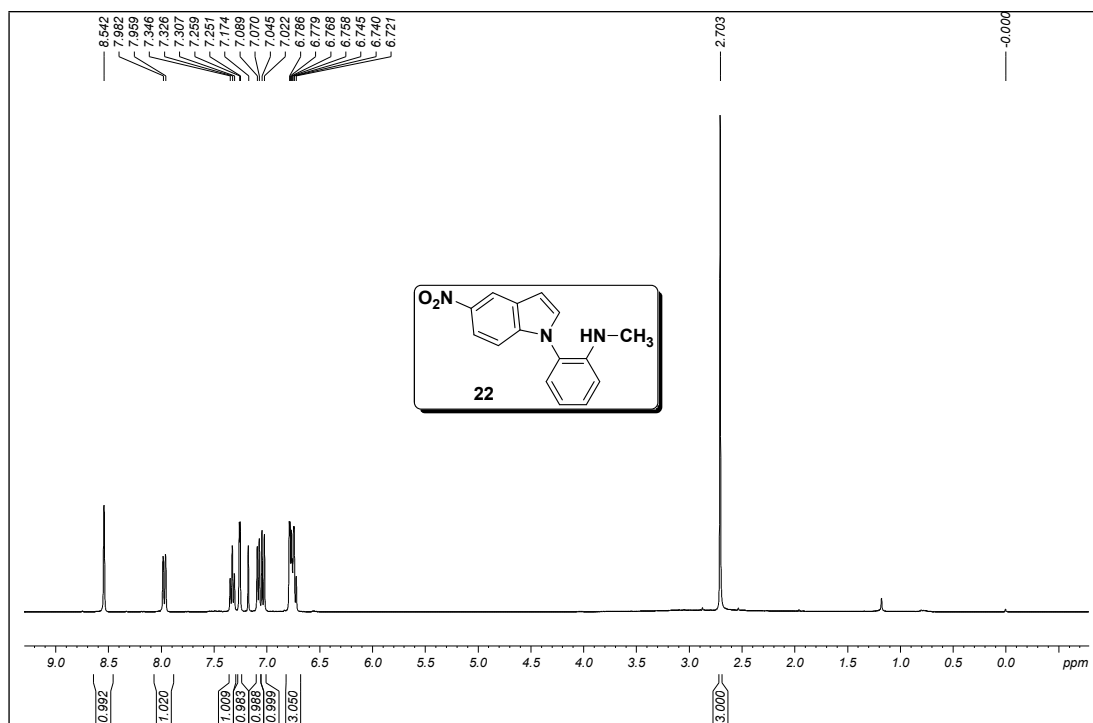

Figure S109. 400 MHz  $^1\text{H}$  NMR spectrum of **22** in  $\text{CDCl}_3$

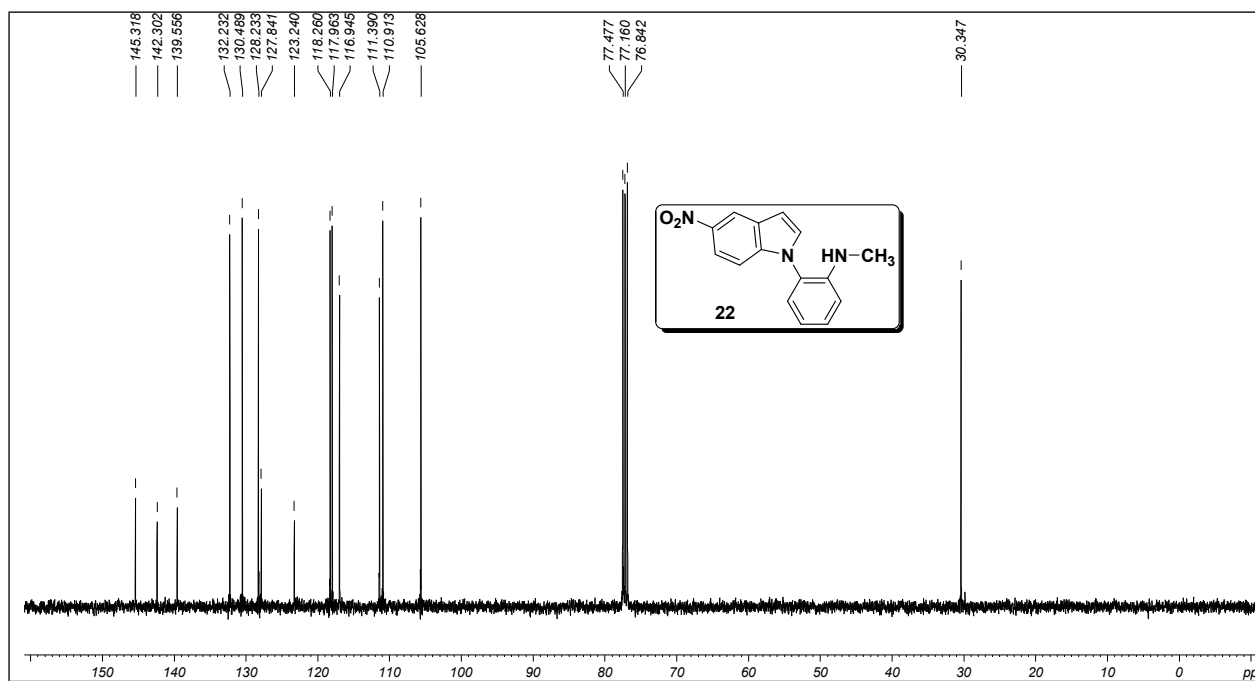

Figure S110. 100 MHz  $^{13}\text{C}$  NMR spectrum of **22** in  $\text{CDCl}_3$

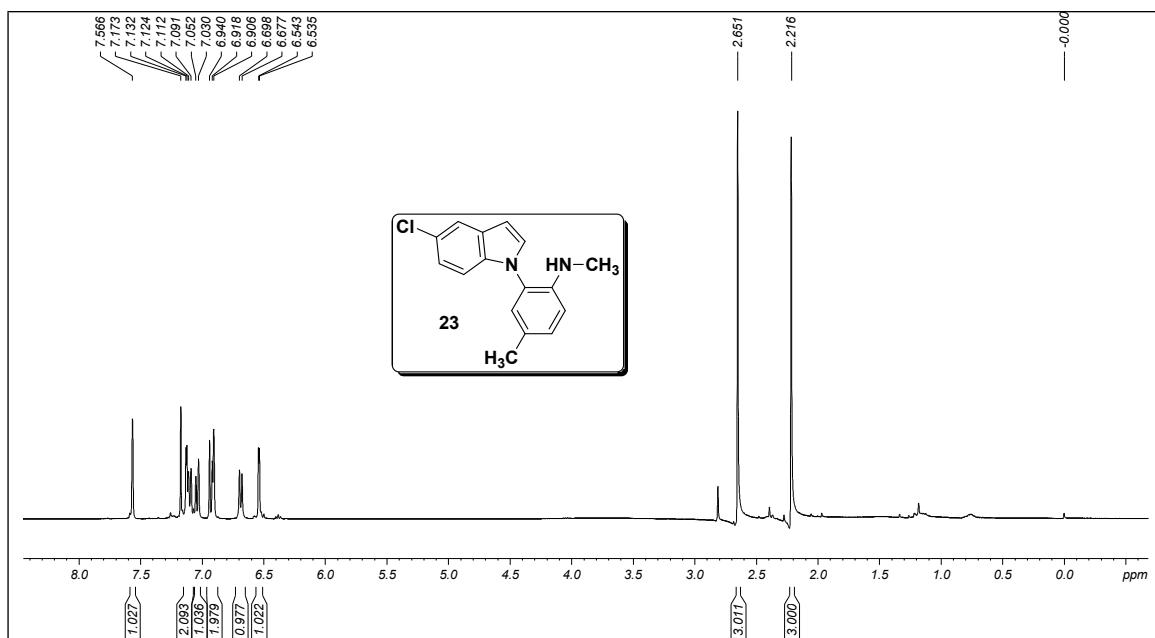

Figure S111. 400 MHz  $^1\text{H}$  NMR spectrum of **23** in  $\text{CDCl}_3$

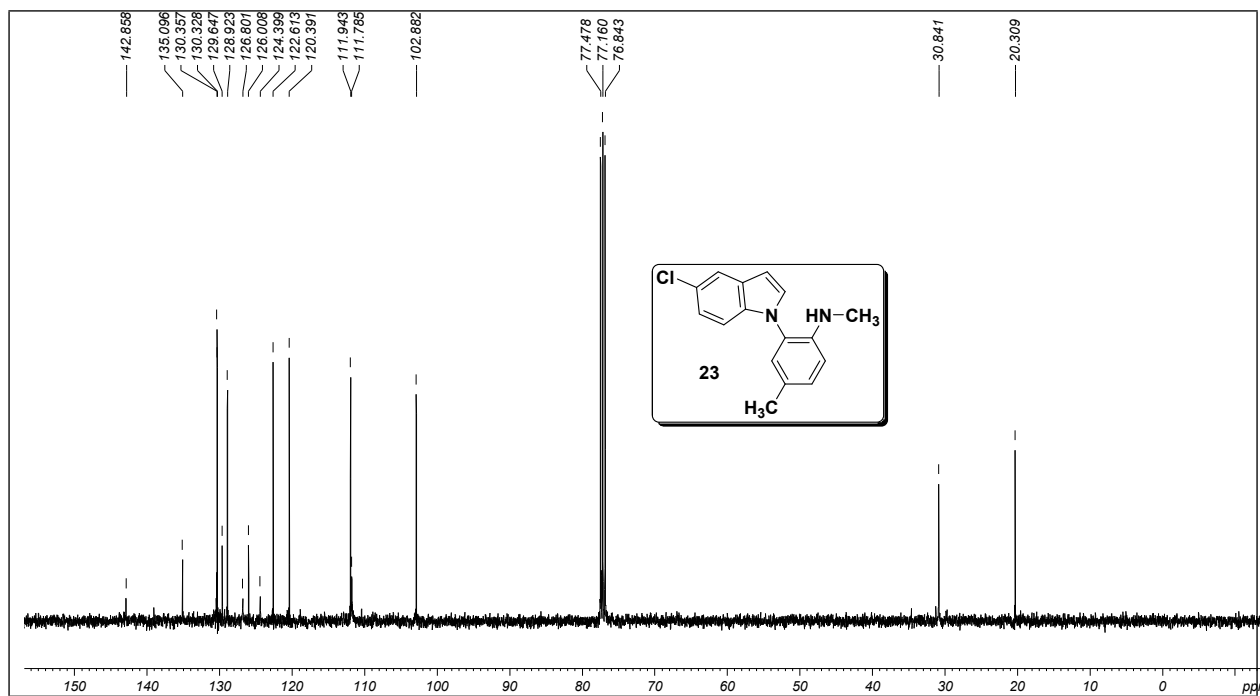

Figure S112. 100 MHz  $^{13}\text{C}$  NMR spectrum of **23** in  $\text{CDCl}_3$

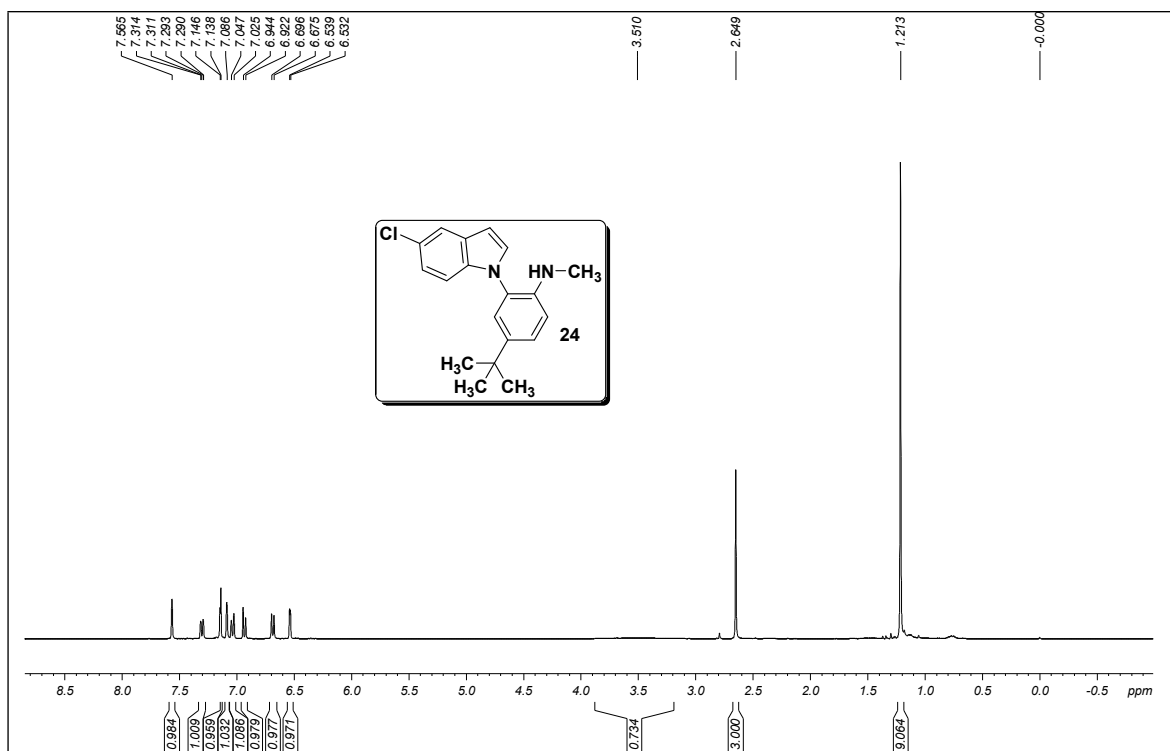

Figure S113. 400 MHz <sup>1</sup>H NMR spectrum of **24** in CDCl<sub>3</sub>

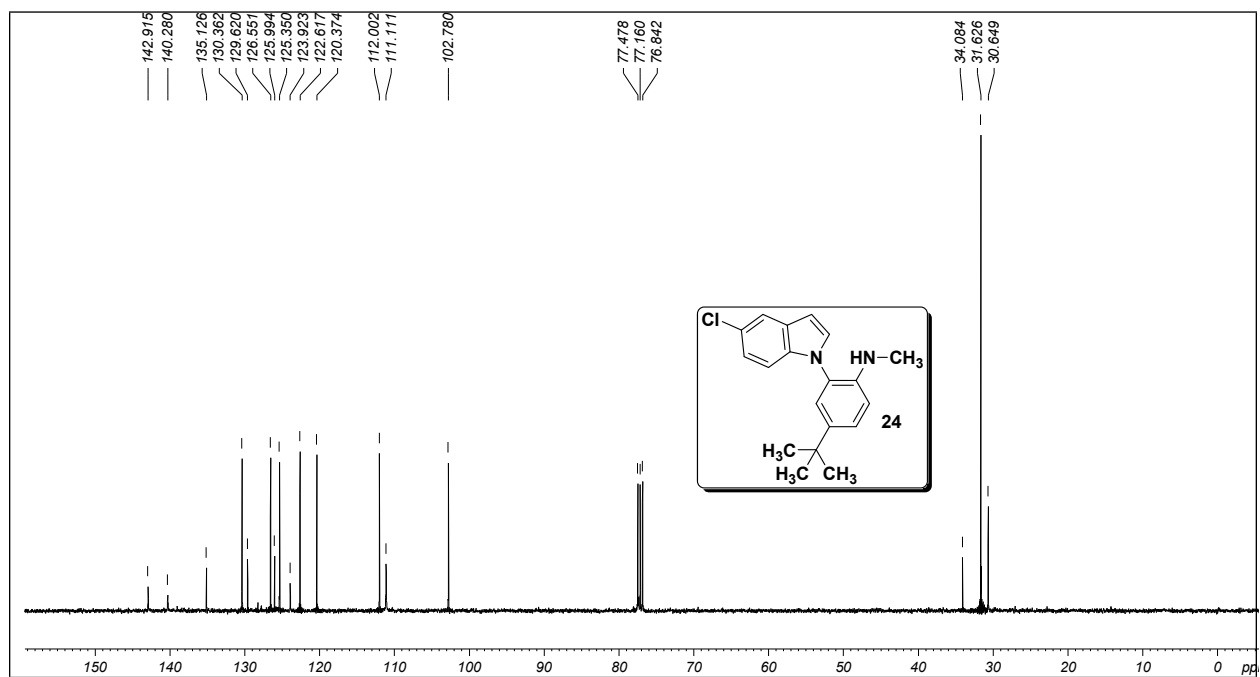

Figure S114. 100 MHz <sup>13</sup>C NMR spectrum of **24** in CDCl<sub>3</sub>

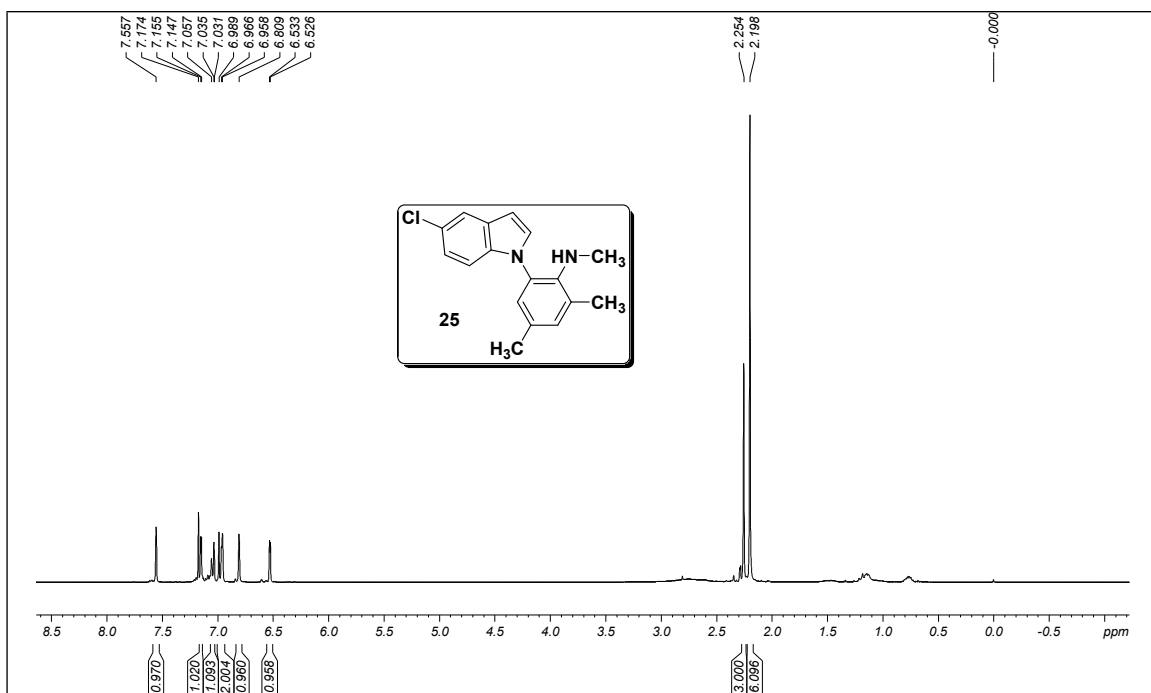

Figure S115. 400 MHz  $^1\text{H}$  NMR spectrum of **25** in  $\text{CDCl}_3$

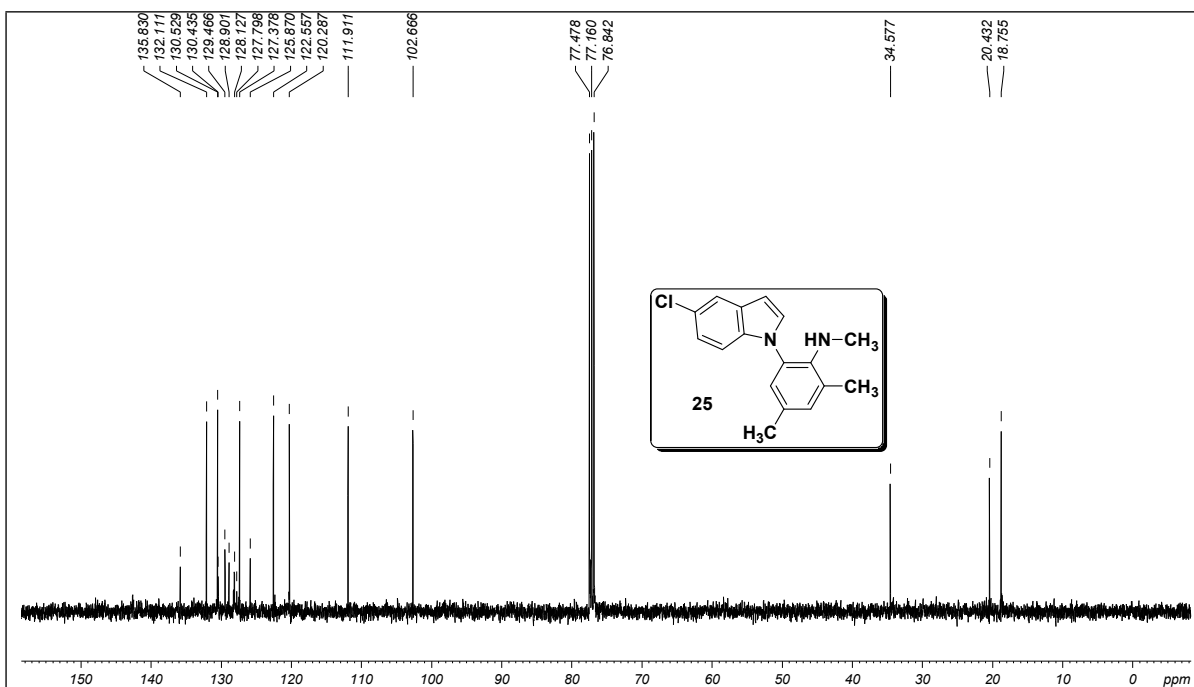

Figure S116. 100 MHz  $^{13}\text{C}$  NMR spectrum of **25** in  $\text{CDCl}_3$

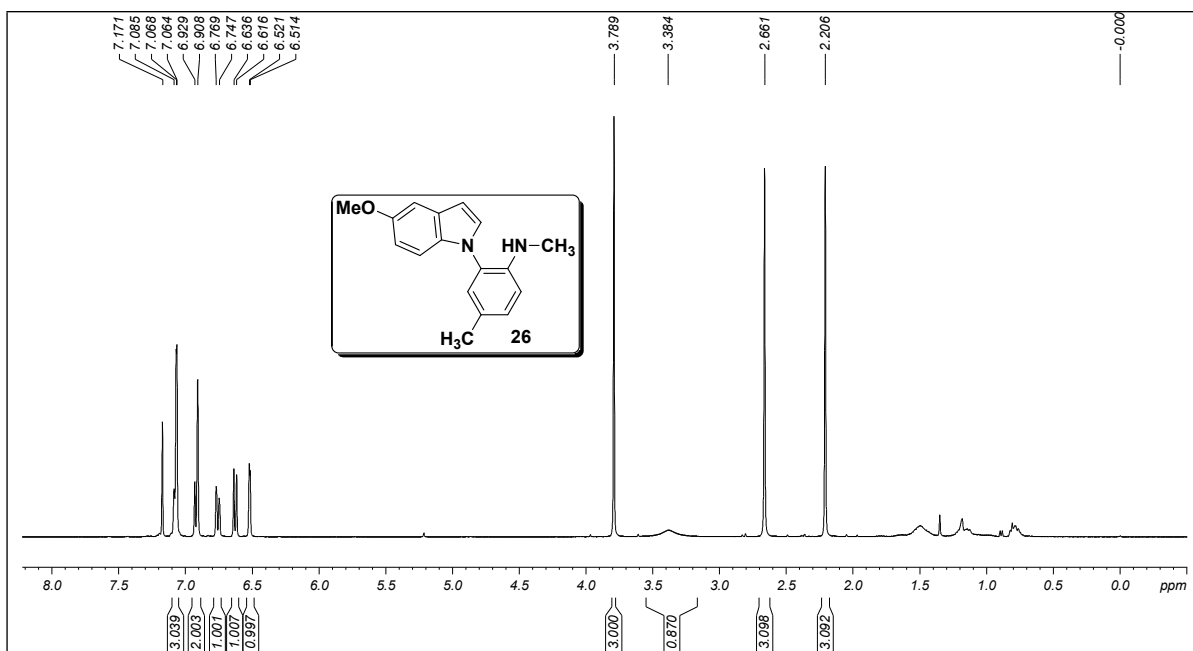

Figure S117. 400 MHz  $^1\text{H}$  NMR spectrum of **26** in  $\text{CDCl}_3$

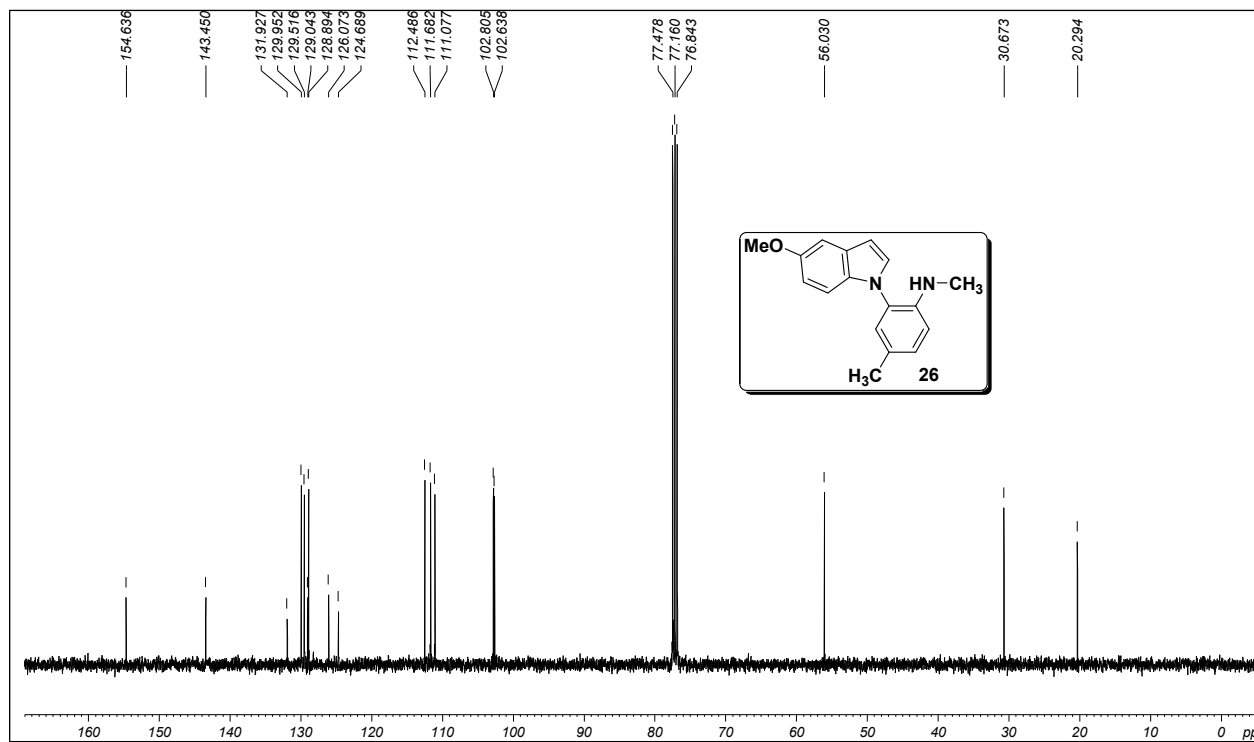

Figure S118. 100 MHz  $^{13}\text{C}$  NMR spectrum of **26** in  $\text{CDCl}_3$

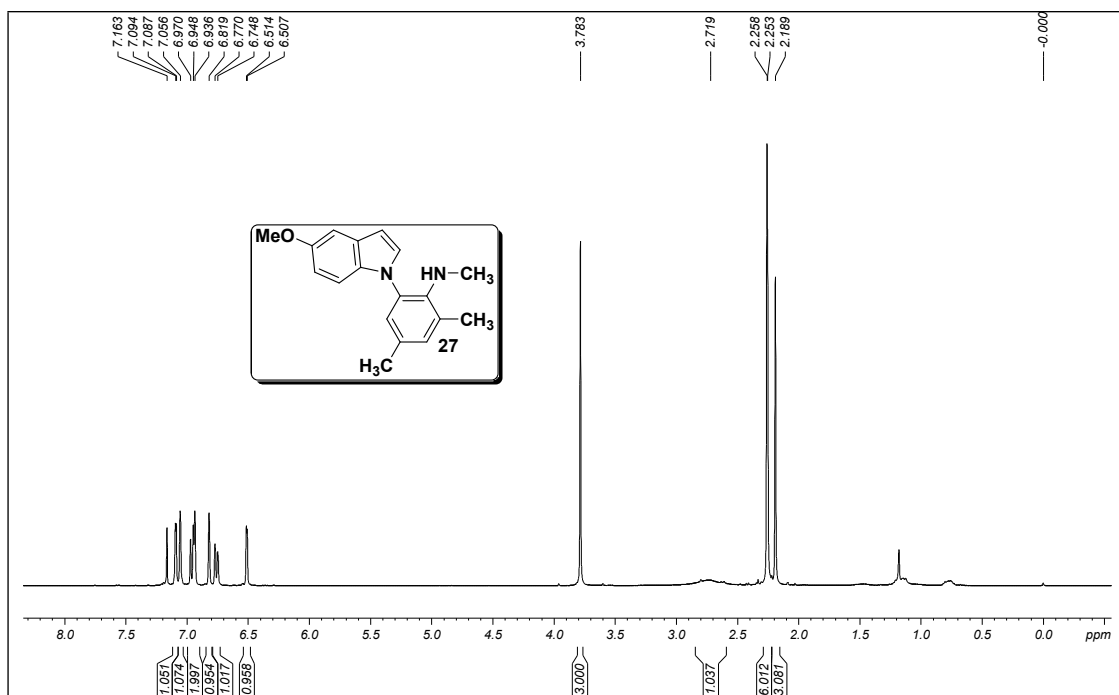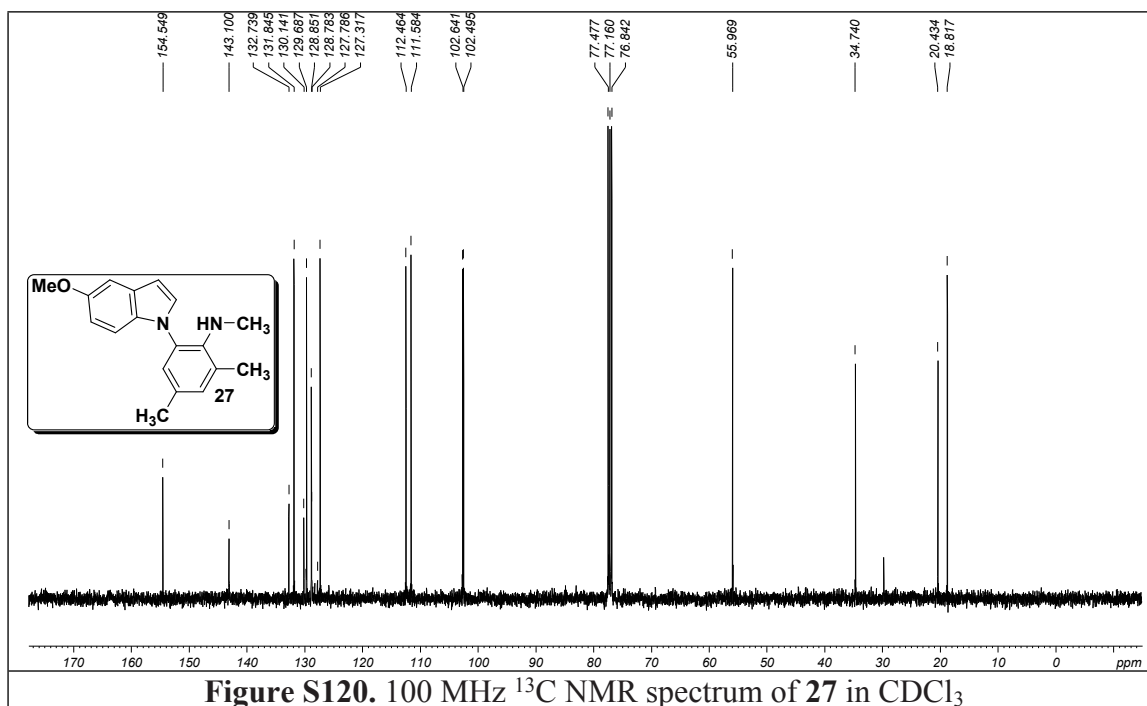



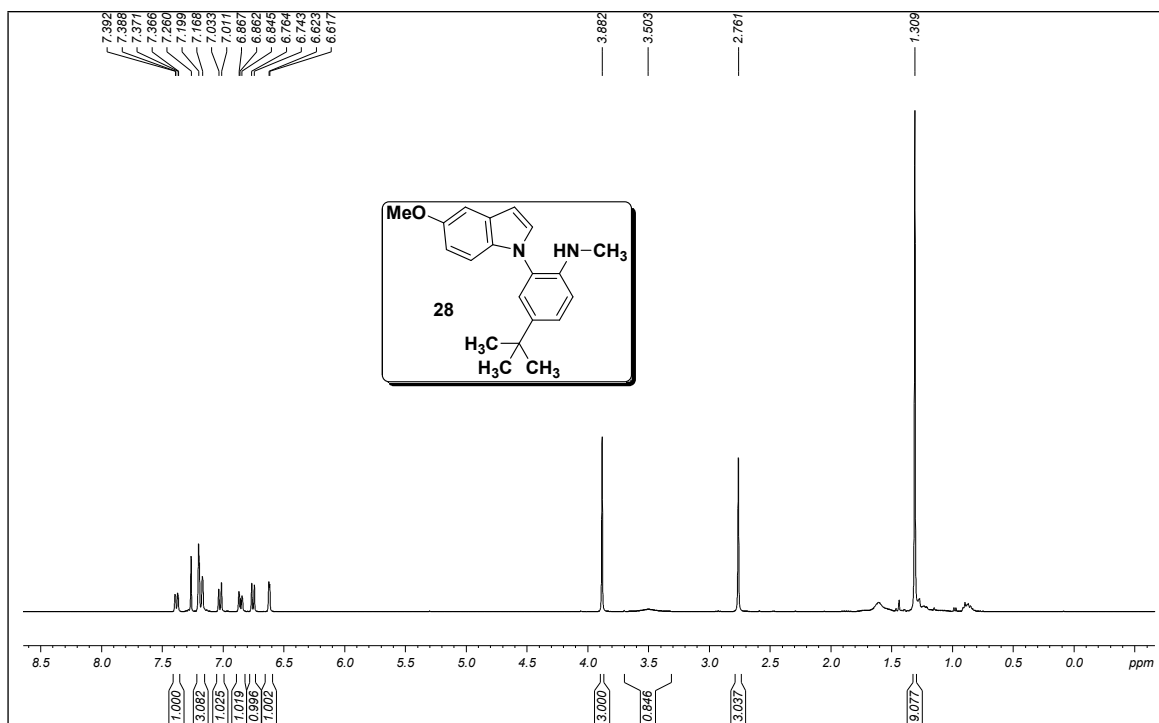

Figure S121. 400 MHz <sup>1</sup>H NMR spectrum of **28** in CDCl<sub>3</sub>

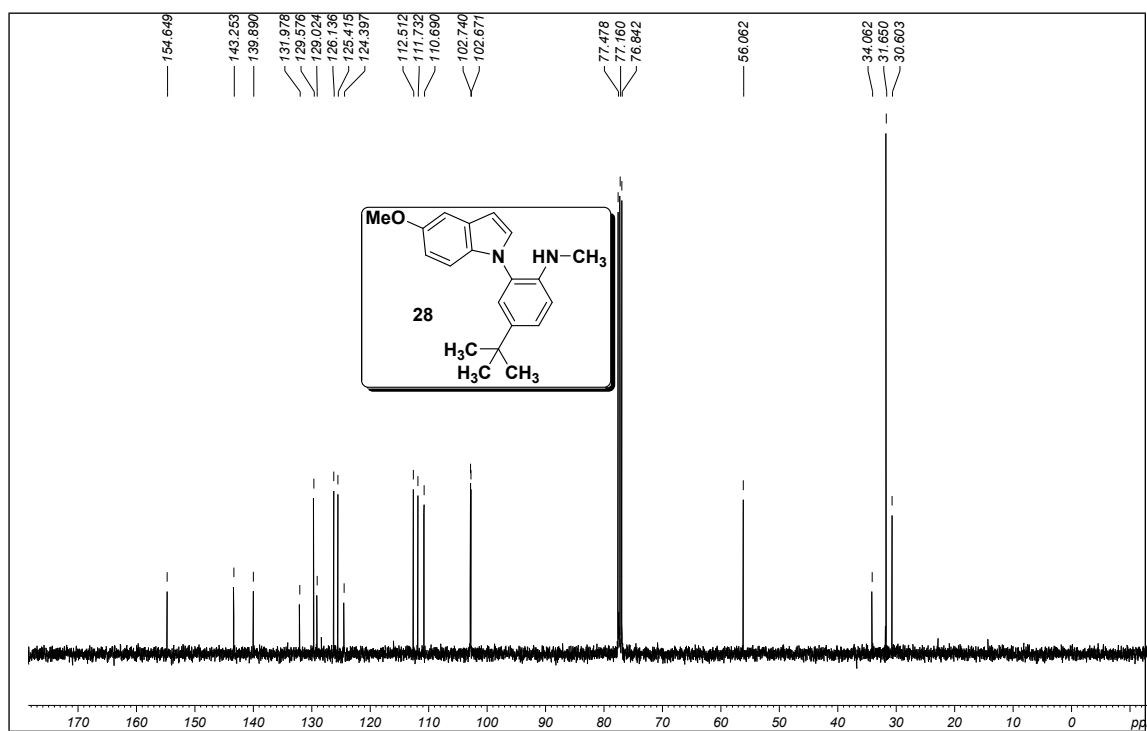

Figure S122. 100 MHz <sup>13</sup>C NMR spectrum of **28** in CDCl<sub>3</sub>

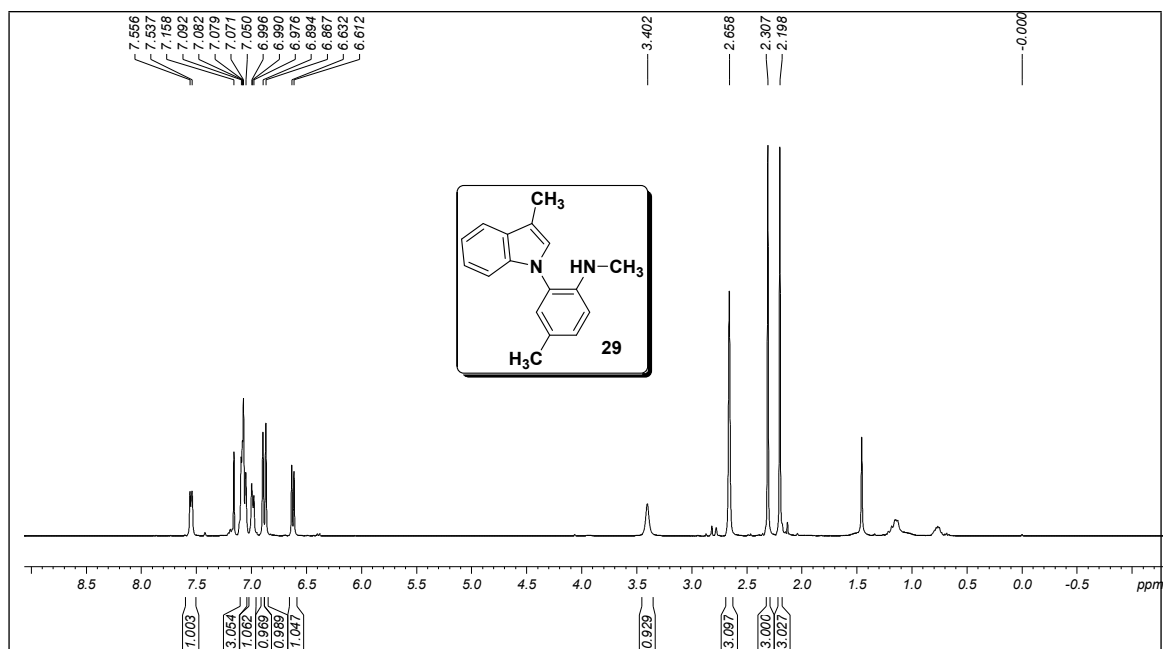

Figure S123. 400 MHz  $^1\text{H}$  NMR spectrum of **29** in  $\text{CDCl}_3$

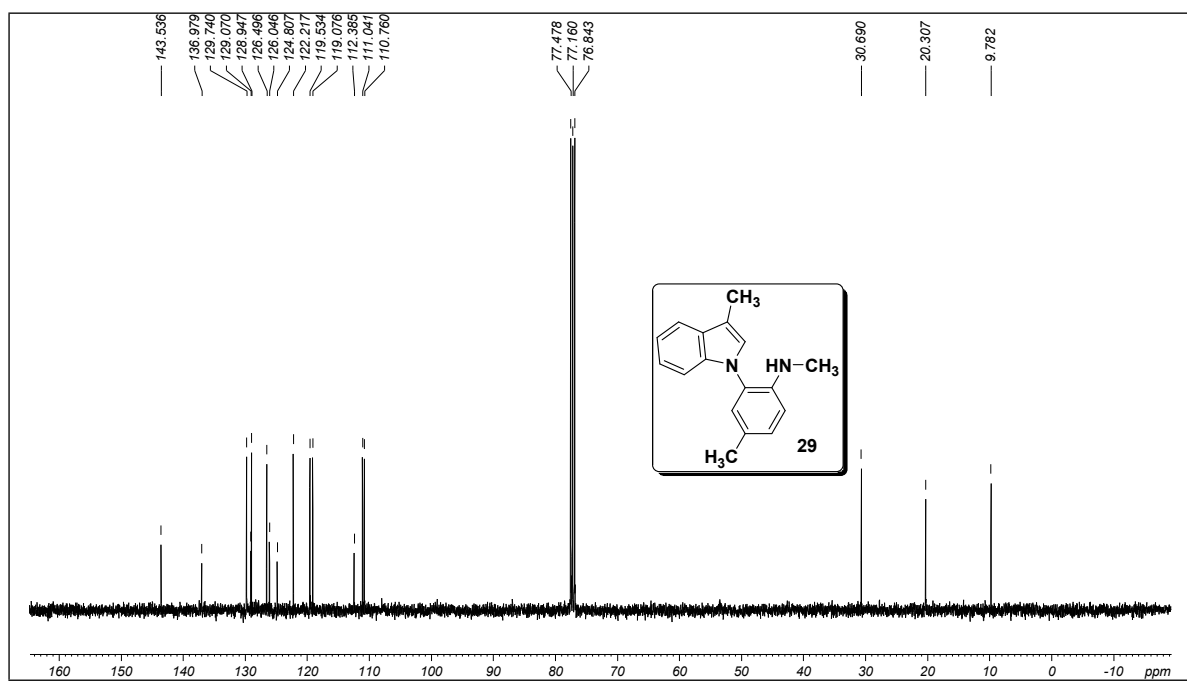

Figure S124. 100 MHz  $^{13}\text{C}$  NMR spectrum of **29** in  $\text{CDCl}_3$

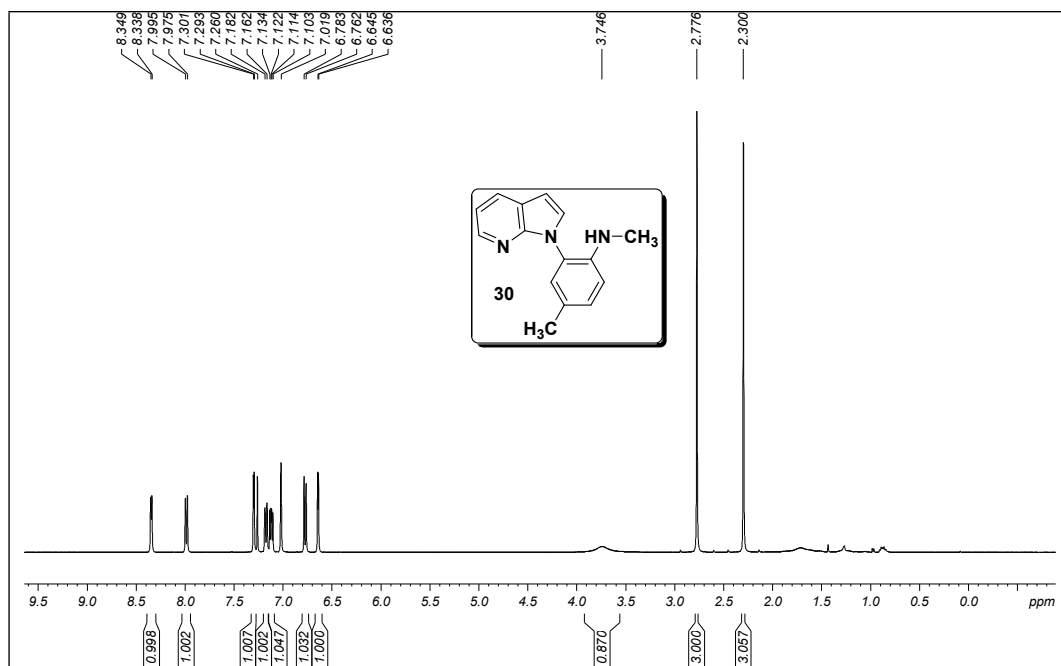

Figure S125. 400 MHz  $^1\text{H}$  NMR spectrum of **30** in  $\text{CDCl}_3$

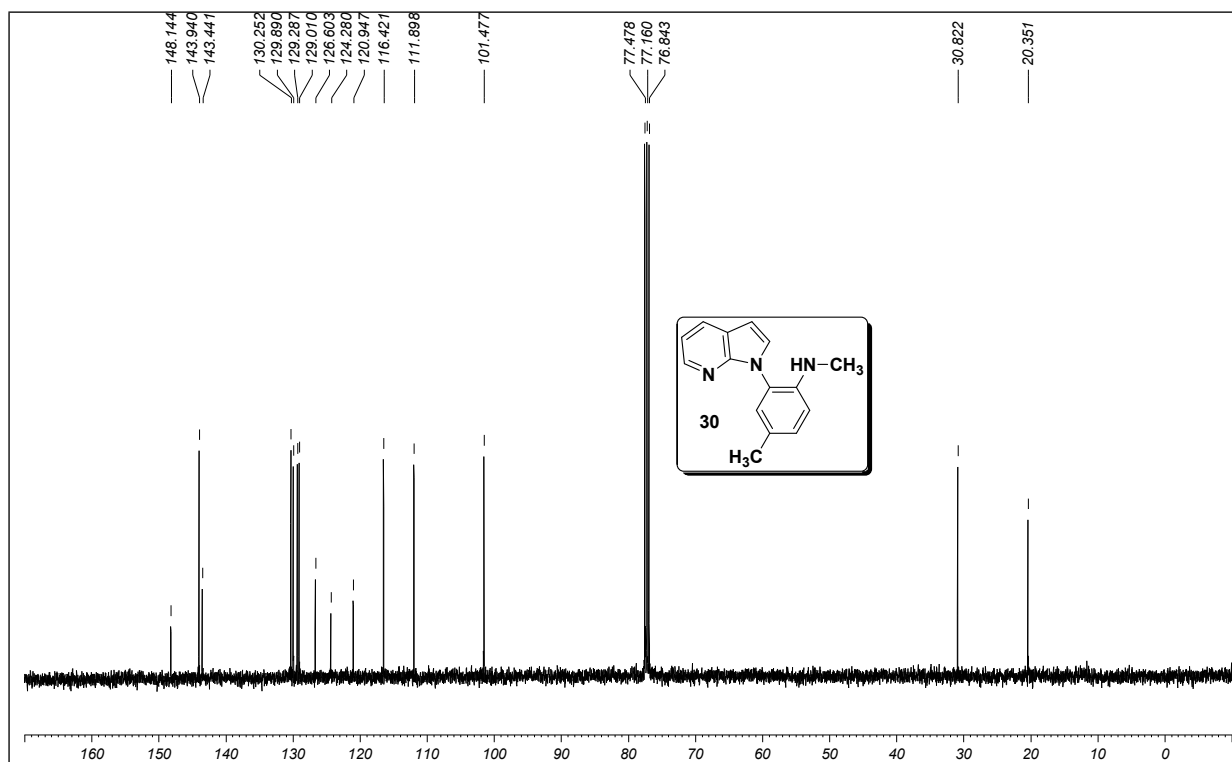

Figure S126. 100 MHz  $^{13}\text{C}$  NMR spectrum of **30** in  $\text{CDCl}_3$

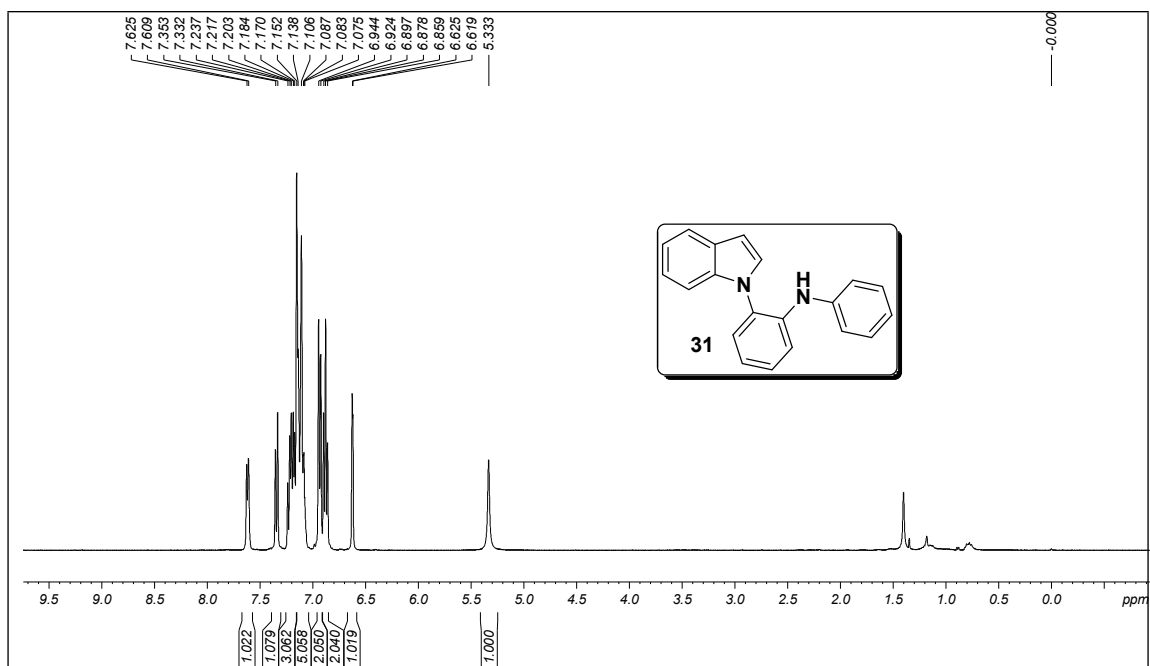

Figure S127. 400 MHz  $^1\text{H}$  NMR spectrum of **31** in  $\text{CDCl}_3$

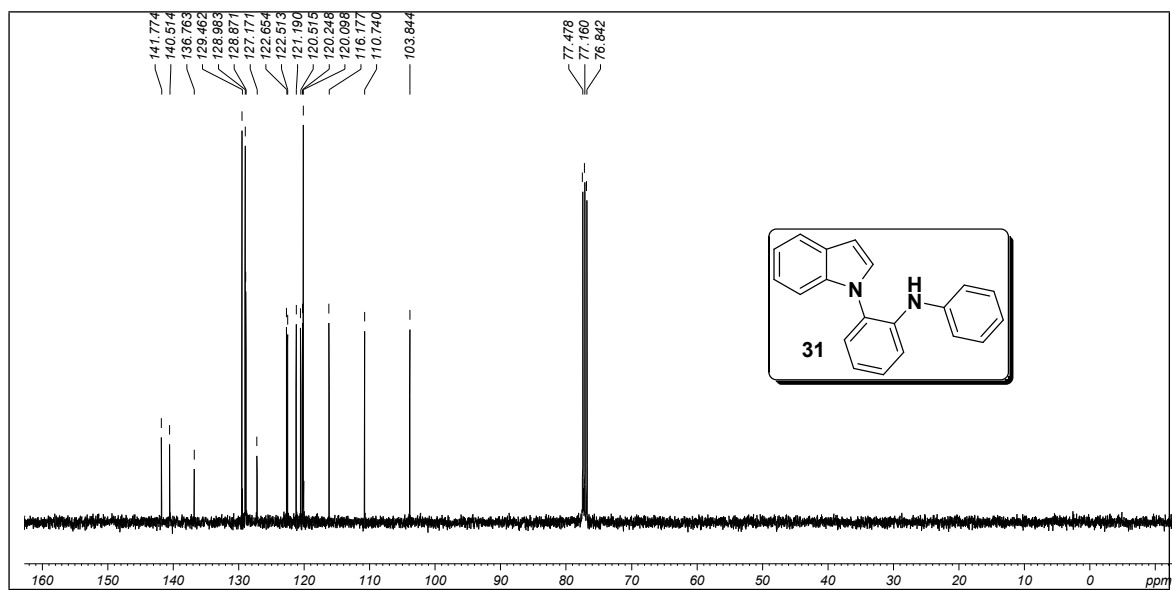

Figure S128. 100 MHz  $^{13}\text{C}$  NMR spectrum of **31** in  $\text{CDCl}_3$

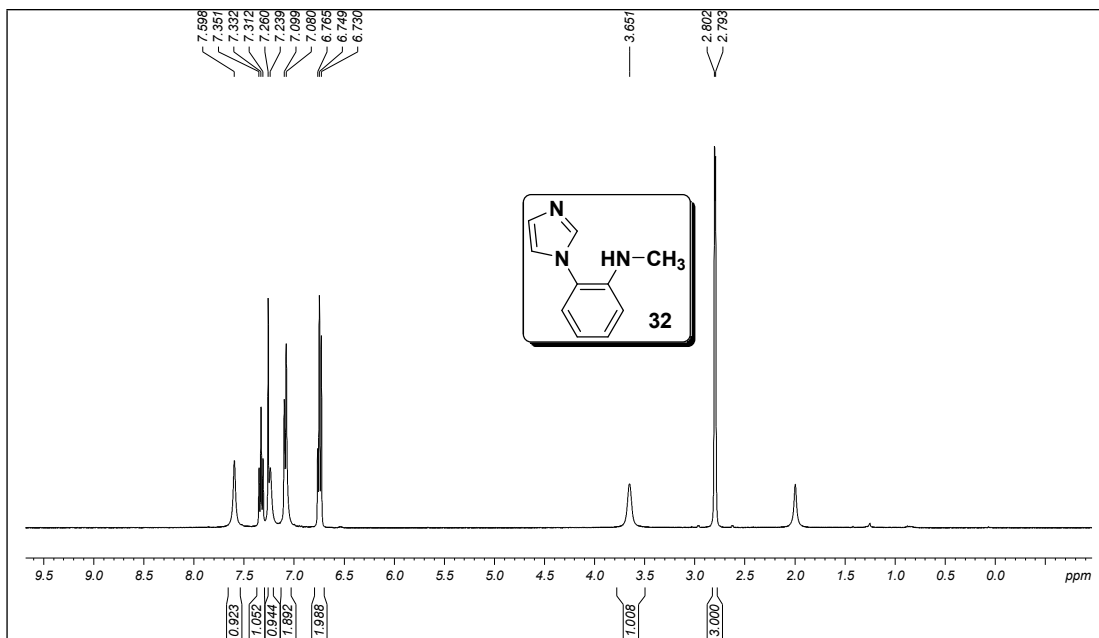

Figure S129. 400 MHz  $^1\text{H}$  NMR spectrum of **32** in  $\text{CDCl}_3$

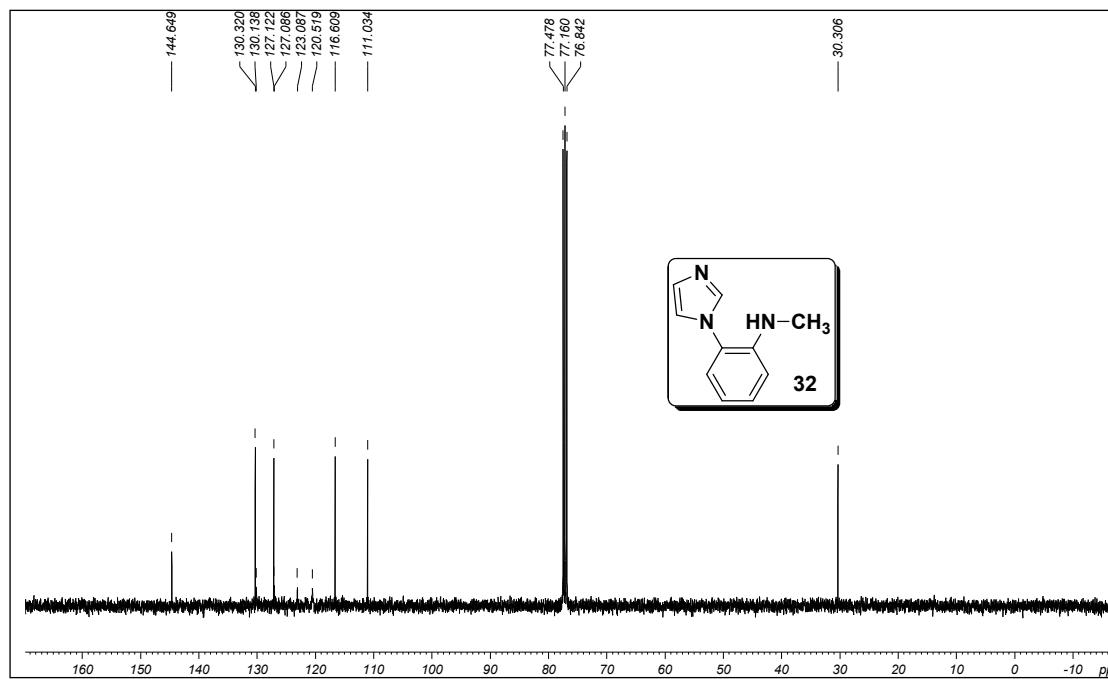

Figure S130. 100 MHz  $^{13}\text{C}$  NMR spectrum of **32** in  $\text{CDCl}_3$

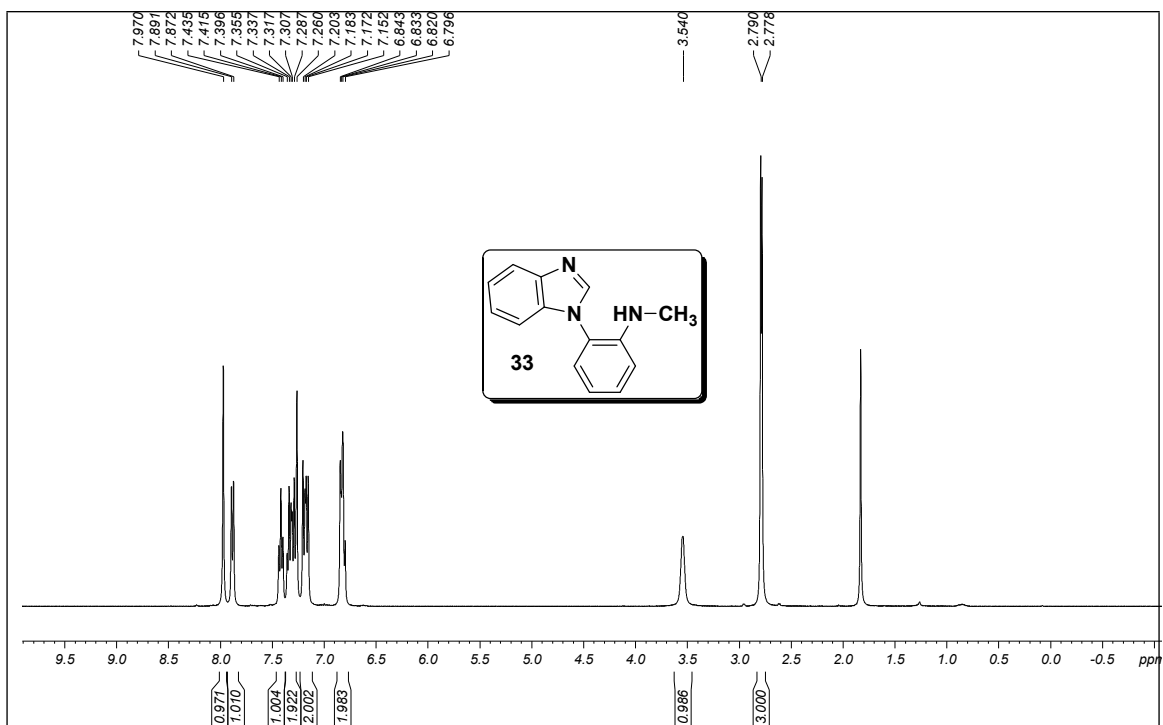

Figure S131. 400 MHz <sup>1</sup>H NMR spectrum of **33** in CDCl<sub>3</sub>

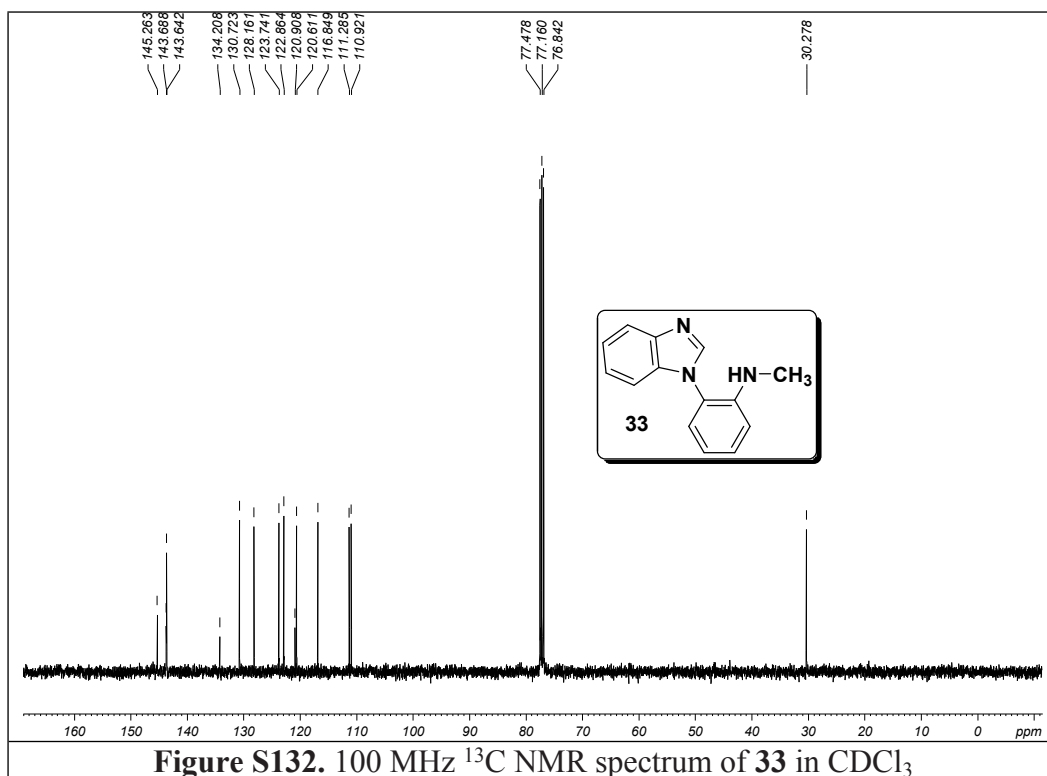

Figure S132. 100 MHz <sup>13</sup>C NMR spectrum of **33** in CDCl<sub>3</sub>

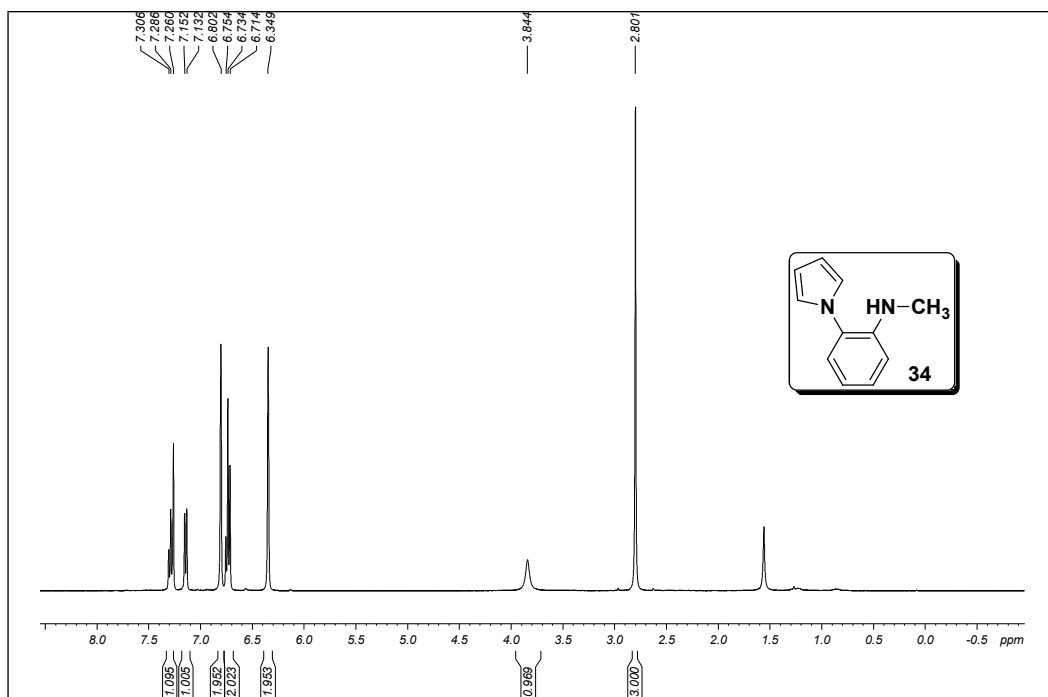

Figure S133. 400 MHz  $^1\text{H}$  NMR spectrum of **34** in  $\text{CDCl}_3$

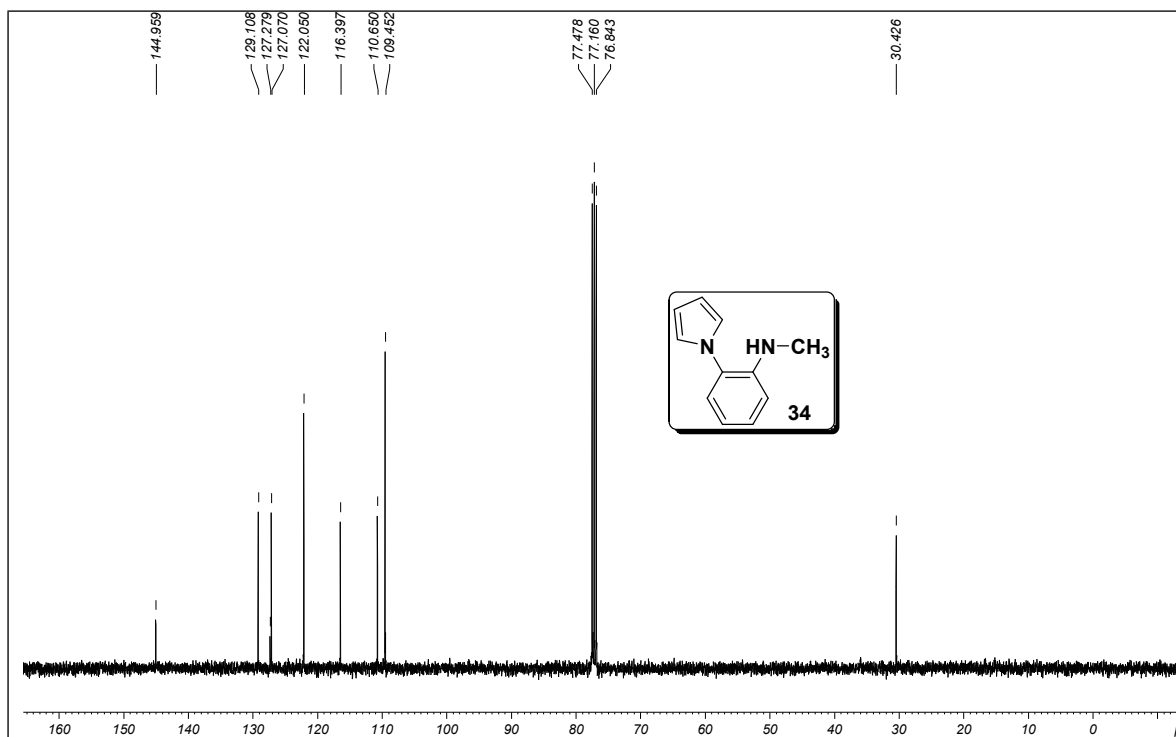

Figure S134. 100 MHz  $^{13}\text{C}$  NMR spectrum of **34** in  $\text{CDCl}_3$

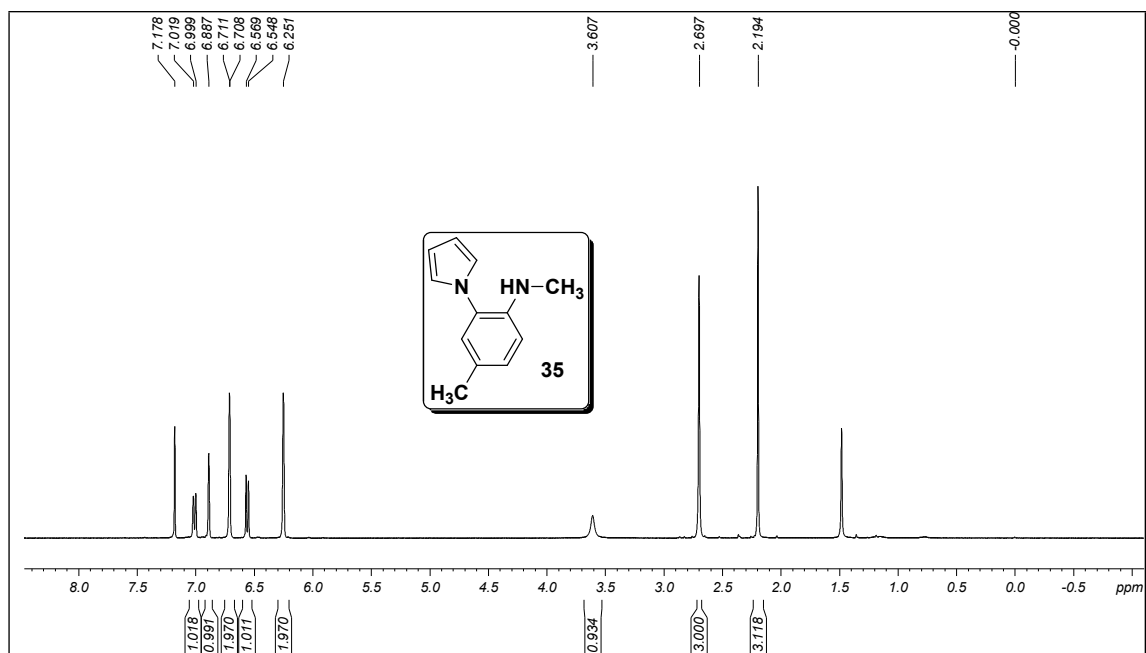

Figure S135. 400 MHz  $^1\text{H}$  NMR spectrum of **35** in  $\text{CDCl}_3$

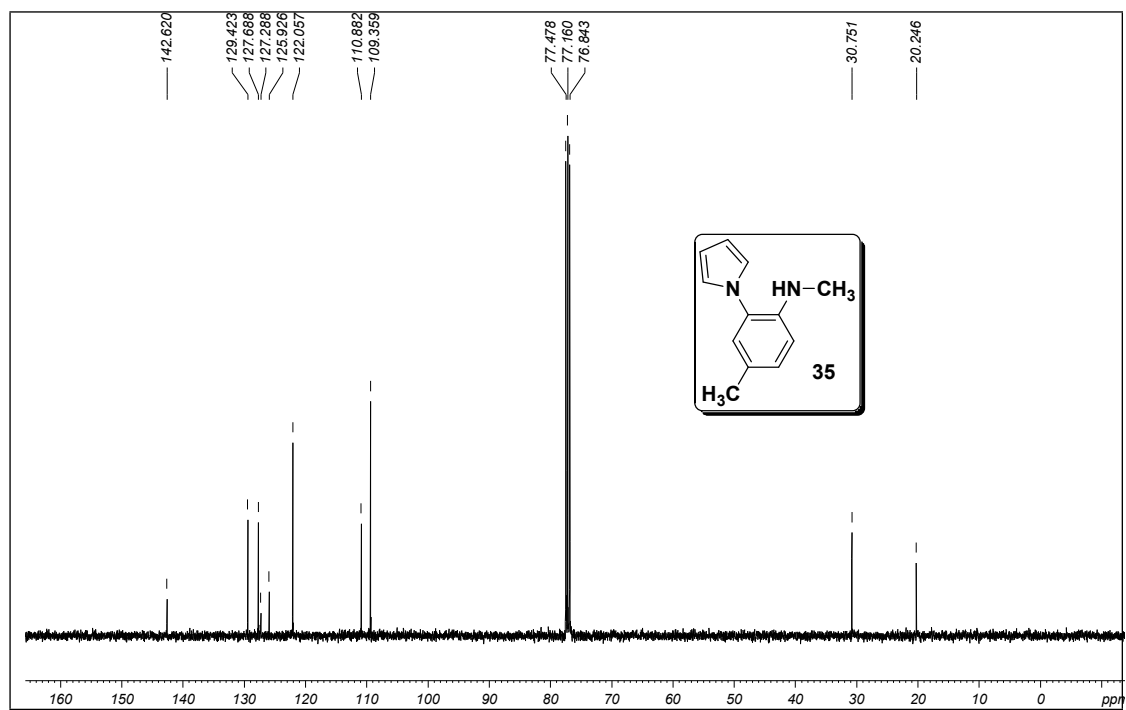

Figure S136. 100 MHz  $^{13}\text{C}$  NMR spectrum of **35** in  $\text{CDCl}_3$



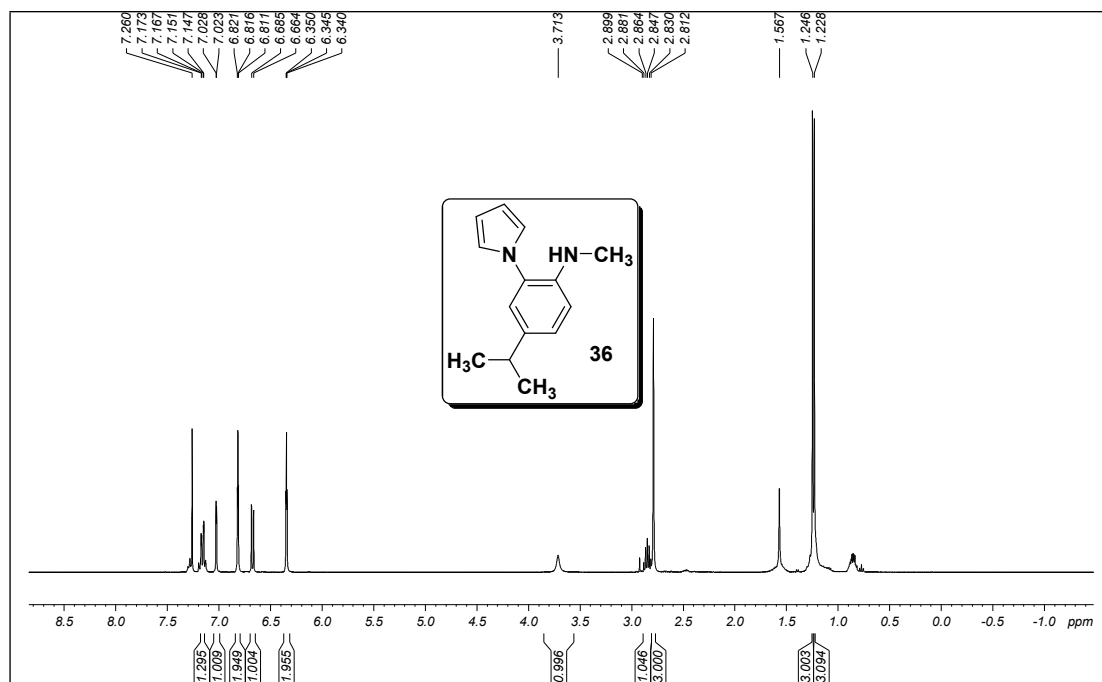

Figure S137. 400 MHz <sup>1</sup>H NMR spectrum of **36** in CDCl<sub>3</sub>

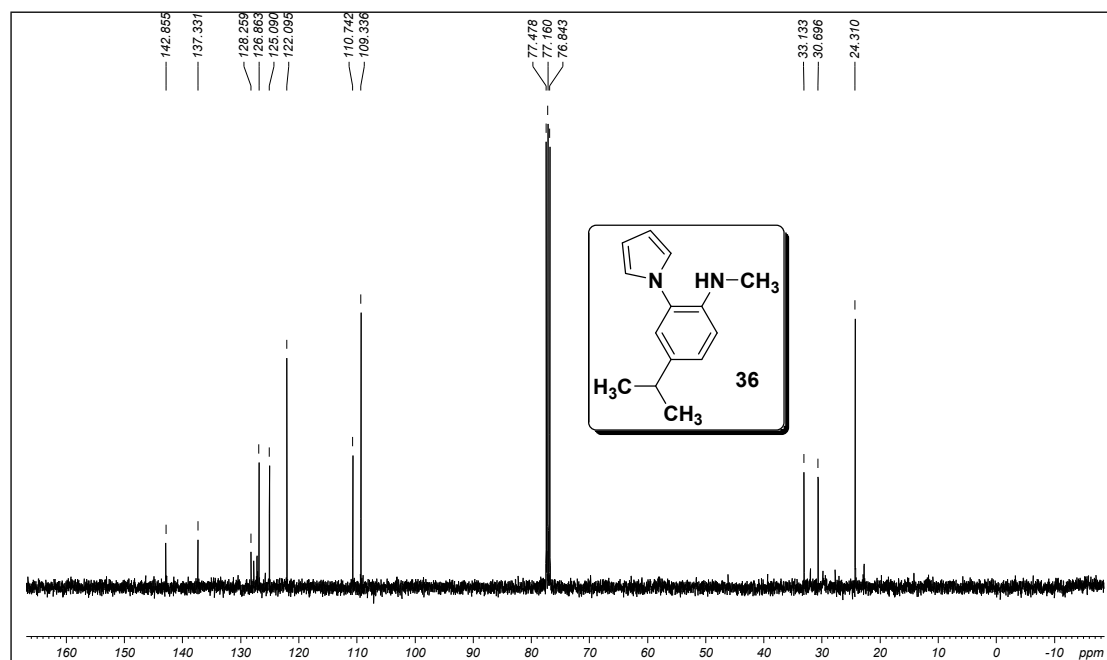

Figure S138. 100 MHz <sup>13</sup>C NMR spectrum of **36** in CDCl<sub>3</sub>

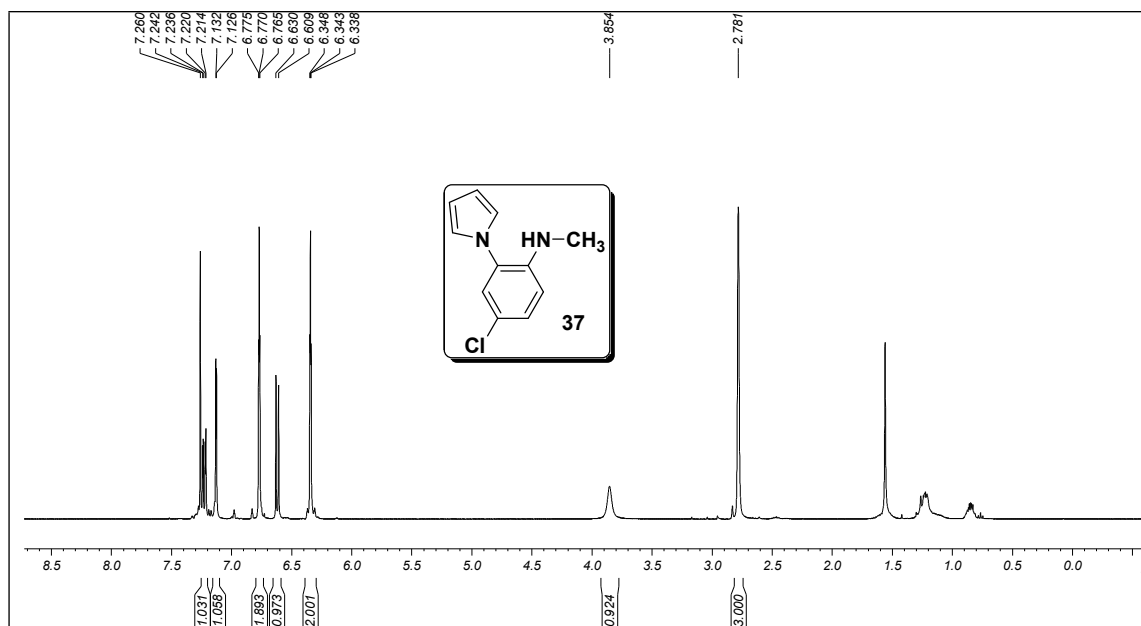

Figure S139. 400 MHz  $^1\text{H}$  NMR spectrum of **37** in  $\text{CDCl}_3$

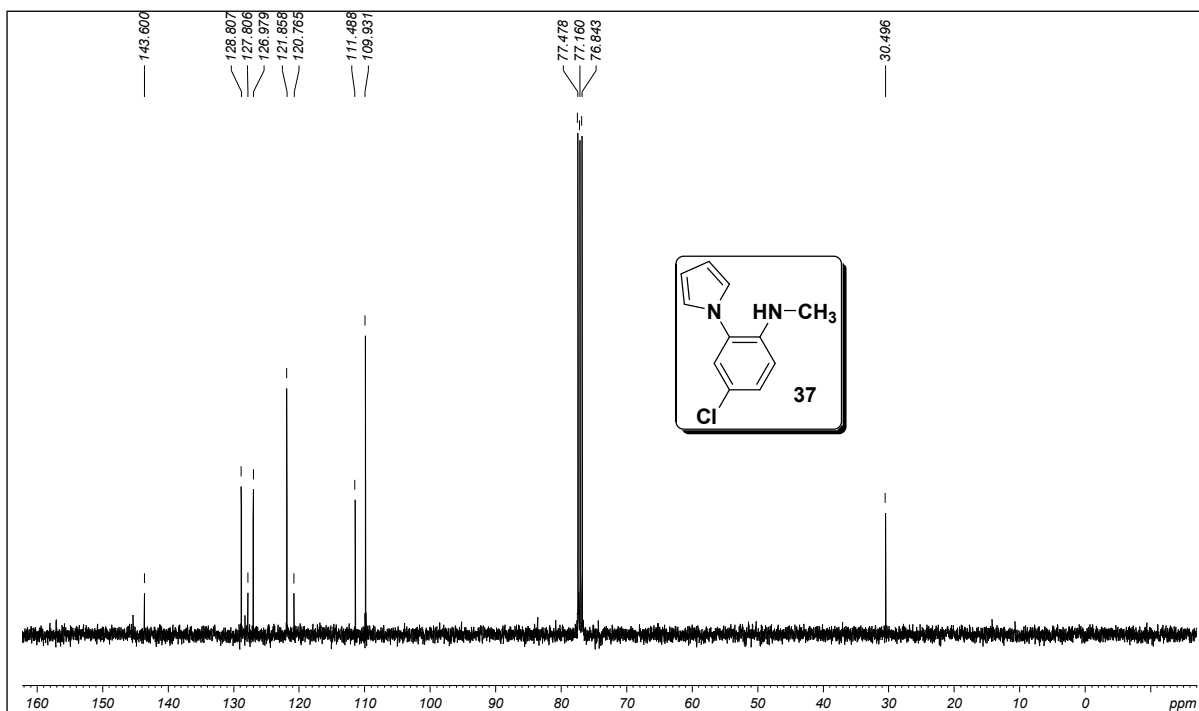

Figure S140. 100 MHz  $^{13}\text{C}$  NMR spectrum of **37** in  $\text{CDCl}_3$

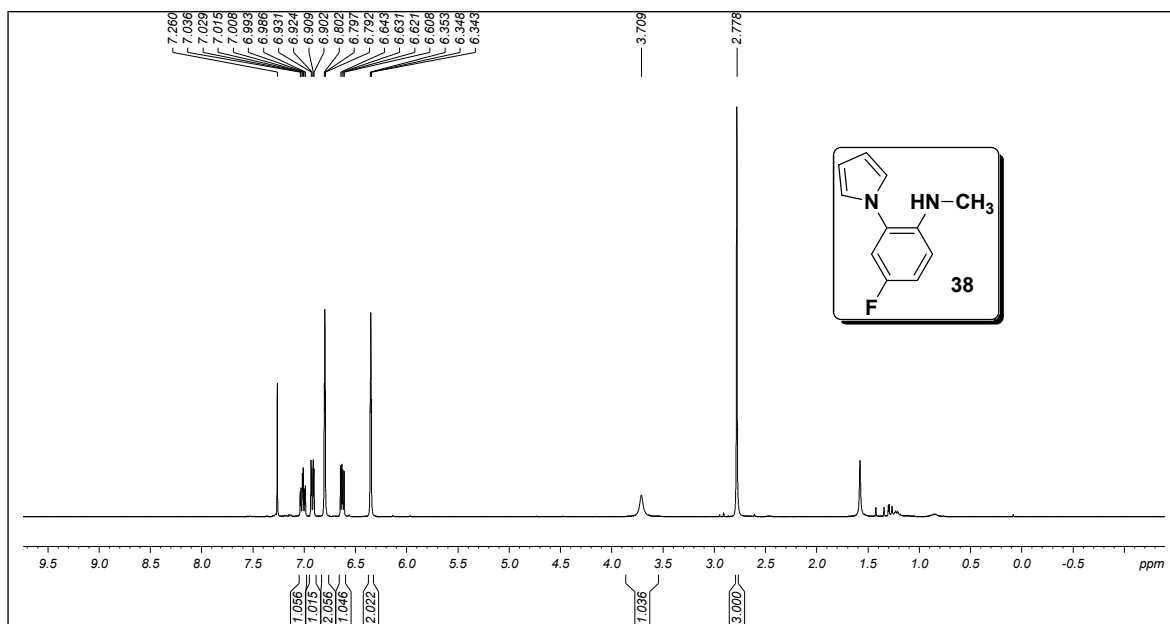

Figure S141. 400 MHz <sup>1</sup>H NMR spectrum of **38** in CDCl<sub>3</sub>

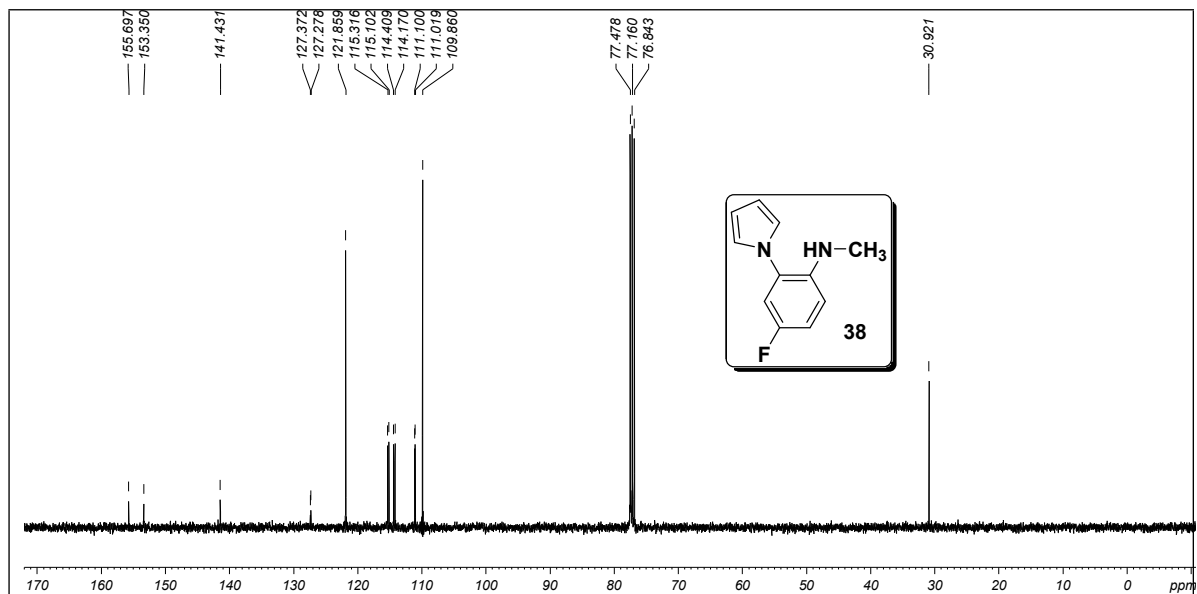

Figure S142. 100 MHz <sup>13</sup>C NMR spectrum of **38** in CDCl<sub>3</sub>

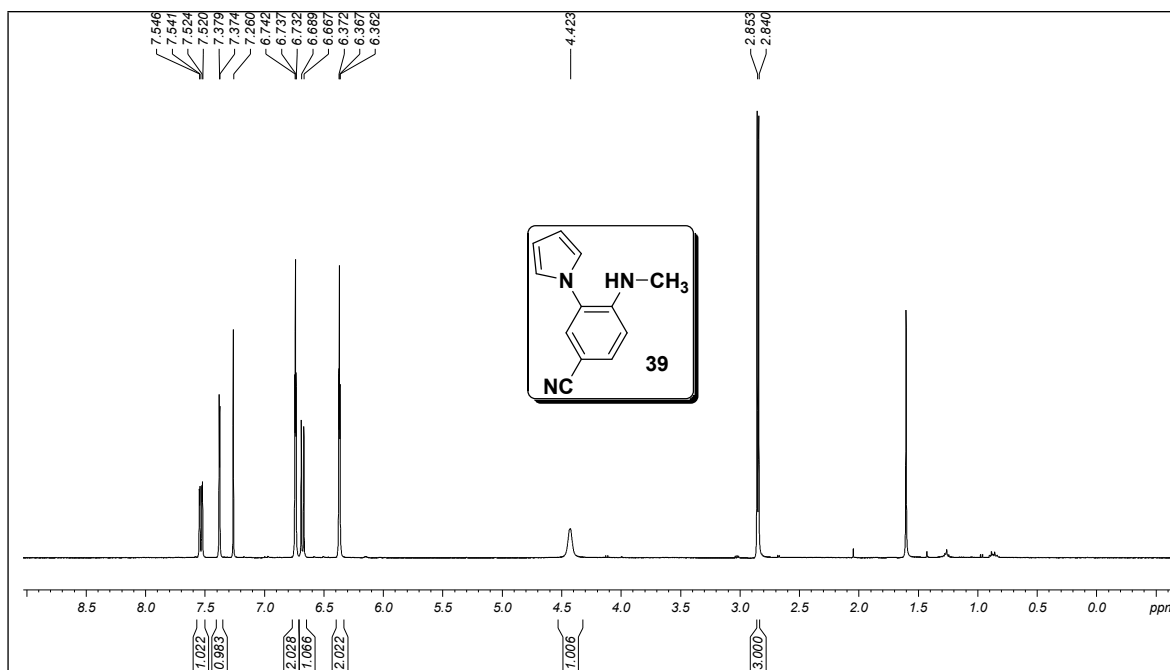

Figure S143. 400 MHz  $^1\text{H}$  NMR spectrum of **39** in  $\text{CDCl}_3$

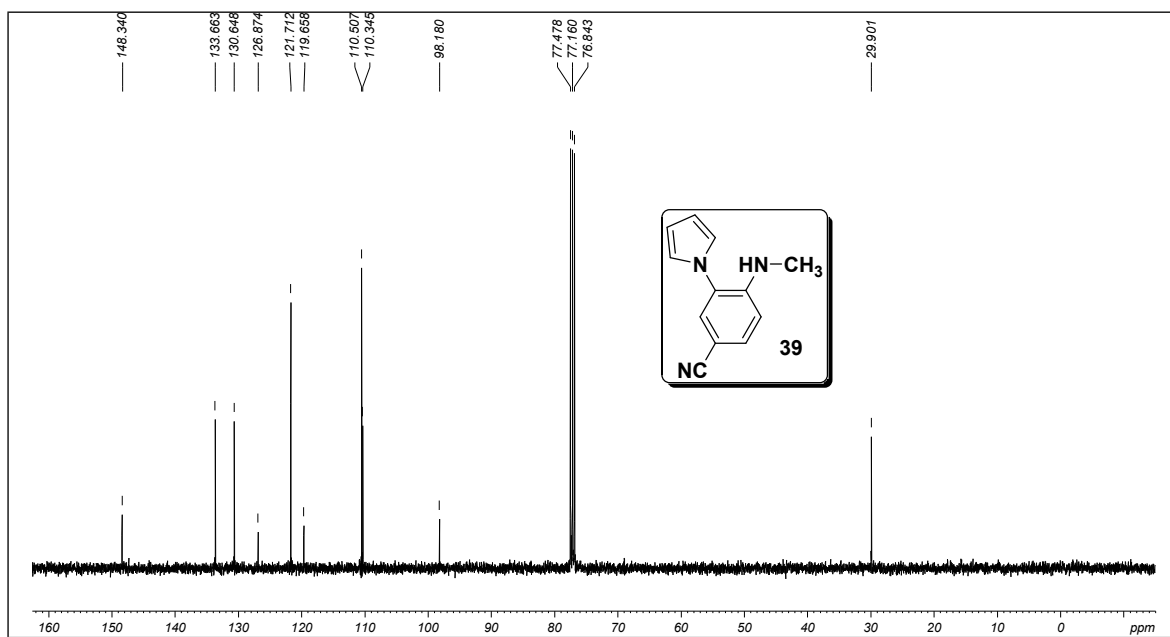

Figure S144. 100 MHz  $^{13}\text{C}$  NMR spectrum of **39** in  $\text{CDCl}_3$

**XII. Table 1.** Crystal data and structure refinement for '3a'

|                                   |                                                                                                                                                                             |
|-----------------------------------|-----------------------------------------------------------------------------------------------------------------------------------------------------------------------------|
| Identification code               | ACS1313                                                                                                                                                                     |
| Empirical formula                 | C <sub>19</sub> H <sub>18</sub> N <sub>2</sub> O                                                                                                                            |
| Formula weight                    | 290.35                                                                                                                                                                      |
| Temperature                       | 296(2) K                                                                                                                                                                    |
| Wavelength                        | 0.71073 Å                                                                                                                                                                   |
| Crystal system                    | Triclinic                                                                                                                                                                   |
| Space group                       | P-1                                                                                                                                                                         |
| Unit cell dimensions              | a = 10.6986(5) Å                      α = 81.323(3)°.<br>b = 11.3012(5) Å                        β = 89.730(3)°.<br>c = 14.4283(6) Å                        γ = 61.927(2)°. |
| Volume                            | 1517.23(12) Å <sup>3</sup>                                                                                                                                                  |
| Z                                 | 4                                                                                                                                                                           |
| Density (calculated)              | 1.271 Mg/m <sup>3</sup>                                                                                                                                                     |
| Absorption coefficient            | 0.079 mm <sup>-1</sup>                                                                                                                                                      |
| F(000)                            | 616                                                                                                                                                                         |
| Crystal size                      | 0.300 x 0.250 x 0.200 mm <sup>3</sup>                                                                                                                                       |
| Theta range for data collection   | 2.072 to 25.000°                                                                                                                                                            |
| Index ranges                      | -12 ≤ h ≤ 12, -13 ≤ k ≤ 13, -17 ≤ l ≤ 17                                                                                                                                    |
| Reflections collected             | 35239                                                                                                                                                                       |
| Independent reflections           | 5347 [R(int) = 0.0414]                                                                                                                                                      |
| Completeness to theta = 25.000°   | 100.0 %                                                                                                                                                                     |
| Absorption correction             | Semi-empirical from equivalents                                                                                                                                             |
| Max. and min. transmission        | 0.7457 and 0.7027                                                                                                                                                           |
| Refinement method                 | Full-matrix least-squares on F <sup>2</sup>                                                                                                                                 |
| Data / restraints / parameters    | 5347 / 0 / 407                                                                                                                                                              |
| Goodness-of-fit on F <sup>2</sup> | 1.027                                                                                                                                                                       |
| Final R indices [I > 2σ(I)]       | R1 = 0.0446, wR2 = 0.1081                                                                                                                                                   |
| R indices (all data)              | R1 = 0.0708, wR2 = 0.1287                                                                                                                                                   |
| Extinction coefficient            | 0.0068(11)                                                                                                                                                                  |
| Largest diff. peak and hole       | 0.181 and -0.170 e.Å <sup>-3</sup>                                                                                                                                          |

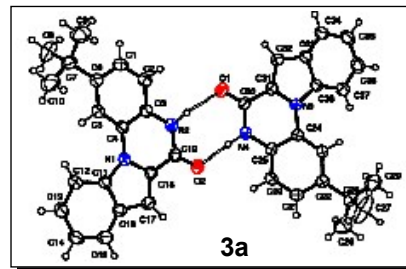

**XIII. Table 2.** Crystal data and structure refinement for '8a'

|                                   |                                                  |                |
|-----------------------------------|--------------------------------------------------|----------------|
| Identification code               | 1328B                                            |                |
| Empirical formula                 | C <sub>16</sub> H <sub>12</sub> N <sub>2</sub> O |                |
| Formula weight                    | 248.28                                           |                |
| Temperature                       | 293(2) K                                         |                |
| Wavelength                        | 0.71073 Å                                        |                |
| Crystal system                    | Monoclinic                                       |                |
| Space group                       | P2 <sub>1</sub> /n                               |                |
| Unit cell dimensions              | a = 7.480(6) Å                                   | α = 90°.       |
|                                   | b = 10.122(7) Å                                  | β = 96.16(3)°. |
|                                   | c = 15.888(11) Å                                 | γ = 90°.       |
| Volume                            | 1196.0(15) Å <sup>3</sup>                        |                |
| Z                                 | 4                                                |                |
| Density (calculated)              | 1.379 Mg/m <sup>3</sup>                          |                |
| Absorption coefficient            | 0.088 mm <sup>-1</sup>                           |                |
| F(000)                            | 520                                              |                |
| Crystal size                      | 0.150 x 0.150 x 0.100 mm <sup>3</sup>            |                |
| Theta range for data collection   | 3.150 to 24.999°                                 |                |
| Index ranges                      | -8 ≤ h ≤ 8, -12 ≤ k ≤ 12, -18 ≤ l ≤ 18           |                |
| Reflections collected             | 18307                                            |                |
| Independent reflections           | 2094 [R(int) = 0.0334]                           |                |
| Completeness to theta = 24.999°   | 99.5 %                                           |                |
| Absorption correction             | Semi-empirical from equivalents                  |                |
| Max. and min. transmission        | 0.7462 and 0.6786                                |                |
| Refinement method                 | Full-matrix least-squares on F <sup>2</sup>      |                |
| Data / restraints / parameters    | 2094 / 0 / 173                                   |                |
| Goodness-of-fit on F <sup>2</sup> | 1.068                                            |                |
| Final R indices [I > 2σ(I)]       | R1 = 0.0422, wR2 = 0.1050                        |                |
| R indices (all data)              | R1 = 0.0555, wR2 = 0.1197                        |                |
| Extinction coefficient            | n/a                                              |                |
| Largest diff. peak and hole       | 0.159 and -0.145 e.Å <sup>-3</sup>               |                |

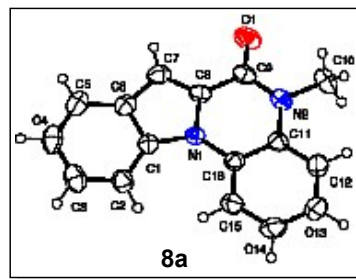

**XIV. Table 3.** Crystal data and structure refinement for '35a'

|                                   |                                                  |                    |
|-----------------------------------|--------------------------------------------------|--------------------|
| Identification code               | ACS1461                                          |                    |
| Empirical formula                 | C <sub>13</sub> H <sub>12</sub> N <sub>2</sub> O |                    |
| Formula weight                    | 212.25                                           |                    |
| Temperature                       | 296(2) K                                         |                    |
| Wavelength                        | 0.71073 Å                                        |                    |
| Crystal system                    | Monoclinic                                       |                    |
| Space group                       | P2 <sub>1</sub> /c                               |                    |
| Unit cell dimensions              | a = 6.9280(2) Å                                  | α = 90°.           |
|                                   | b = 10.4940(3) Å                                 | β = 102.9760(10)°. |
|                                   | c = 15.3990(4) Å                                 | γ = 90°.           |
| Volume                            | 1090.96(5) Å <sup>3</sup>                        |                    |
| Z                                 | 4                                                |                    |
| Density (calculated)              | 1.292 Mg/m <sup>3</sup>                          |                    |
| Absorption coefficient            | 0.084 mm <sup>-1</sup>                           |                    |
| F(000)                            | 448                                              |                    |
| Crystal size                      | 0.200 x 0.150 x 0.100 mm <sup>3</sup>            |                    |
| Theta range for data collection   | 3.017 to 24.995°                                 |                    |
| Index ranges                      | -8 ≤ h ≤ 8, -12 ≤ k ≤ 12, -18 ≤ l ≤ 18           |                    |
| Reflections collected             | 27684                                            |                    |
| Independent reflections           | 1967 [R(int) = 0.2297]                           |                    |
| Completeness to theta = 24.995°   | 99.7 %                                           |                    |
| Absorption correction             | Mmulti-scan                                      |                    |
| Max. and min. transmission        | 0.7456 and 0.5782                                |                    |
| Refinement method                 | Full-matrix least-squares on F <sup>2</sup>      |                    |
| Data / restraints / parameters    | 1967 / 1 / 149                                   |                    |
| Goodness-of-fit on F <sup>2</sup> | 1.092                                            |                    |
| Final R indices [I > 2σ(I)]       | R1 = 0.0622, wR2 = 0.1624                        |                    |
| R indices (all data)              | R1 = 0.0738, wR2 = 0.1800                        |                    |
| Extinction coefficient            | 0.27(3)                                          |                    |
| Largest diff. peak and hole       | 0.246 and -0.248 e.Å <sup>-3</sup>               |                    |

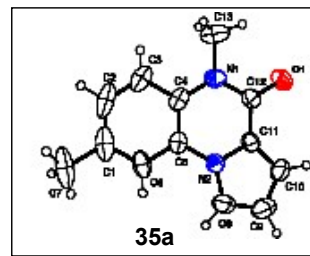

Supplement: c9ob02703c1.pdf [file c9ob02703c1.pdf]
